# Supplementary material for: Inherited Variants in Regulatory T Cell Genes and Outcome of Ovarian Cancer
Source: PLoS One. 2013 Jan 30;8(1):e53903. doi: 10.1371/journal.pone.0053903 (PMC3559692; doi:10.1371/journal.pone.0053903)
Supplement: Table S1 — Gene information. (XLS) [file pone.0053903.s001.xls]

## Sheet: Supplemental_Table_1
Table S1. Gene information
Gene Name	GeneID	RefSeq	Chr	Start (bp)	Size (kb)	Description	Reference	N TagSNPs (Attempted)	N eQTL SNPs (Attempted)
ACVR2B	93	NM_001106.3	3	38470794	38.843	activin A receptor, type IIB	[5]	19 (19)	1 (1)
AGTR1	185	NM_000685.4	3	149898348	45.132	angiotensin II receptor, type 1	[12]	35 (36)	0 (0)
CCL11	6356	NM_002986.2	17	29636800	2.512	chemokine (C-C motif) ligand 11	[32]	14 (14)	0 (0)
CCL17	6361	NM_002987.2	16	55996180	11.295	chemokine (C-C motif) ligand 17	[30]	9 (12)	2 (2)
CCL19	6363	NM_006274.2	9	34679567	1.707	chemokine (C-C motif) ligand 19	[20]	9 (9)	0 (0)
CCL2	6347	NM_002982.3	17	29606409	1.926	chemokine (C-C motif) ligand 2	[32]	12 (14)	0 (0)
CCL20	6364	NM_004591.1	2	228386814	3.68	chemokine (C-C motif) ligand 20	[7]	3 (4)	0 (0)
CCL22	6367	NM_002990.3	16	55950219	7.383	chemokine (C-C motif) ligand 22	[29]	9 (13)	1 (1)
CCL3	6348	NM_002983.2	17	31439715	1.904	chemokine (C-C motif) ligand 3	[20]	9 (12)	0 (0)
CCL4	6351	NM_002984.2	17	31455333	1.794	chemokine (C-C motif) ligand 4	[29]	8 (11)	0 (0)
CCL5	6352	NM_002985.2	17	31222608	8.882	chemokine (C-C motif) ligand 5	[9]	4 (5)	2 (2)
CCR4	1233	NM_005508.4	3	32968070	3.337	chemokine (C-C motif) receptor 4	[9]	4 (4)	0 (0)
CCR6	1235	NM_004367.5	6	167445285	27.334	chemokine (C-C motif) receptor 6	[7]	39 (39)	0 (0)
CCR7	1236	NM_001838.2	17	35963547	11.703	chemokine (C-C motif) receptor 7	[33]	8 (8)	3 (3)
CCR8	1237	NM_005201.2	3	39346219	4.858	chemokine (C-C motif) receptor 8	[10]	4 (6)	0 (0)
CD274	29126	NM_014143.2	9	5440559	17.918	CD274 molecule	[8]	29 (30)	0 (0)
CD46	4179	NM_002389.3	1	205992025	43.456	CD46 molecule, complement regulatory protein	[4]	17 (23)	0 (0)
CD80	941	NM_005191.3	3	120725830	35.341	CD80 molecule	[11]	50 (57)	6# (6#)
CD86	942	NM_175862.3	3	123256911	65.762	CD86 molecule	[11]	42 (44)	1 (2)
CXCL10	3627	NM_001565.2	4	77161295	2.379	chemokine (C-X-C motif) ligand 10	[13]	8 (9)	28# (28#)
CXCL13	10563	NM_006419.1	4	78651931	100.079	chemokine (C-X-C motif) ligand 13 (B-cell chemoattractant)	[14]	23 (28)	0 (0)
CXCR5	643	NM_001716.2	11	118259777	12.404	chemokine (C-X-C motif) receptor 5	[14]	16 (20)	0 (0)
DUSP4	1846	NM_001394.5	8	29249530	14.574	dual specificity phosphatase 4	[6]	14 (17)	0 (0)
EGR2	1959	NM_000399.2	10	64241763	4.37	early growth response 2 (Krox-20 homolog, Drosophila)	[23]	8 (9)	0 (0)
GPR83	10888	NM_016540.2	11	93750131	23.935	G protein-coupled receptor 83	[25]	21 (24)	0 (0)
IDO1	3620	NM_002164.4	8	39890485	14.622	indoleamine-pyrrole 2,3 dioxygenase	[18]	14 (54)	0 (0)
IKZF2	22807	NM_001079526.1	2	213572653	151.925	IKAROS family zinc finger 2 (Helios)	[6]	5 (63)	0 (0)
IKZF4	64375	NM_022465.3	12	54700956	17.53	IKAROS family zinc finger 4 (Eos)	[27]	26 (7)	1 (1)
IL10RB	3588	NM_000628.3	21	33560542	30.848	interleukin 10 receptor, beta	[34]	32 (33)	1 (1)
IL15RA	3601	NM_172200.1	10	6034340	25.808	interleukin 15 receptor, alpha	[21]	33 (37)	1 (1)
IL2RB	3560	NM_000878.2	22	35851824	24.084	interleukin 2 receptor, beta	[35]	8 (37)	0 (0)
IL6ST	3572	NM_002184.2	5	55272451	54.069	interleukin 6 signal transducer (gp130, oncostatin M receptor)	[15]	11 (15)	0 (0)
IL9	3578	NM_000590.1	5	135255834	3.581	interleukin 9	[16]	12 (12)	0 (0)
INHBA	3624	NM_002192.2	7	41695126	14.105	inhibin, beta A	[5]	9 (9)	0 (0)
INHBB	3625	NM_002193.2	2	120820189	5.664	inhibin, beta B	[5]	12 (15)	4 (5)
IRF4	3662	NM_002460.1	6	336760	19.433	interferon regulatory factor 4	[6]	23 (26)	1 (1)
ITGAE	3682	NM_002208.4	17	3564668	86.618	integrin, alpha E (antigen CD103)	[31]	60 (76)	0 (0)
KLF10	7071	NM_005655.1	8	103730188	6.94	Kruppel-like factor 10	[19]	13 (15)	0 (0)
LAG3	3902	NM_002286.4	12	6751931	5.949	lymphocyte-activation gene 3	[26]	10 (11)	1 (1)
LRRC32	2615	NM_005512.1	11	76046222	12.321	leucine rich repeat containing 32	[24]	32 (33)	6 (6)
MDFIC	29969	NM_199072.3	7	114349445	97.056	MyoD family inhibitor domain containing	[6]	45 (50)	3 (3)
NRP1	8829	NM_003873.4	10	33506432	157.407	neuropilin 1	[22]	141 (160)	0 (0)
PDCD1	5133	NM_005018.1	2	242440711	9.02	programmed cell death 1	[8]	9 (14)	0 (0)
PLAG1	5325	NM_001080951.1	6	144303130	124.298	pleiomorphic adenoma gene-like 1	none	79 (95)	2 (2)
PRNP	5621	NM_000311.3	20	4614797	15.437	prion protein (p27-30)	[17]	19 (21)	2 (2)
RGS1	5996	NM_002922.3	1	190811480	4.302	regulator of G-protein signaling 1	[3]	13 (14)	0 (0)
RGS16	6004	NM_002928.3	1	180834381	5.79	regulator of G-protein signaling 16	[3]	8 (9)	3 (3)
SH3BGRL2	83699	NM_031469.2	6	80397719	72.369	SH3 domain binding glutamic acid-rich protein like 2	[17]	42 (46)	0 (0)
SLC22A2	6582	NM_003058.2	6	160557780	42.169	solute carrier family 22 (organic cation transporter), member 2	[17]	27 (37)	0 (0)
SMAD3	4088	NM_005902.3	15	65145249	129.338	SMAD family member 3	[28]	95 (109)	8 (8)
SOCS2	8835	NM_003877.3	12	92487729	6.38	suppressor of cytokine signaling 2	[17]	8 (8)	0 (0)
TNFRSF18	8784	NM_004195.2	1	1128751	3.201	tumor necrosis factor receptor superfamily, member 18	[1]	9* (10*)	4 (4)
TNFRSF4	7293	NM_003327.2	1	1136569	2.806	tumor necrosis factor receptor superfamily, member 4	[2]	9* (10*)	3 (3)
TNFRSF9	3604	NM_001561.4	1	7902494	20.98	tumor necrosis factor receptor superfamily, member 9	[2]	8 (8)	0 (0)
							Total	1,257 (1,451)	83 (85)
Genome build 36.3; Refseq Release 29 (August 4, 2009); chr, chromosome, str, strand, bp, base pairs; TNFRSF18 and TNFRSF4 analyzed together with 10 joint tagSNPs; CD80 and CXCL10 share an eQTL SNP; IL9R, KIR3DS1, and TIMA1 were of interest, but were not included due to location on XY pseudo-autosomal region, lack of mapping to reference genome, and very large size, respectively; References: [1] N…
