# Supplementary material for: Inherited Variants in Regulatory T Cell Genes and Outcome of Ovarian Cancer
Source: PLoS One. 2013 Jan 30;8(1):e53903. doi: 10.1371/journal.pone.0053903 (PMC3559692; doi:10.1371/journal.pone.0053903)
Supplement: Table S2 — SNP information. (XLSX) [file pone.0053903.s002.xlsx]

## Sheet: Supplemental_Table_2
Table S2. SNP Information
tagSNPS							Candidate Gene Study			Genomewide Association Study
gene name	rsid	chr	position	Location (bp)	LD bin (N SNPs)	Alleles	Call Rate	HWE p	MAF	MAF	Impuation Quality	Imputation r2
ACVR2B	rs75221584	3	38468585	5' (2,209)	13 (1)	G>A	0.999	0.28	0.11	NA	NA	NA
ACVR2B	rs3749387	3	38471197	intron	5 (1)	G>C	0.999	0.03	0.48	NA	NA	NA
ACVR2B	rs2284817	3	38485392	intron	4 (2)	G>A	0.999	0.39	0.32	0.320597	0.9785	0.9573
ACVR2B	rs2268759	3	38489331	intron	6 (1)	A>G	0.999	0.36	0.42	0.405488	0.9502	0.9102
ACVR2B	rs76343599	3	38496100	intron	17 (1)	G>A	0.999	0.87	0.06	NA	NA	NA
ACVR2B	rs73065216	3	38499198	intron	8 (1)	C>G	1	0.35	0.24	NA	NA	NA
ACVR2B	rs503327	3	38499367	intron	11 (1)	G>A	1	0.59	0.1	0.0986625	0.9905	0.959
ACVR2B	rs7642472	3	38500571	3' UTR	1 (28)	G>A	0.999	0.05	0.44	0.421017	0.9923	0.9859
ACVR2B	rs6599204	3	38500738	3' UTR	2 (19)	A>G	1	0.14	0.39	NA	NA	NA
ACVR2B	rs7640050	3	38500868	3' UTR	1 (28)	C>A	1	0.06	0.44	0.421184	0.9924	0.986
ACVR2B	rs17037775	3	38502107	3' UTR	3 (16)	A>G	1	0.73	0.05	0.0431722	0.9942	0.9453
ACVR2B	rs62239939	3	38502727	3' UTR	3 (16)	A>G	0.999	0.72	0.05	NA	NA	NA
ACVR2B	rs11926767	3	38502917	3' UTR	2 (19)	A>G	1	0.15	0.39	0.378253	0.9978	0.9965
ACVR2B	rs62239941	3	38505083	3' UTR	3 (16)	A>G	0.997	0.73	0.05	NA	NA	NA
ACVR2B	rs7374458	3	38506215	3' UTR	2 (19)	C>A	1	0.16	0.39	0.378405	0.9986	0.9982
ACVR2B	rs62241768	3	38506775	3' UTR	3 (16)	G>A	1	0.73	0.05	NA	NA	NA
ACVR2B	rs1058945	3	38507515	3' UTR	1 (28)	A>G	0.999	0.07	0.44	0.421431	0.994	0.989
ACVR2B	rs13072731	3	38508339	3' UTR	2 (19)	C>A	1	0.16	0.39	0.378221	0.9978	0.9965
ACVR2B	rs78959106	3	38512241	3' (2,604)	15 (1)	G>A	0.999	1	0.03	NA	NA	NA
AGTR1	rs4681157	3	149895098	5' (3,250)	19 (1)	C>A	0.999	0.18	0.38	0.369482	0.9412	0.8999
AGTR1	rs2933250	3	149895303	5' (3,045)	12 (2)	G>A	0.999	0.75	0.21	0.193526	0.9541	0.8889
AGTR1	rs275651	3	149897577	5' (771)	1 (17)	A>T	1	0.92	0.18	0.175541	0.9773	0.9394
AGTR1	rs275652	3	149897674	5' (674)	1 (17)	A>C	1	0.92	0.18	0.175475	0.977	0.9383
AGTR1	rs3772633	3	149900858	intron	33 (1)	A>G	1	0.82	0.16	NA	NA	NA
AGTR1	rs2640540	3	149903946	intron	6 (4)	A>C	0.998	0.91	0.48	NA	NA	NA
AGTR1	rs76617537	3	149904311	intron	14 (1)	A>T	1	0.64	0.49	NA	NA	NA
AGTR1	rs2131127	3	149906833	intron	2 (15)	G>A	0.999	0.32	0.34	0.320752	0.9993	0.9984
AGTR1	rs58255592	3	149908096	intron	31 (1)	n.a.		Poor clustering		NA	NA	NA
AGTR1	rs7634874	3	149908887	intron	36 (1)	G>A	1	0.21	0.08	NA	NA	NA
AGTR1	rs7640374	3	149910352	intron	22 (1)	A>C	1	0.85	0.18	NA	NA	NA
AGTR1	rs7647324	3	149912818	intron	2 (15)	G>A	1	0.29	0.34	NA	NA	NA
AGTR1	rs4681441	3	149914742	intron	28 (1)	C>A	0.999	0.75	0.18	NA	NA	NA
AGTR1	rs2640543	3	149915059	intron	7 (3)	G>A	0.996	0.22	0.36	NA	NA	NA
AGTR1	rs4681443	3	149915159	intron	3 (11)	G>A	1	0.78	0.18	0.163911	0.9999	0.9999
AGTR1	rs3772625	3	149915422	intron	32 (1)	A>G	1	0.78	0.18	NA	NA	NA
AGTR1	rs718858	3	149918202	intron	3 (11)	G>A	0.997	0.78	0.18	0.162844	0.9995	0.9987
AGTR1	rs3772622	3	149918443	intron	16 (1)	A>G	1	0.54	0.43	NA	NA	NA
AGTR1	rs909383	3	149918896	intron	4 (9)	G>A	1	0.73	0.22	NA	NA	NA
AGTR1	rs114690992	3	149919770	intron	38 (1)	G>A	1	0.96	0.2	NA	NA	NA
AGTR1	rs1492099	3	149920193	intron	27 (1)	G>A	0.9899	0.15	0.14	0.139887	0.9935	0.9792
AGTR1	rs4488792	3	149922293	intron	26 (1)	G>A	1	0.81	0.2	NA	NA	NA
AGTR1	rs12721331	3	149927683	intron	35 (1)	A>G	0.999	0.61	0.07	0.0652289	0.9968	0.9805
AGTR1	rs388915	3	149930446	intron	8 (3)	A>G	1	0.14	0.27	NA	NA	NA
AGTR1	rs385338	3	149931846	intron	11 (2)	G>C	1	0.01	0.17	0.18198	0.9208	0.8082
AGTR1	rs12695915	3	149937737	intron	5 (7)	G>A	1	0.28	0.1	NA	NA	NA
AGTR1	rs6801836	3	149938227	intron	21 (1)	A>G	1	0.15	0.23	0.216124	0.9442	0.864
AGTR1	rs1800766	3	149940332	intron	24 (1)	A>G	1	0.0002	0.17	NA	NA	NA
AGTR1	rs5182	3	149942085	synonymous	17 (1)	G>A	0.999	0.88	0.46	0.463551	0.967	0.9399
AGTR1	rs5186	3	149942678	3' UTR	10 (2)	A>C	1	0.95	0.29	NA	NA	NA
AGTR1	rs5189	3	149943029	3' UTR	13 (2)	C>A	1	0.55	0.05	NA	NA	NA
AGTR1	rs61762945	3	149944062	3' (582)	34 (1)	T>A	1	0.25	0.1	NA	NA	NA
AGTR1	rs2320019	3	149945884	3' (2,404)	9 (3)	A>G	1	0.37	0.06	0.0627164	0.9785	0.8364
AGTR1	rs2055049	3	149945972	3' (2,492)	25 (1)	A>T	1	0.79	0.14	NA	NA	NA
AGTR1	rs275645	3	149947144	3' (3,664)	18 (1)	G>A	1	0.92	0.45	0.457894	0.9992	0.9985
AGTR1	rs12639531	3	149948041	3' (4,561)	29 (1)	A>T	0.998	0.23	0.09	0.0907784	0.963	0.829
CCL11	rs80219280	17	29634647	5' (2,153)	14 (1)	C>A	1	1	0.04	NA	NA	NA
CCL11	rs4795895	17	29635559	5' (1,241)	3 (3)	G>A	0.999	0.87	0.19	0.198216	0.9991	0.9974
CCL11	rs4795896	17	29636365	5' (435)	6 (2)	A>G	1	0.28	0.13	0.12375	0.9863	0.9425
CCL11	rs17735961	17	29636453	5' (347)	5 (2)	C>A	1	0.9	0.17	0.182348	0.9973	0.9921
CCL11	rs16969415	17	29636515	5' (285)	13 (1)	G>A	0.999	0.69	0.04	0.0514369	0.9982	0.983
CCL11	rs1129844	17	29637007	A23T	5 (2)	G>A	0.998	0.89	0.17	NA	NA	NA
CCL11	rs1860184	17	29637245	intron	4 (2)	T>A	0.999	0.7	0.29	0.27732	0.9931	0.9845
CCL11	rs41509752	17	29637531	intron	7 (2)	G>A	1	0.09	0.07	NA	NA	NA
CCL11	rs4795898	17	29638555	intron	10 (1)	A>G	0.999	0.33	0.09	0.0912138	0.9761	0.8887
CCL11	rs1019109	17	29639233	3' UTR	2 (3)	A>G	0.999	0.56	0.23	0.215504	0.9937	0.9845
CCL11	rs1860183	17	29641282	3' (1,970)	8 (1)	G>A	1	0.49	0.21	NA	NA	NA
CCL11	rs1860182	17	29641550	3' (2,238)	1 (10)	G>A	0.999	0.48	0.45	0.450392	0.9999	0.9999
CCL11	rs1860181	17	29641700	3' (2,388)	1 (10)	A>G	0.999	0.53	0.45	0.450438	0.9998	0.9997
CCL11	rs79722574	17	29643165	3' (3,853)	9 (1)	G>A	0.999	0.47	0.16	NA	NA	NA
CCL17	rs223892	16	55993654	5' (2,526)	12 (1)	A>G	1	0.41	0.1	0.101221	0.9998	0.9989
CCL17	rs72792973	16	55996234	5' UTR	1 (7)	G>A	1	0.72	0.05	NA	NA	NA
CCL17	rs11076191	16	55997089	intron	6 (1)	G>A	1	0.2	0.18	NA	NA	NA
CCL17	rs79789786	16	55998356	intron	7 (1)	n.a.		Poor clustering		NA	NA	NA
CCL17	rs76608756	16	55998724	intron	14 (1)	n.a.		Poor clustering		NA	NA	NA
CCL17	rs223896	16	56000647	intron	2 (4)	A>G	1	0.55	0.39	NA	NA	NA
CCL17	rs223899	16	56002077	intron	3 (4)	n.a.		Poor clustering		NA	NA	NA
CCL17	rs223900	16	56002877	intron	4 (3)	G>A	0.999	0.04	0.26	0.243917	0.9999	0.9999
CCL17	rs72792995	16	56003879	intron	13 (1)	G>A	1	1	0.03	NA	NA	NA
CCL17	rs223828	16	56004915	intron	11 (1)	G>A	1	0.11	0.06	0.0512767	0.9835	0.8587
CCL17	rs657181	16	56010908	3' (3,433)	5 (1)	A>G	0.999	0.31	0.41	NA	NA	NA
CCL17	rs223831	16	56011398	3' (3,923)	8 (1)	G>A	1	0.68	0.12	NA	NA	NA
CCL19	rs928150	9	34675940	3' (3,627)	4 (2)	G>A	1	0.1	0.2	0.199231	0.9996	0.9988
CCL19	rs2772559	9	34676157	3' (3,410)	7 (1)	A>G	0.999	0.98	0.5	0.472719	0.9652	0.9417
CCL19	rs6476459	9	34678033	3' (1,534)	8 (1)	A>G	0.999	0.84	0.49	NA	NA	NA
CCL19	rs3176817	9	34678366	3' (1,201)	2 (3)	G>A	1	0.87	0.27	0.272906	0.9774	0.9541
CCL19	rs3136658	9	34680400	intron	5 (2)	G>A	1	0.78	0.25	0.252383	0.9752	0.947
CCL19	rs3176813	9	34680811	intron	6 (2)	G>A	1	0.06	0.14	0.123613	0.9652	0.8813
CCL19	rs2233873	9	34681535	5' (261)	1 (9)	A>G	1	0.87	0.06	0.0637894	0.9752	0.8295
CCL19	rs10814132	9	34682506	5' (1,232)	3 (2)	A>C	0.9859	0.84	0.49	NA	NA	NA
CCL19	rs10972196	9	34683118	5' (1,844)	10 (1)	A>G	1	0.85	0.25	0.253958	0.9685	0.9344
CCL2	rs1860189	17	29602471	5' (3,938)	3 (2)	A>G	0.998	0.69	0.17	NA	NA	NA
CCL2	rs3917878	17	29602968	5' (3,441)	11 (1)	G>A	0.999	0.16	0.07	0.0729656	0.9964	0.9825
CCL2	rs3917879	17	29603042	5' (3,367)	9 (1)	n.a.		Poor clustering		NA	NA	NA
CCL2	rs3917882	17	29603912	5' (2,497)	10 (1)	n.a.		Poor clustering		NA	NA	NA
CCL2	rs3917903	17	29604071	5' (2,338)	13 (1)	G>C	0.999	0.68	0.04	NA	NA	NA
CCL2	rs3760399	17	29604671	5' (1,738)	4 (2)	A>G	0.999	0.68	0.04	0.0397812	0.9698	0.7193
CCL2	rs2857655	17	29605365	5' (1,044)	12 (1)	A>T	1	0.47	0.05	0.0754762	0.9284	0.6512
CCL2	rs3760396	17	29605554	5' (855)	8 (1)	G>C	0.999	0.96	0.23	0.215367	0.9744	0.9397
CCL2	rs2857656	17	29606120	5' (289)	1 (5)	C>G	0.999	0.76	0.28	0.274894	0.9987	0.9974
CCL2	rs2857657	17	29607245	intron	2 (2)	C>G	1	0.98	0.2	NA	NA	NA
CCL2	rs4586	17	29607382	synonymous	7 (1)	A>G	0.998	0.85	0.36	0.349907	0.9956	0.9921
CCL2	rs13900	17	29608024	3' UTR	1 (5)	G>A	0.999	0.83	0.28	NA	NA	NA
CCL2	rs2530797	17	29610207	3' (1,872)	6 (1)	A>G	1	0.73	0.36	0.37675	0.9645	0.9422
CCL2	rs3917900	17	29611427	3' (3,092)	5 (1)	A>G	1	0.67	0.36	NA	NA	NA
CCL20	rs62190005	2	228385166	5' (1,648)	4 (1)	G>A	1	0.51	0.13	NA	NA	NA
CCL20	rs7581135	2	228385414	5' (1,400)	7 (1)	n.a.		Poor clustering		NA	NA	NA
CCL20	rs6749704	2	228386086	5' (728)	1 (2)	A>G	1	0.62	0.27	0.297989	0.9012	0.825
CCL20	rs940339	2	228393506	3' (3,012)	2 (1)	G>A	0.999	0.89	0.48	0.482957	0.9964	0.9933
CCL22	rs8049203	16	55946091	5' (4,128)	11 (1)	A>T	0.998	0.36	0.15	NA	NA	NA
CCL22	rs669763	16	55947979	5' (2,240)	8 (1)	G>C	1	0.81	0.39	NA	NA	NA
CCL22	rs34885482	16	55948435	5' (1,784)	1 (9)	G>A	1	0.32	0.17	NA	NA	NA
CCL22	rs182668	16	55948892	5' (1,327)	10 (1)	n.a.		Poor clustering		NA	NA	NA
CCL22	rs223888	16	55949269	5' (950)	3 (2)	n.a.		Poor clustering		NA	NA	NA
CCL22	rs223889	16	55949742	5' (477)	2 (2)	G>A	0.998	0.23	0.28	0.285881	0.9878	0.9769
CCL22	rs4359426	16	55950234	D2A	13 (1)	C>A	1	0.06	0.06	0.0538692	0.9956	0.9684
CCL22	rs223818	16	55952259	intron	4 (2)	C>G	1	0.01	0.08	0.0706024	0.9917	0.952
CCL22	rs117986243	16	55954419	intron	16 (1)	n.a.		Poor clustering		NA	NA	NA
CCL22	rs170360	16	55955451	3' UTR	6 (2)	A>G	1	0.01	0.06	0.0549624	0.9943	0.9606
CCL22	rs121565	16	55956850	3' UTR	5 (2)	A>G	1	0.02	0.07	NA	NA	NA
CCL22	rs223825	16	55957472	3' UTR	15 (1)	G>A	0.998	0.04	0.06	0.0553579	0.993	0.9543
CCL22	rs118099875	16	55959687	3' (2,085)	12 (1)	n.a.		Poor clustering		NA	NA	NA
CCL3	rs1634491	17	31435370	3' (4,345)	7 (1)	n.a.		n.a.		NA	NA	NA
CCL3	rs1634492	17	31435952	3' (3,763)	4 (1)	n.a.		Call Rate < 95%		NA	NA	NA
CCL3	rs1851503	17	31436315	3' (3,400)	6 (1)	A>C	0.998	0.04	0.33	0.339357	0.9942	0.9894
CCL3	rs12601899	17	31437151	3' (2,564)	14 (1)	n.a.		Poor clustering		NA	NA	NA
CCL3	rs1879917	17	31437551	3' (2,164)	5 (1)	C>A	0.997	0.59	0.37	NA	NA	NA
CCL3	rs1719124	17	31437655	3' (2,060)	1 (14)	G>A	0.993	2.5e-10	0.21	NA	NA	NA
CCL3	rs2188973	17	31438748	3' (967)	8 (1)	A>G	0.996	0.3	0.25	NA	NA	NA
CCL3	rs764872	17	31439385	3' (330)	2 (3)	A>G	0.9718	0.04	0.37	NA	NA	NA
CCL3	rs1063340	17	31439876	3' UTR	9 (1)	G>C	1	0.49	0.25	NA	NA	NA
CCL3	rs1719134	17	31441059	intron	1 (14)	G>A	0.996	0	0.23	0.25189	0.9893	0.9769
CCL3	rs9972917	17	31442684	5' (1,065)	13 (1)	C>A	0.996	0.89	0.11	NA	NA	NA
CCL3	rs1634502	17	31444611	5' (2,992)	3 (2)	A>T	0.998	0.26	0.4	0.381396	0.9897	0.9818
CCL4	rs59797189	17	31453947	5' (1,386)	9 (1)	G>A	0.997	0.79	0.37	NA	NA	NA
CCL4	rs10491121	17	31454449	5' (884)	5 (2)	G>A	0.999	0.36	0.4	0.381445	0.9989	0.9982
CCL4	rs1719142	17	31454655	5' (678)	1 (20)	C>G	0.998	1	0.01	NA	NA	NA
CCL4	rs9896211	17	31454941	5' (392)	8 (2)	G>A	0.999	0.71	0.11	NA	NA	NA
CCL4	rs1719149	17	31456694	intron	7 (2)	n.a.		Poor clustering		NA	NA	NA
CCL4	rs17679451	17	31458431	3' (1,304)	3 (3)	G>A	1	1	0.04	0.0467961	0.9906	0.912
CCL4	rs62079742	17	31458658	3' (1,531)	19 (1)	A>G	0.9889	0.03	0.19	NA	NA	NA
CCL4	rs11080373	17	31459181	3' (2,054)	6 (2)	G>C	0.9748	0.73	0.31	NA	NA	NA
CCL4	rs9709233	17	31460431	3' (3,304)	11 (1)	n.a.		Poor clustering		NA	NA	NA
CCL4	rs916839	17	31461494	3' (4,367)	12 (1)	n.a.		HWE pval < .0001		NA	NA	NA
CCL4	rs1634522	17	31462117	3' (4,990)	2 (4)	C>A	0.994	3e-05	0.24	0.253812	0.9547	0.8886
CCL5	rs74539301	17	31218779	3' (3,829)	5 (1)	A>G	1	0.19	0.07	NA	NA	NA
CCL5	rs117438900	17	31230777	intron	6 (1)	n.a.		Poor clustering		NA	NA	NA
CCL5	rs2280789	17	31231116	intron	1 (12)	A>G	1	0.22	0.13	0.117097	0.9738	0.903
CCL5	rs2107538	17	31231893	5' (403)	2 (3)	G>A	1	0.59	0.19	0.171992	0.9667	0.9216
CCL5	rs4796123	17	31235573	5' (4,083)	1 (12)	A>G	1	0.68	0.12	0.112976	0.9651	0.8844
CCR4	rs4074331	3	32964013	5' (4,057)	3 (2)	A>T	1	0.04	0.43	NA	NA	NA
CCR4	rs7632357	3	32967207	5' (863)	1 (5)	A>C	0.998	0.04	0.43	0.417573	0.9905	0.9864
CCR4	rs2228428	3	32970932	synonymous	4 (1)	G>A	1	0.23	0.32	0.307935	0.9993	0.9986
CCR4	rs6807638	3	32975185	3' (3,778)	2 (5)	A>C	1	0.57	0.09	0.0852087	0.9953	0.9715
CCR6	rs9457273	6	167440739	5' (4,546)	14 (1)	A>T	0.998	0.54	0.44	0.457269	0.9854	0.9746
CCR6	rs9457274	6	167440855	5' (4,430)	6 (3)	C>A	0.999	0.77	0.5	0.492944	0.9859	0.9754
CCR6	rs56019630	6	167441461	5' (3,824)	38 (1)	A>G	1	0.17	0.05	NA	NA	NA
CCR6	rs6905876	6	167441552	5' (3,733)	8 (2)	G>A	0.999	0.36	0.41	0.405623	0.937	0.8965
CCR6	rs4709148	6	167441666	5' (3,619)	15 (1)	A>G	1	0.87	0.46	0.455049	0.9405	0.9049
CCR6	rs4710185	6	167442376	5' (2,909)	24 (1)	G>A	0.9879	0.74	0.36	0.378593	0.9949	0.9905
CCR6	rs6907666	6	167443385	5' (1,900)	21 (1)	G>A	0.999	0.81	0.39	0.404623	0.9957	0.9918
CCR6	rs9348223	6	167444379	5' (906)	7 (3)	A>G	0.999	0.09	0.06	0.0503053	0.9955	0.9614
CCR6	rs55843050	6	167444604	5' (681)	35 (1)	T>A	1	0.42	0.08	NA	NA	NA
CCR6	rs968334	6	167446086	intron	16 (1)	G>A	1	0.38	0.44	0.441129	0.9939	0.9883
CCR6	rs6909252	6	167447087	intron	1 (22)	G>A	1	0.98	0.47	0.475025	0.9885	0.9794
CCR6	rs11967165	6	167449926	intron	17 (1)	A>G	0.998	0.89	0.47	NA	NA	NA
CCR6	rs9459883	6	167450507	intron	5 (4)	C>G	1	0.13	0.1	0.0843583	0.9929	0.9638
CCR6	rs17860840	6	167453626	intron	39 (1)	G>A	0.999	0.05	0.06	NA	NA	NA
CCR6	rs1571878	6	167460832	intron	3 (10)	A>G	0.999	0.28	0.43	0.437291	0.9522	0.9146
CCR6	rs41401944	6	167461828	intron	37 (1)	G>A	0.997	1	0	NA	NA	NA
CCR6	rs11575078	6	167464268	intron	13 (1)	G>C	1	0.97	0.47	NA	NA	NA
CCR6	rs41351044	6	167464410	intron	33 (1)	T>A	1	0.14	0.01	NA	NA	NA
CCR6	rs3798315	6	167464699	intron	30 (1)	G>A	1	0.18	0.13	0.118389	0.9954	0.9814
CCR6	rs3798316	6	167464819	intron	25 (1)	A>G	1	0.54	0.29	NA	NA	NA
CCR6	rs41463945	6	167464897	intron	36 (1)	A>G	0.9829	0.07	0.08	NA	NA	NA
CCR6	rs3093015	6	167465062	intron	19 (1)	C>G	0.999	0.64	0.4	NA	NA	NA
CCR6	rs4709149	6	167465237	intron	12 (1)	C>A	0.999	0.82	0.5	NA	NA	NA
CCR6	rs3093012	6	167468271	intron	20 (1)	G>A	0.999	0.54	0.41	0.43112	0.9804	0.9657
CCR6	rs3093010	6	167468597	intron	28 (1)	C>A	1	0.37	0.33	0.321373	0.9318	0.8765
CCR6	rs3093009	6	167469467	intron	29 (1)	A>G	0.9819	0.46	0.23	0.223938	0.9931	0.9864
CCR6	rs3093007	6	167469765	synonymous	32 (1)	A>G	1	0.23	0.19	0.193386	0.9988	0.9969
CCR6	rs2071171	6	167470032	synonymous	22 (1)	A>G	0.993	0.74	0.38	0.368027	0.9557	0.9192
CCR6	rs6931699	6	167471241	3' UTR	2 (17)	T>A	0.9769	1	0.02	0.0255814	0.9934	0.9042
CCR6	rs3093006	6	167471442	3' UTR	31 (1)	G>A	0.999	0.45	0.12	0.135599	0.9509	0.8415
CCR6	rs3093005	6	167471663	3' UTR	2 (17)	A>G	1	1	0.02	0.0246387	0.9955	0.926
CCR6	rs11575083	6	167472103	3' UTR	2 (17)	G>A	1	1	0.02	0.0241771	0.997	0.9446
CCR6	rs3093002	6	167474050	3' (1,431)	10 (2)	G>A	1	0.4	0.31	0.309526	0.9678	0.9347
CCR6	rs3093001	6	167474175	3' (1,556)	18 (1)	A>C	1	0.7	0.5	0.499992	0.9554	0.9235
CCR6	rs4710187	6	167475082	3' (2,463)	27 (1)	G>A	1	0.27	0.32	0.310078	0.9922	0.9833
CCR6	rs4710188	6	167475145	3' (2,526)	9 (2)	A>G	0.999	0.11	0.34	0.334921	0.996	0.992
CCR6	rs6903856	6	167476559	3' (3,940)	4 (4)	A>G	0.999	0.74	0.34	NA	NA	NA
CCR6	rs11575088	6	167477024	3' (4,405)	11 (2)	C>A	1	0.29	0.19	0.19489	0.9853	0.9633
CCR6	rs9355616	6	167477512	3' (4,893)	23 (1)	A>G	0.995	0.02	0.07	0.35584	0.9998	0.9996
CCR7	rs56320214	17	35963361	3' (186)	7 (1)	G>A	1	0.19	0.04	NA	NA	NA
CCR7	rs2023906	17	35967212	intron	2 (1)	A>G	1	0.38	0.25	0.260764	0.9977	0.9942
CCR7	rs588019	17	35968633	intron	5 (1)	G>A	1	0.54	0.08	0.112342	0.8441	0.3938
CCR7	rs72819672	17	35972259	intron	8 (1)	G>A	0.993	1	0	NA	NA	NA
CCR7	rs3136685	17	35973325	intron	4 (1)	G>A	0.996	0.56	0.16	0.160482	0.9953	0.9856
CCR7	rs62066594	17	35975726	5' (476)	3 (1)	G>A	0.999	0.11	0.26	NA	NA	NA
CCR7	rs75983909	17	35977451	5' (2,201)	6 (1)	G>A	1	0.5	0.03	NA	NA	NA
CCR7	rs55688204	17	35979477	5' (4,227)	1 (5)	A>G	1	0.38	0.38	NA	NA	NA
CCR8	rs17038748	3	39341544	5' (4,675)	4 (1)	A>C	0.998	0.67	0.26	0.273996	0.9691	0.9364
CCR8	rs872066	3	39343525	5' (2,694)	2 (3)	A>G	1	0.48	0.11	0.106805	0.9897	0.9547
CCR8	rs2853699	3	39348906	A27G	1 (5)	C>G	1	0.22	0.29	0.309946	0.9938	0.9855
CCR8	rs13082658	3	39351088	3' (11)	3 (2)	A>G	0.997	0.49	0.32	NA	NA	NA
CCR8	rs3136662	3	39352807	3' (1,730)	5 (1)	n.a.		Poor clustering		NA	NA	NA
CCR8	rs56302036	3	39353400	3' (2,323)	8 (1)	n.a.		Poor clustering		NA	NA	NA
CD274	rs4742095	9	5435990	5' (4,569)	28 (1)	C>A	0.999	0.14	0.11	0.102984	0.9984	0.9929
CD274	rs10975121	9	5436078	5' (4,481)	13 (2)	A>G	1	0.66	0.11	NA	NA	NA
CD274	rs702275	9	5436388	5' (4,171)	6 (3)	C>A	1	0.65	0.44	0.478249	0.9801	0.966
CD274	rs34477738	9	5437227	5' (3,332)	21 (1)	A>G	1	0.11	0.17	NA	NA	NA
CD274	rs822335	9	5438218	5' (2,341)	11 (2)	G>A	0.999	0.7	0.33	NA	NA	NA
CD274	rs7866740	9	5440529	5' (30)	9 (3)	n.a.		Poor clustering		NA	NA	NA
CD274	rs117829760	9	5440790	intron	32 (1)	C>A	1	0.43	0.04	NA	NA	NA
CD274	rs2890657	9	5442560	intron	12 (2)	G>C	0.998	0.86	0.19	NA	NA	NA
CD274	rs822339	9	5443172	intron	19 (1)	G>A	0.9869	0.99	0.24	0.259108	0.9983	0.9961
CD274	rs822340	9	5443260	intron	1 (10)	G>A	1	0.76	0.24	0.259992	0.9965	0.9932
CD274	rs79855302	9	5443460	intron	29 (1)	G>A	1	0.02	0.05	NA	NA	NA
CD274	rs4742097	9	5445632	intron	5 (4)	G>A	1	0.61	0.5	0.466939	0.9995	0.999
CD274	rs2282055	9	5445732	intron	1 (10)	A>C	1	0.88	0.25	0.261507	0.9994	0.9988
CD274	rs7023227	9	5446550	intron	16 (1)	G>A	1	0.41	0.43	0.407066	0.9777	0.965
CD274	rs78745832	9	5448585	intron	25 (1)	G>A	0.999	0.4	0.08	NA	NA	NA
CD274	rs6651525	9	5448847	intron	22 (1)	C>A	1	0.84	0.18	NA	NA	NA
CD274	rs1411263	9	5449103	intron	3 (5)	A>G	1	0.28	0.23	0.243963	0.995	0.9894
CD274	rs10975123	9	5451379	intron	8 (3)	G>A	1	0.87	0.18	0.190183	0.9959	0.9904
CD274	rs1536926	9	5453988	intron	2 (7)	C>A	1	0.92	0.47	0.499729	0.9941	0.9913
CD274	rs3780394	9	5454376	intron	10 (3)	A>C	1	0.01	0.06	NA	NA	NA
CD274	rs3780395	9	5454552	intron	17 (1)	G>A	1	0.5	0.41	0.386665	0.8937	0.8289
CD274	rs2890658	9	5455130	intron	31 (1)	C>A	0.999	0.18	0.09	0.0826054	0.9675	0.8427
CD274	rs2297137	9	5455732	intron	20 (1)	G>A	1	0.44	0.22	0.219247	0.9024	0.7962
CD274	rs59906468	9	5456085	intron	23 (1)	A>G	1	0.95	0.22	NA	NA	NA
CD274	rs74791855	9	5457256	intron	30 (1)	A>G	0.999	0.71	0.04	NA	NA	NA
CD274	rs41303227	9	5457801	intron	4 (5)	G>A	1	0.1	0.06	NA	NA	NA
CD274	rs2297136	9	5457955	3' UTR	14 (1)	G>A	0.999	0.32	0.49	0.468255	0.8196	0.7113
CD274	rs4143815	9	5458257	3' UTR	18 (1)	G>C	0.9859	0.14	0.28	0.272377	0.8854	0.765
CD274	rs4742100	9	5460954	3' (2,477)	7 (3)	A>C	1	0.39	0.23	0.23632	0.9859	0.9644
CD274	rs6476976	9	5461514	3' (3,037)	15 (1)	A>G	1	0.55	0.47	NA	NA	NA
CD46	rs72746365	1	205990803	5' (1,222)	12 (1)	n.a.		Call Rate < 95%		NA	NA	NA
CD46	rs11118514	1	205990894	5' (1,131)	7 (3)	G>C	1	0.98	0.06	NA	NA	NA
CD46	rs2796267	1	205991529	5' (496)	10 (1)	A>G	1	0.6	0.4	0.403459	0.9992	0.9987
CD46	rs2796268	1	205991815	5' (210)	1 (24)	A>G	1	0.96	0.42	NA	NA	NA
CD46	rs35029161	1	205993776	intron	4 (5)	A>G	1	0.71	0.13	NA	NA	NA
CD46	rs41316817	1	205993854	intron	2 (19)	C>G	0.995	0.23	0.07	NA	NA	NA
CD46	rs41317049	1	205996646	intron	17 (1)	A>C	1	0.91	0.13	NA	NA	NA
CD46	rs2724384	1	205996826	intron	3 (9)	A>G	0.997	0.12	0.21	0.223669	0.996	0.9893
CD46	rs35677203	1	205998619	intron	23 (1)	T>A	1	0.71	0.08	NA	NA	NA
CD46	rs17006738	1	206002726	intron	22 (1)	G>A	0.997	0.08	0.05	0.0532044	0.9986	0.9894
CD46	rs2796269	1	206003509	intron	11 (1)	G>A	0.999	0.54	0.33	0.339672	0.999	0.998
CD46	rs78003922	1	206003829	intron	16 (1)	n.a.		HWE pval < .0001		NA	NA	NA
CD46	rs7545126	1	206004859	intron	18 (1)	G>A	1	0.66	0.12	0.103828	0.9786	0.9137
CD46	rs2466571	1	206006669	intron	5 (4)	A>C	0.995	0.55	0.48	0.4731	0.998	0.9966
CD46	rs2796272	1	206009735	intron	8 (1)	n.a.		Poor clustering		NA	NA	NA
CD46	rs116506263	1	206012083	intron	19 (1)	n.a.		Poor clustering		NA	NA	NA
CD46	rs115241964	1	206019881	intron	14 (1)	n.a.		Poor clustering		NA	NA	NA
CD46	rs2796278	1	206022446	intron	9 (1)	A>C	0.9879	0.45	0.48	0.483371	0.9667	0.9501
CD46	rs7541230	1	206024178	intron	6 (4)	A>G	0.999	0.77	0.34	0.336234	0.9922	0.985
CD46	rs11806810	1	206024717	intron	25 (1)	n.a.		Poor clustering		NA	NA	NA
CD46	rs7144	1	206034342	3' UTR	1 (24)	A>G	1	0.87	0.42	0.409092	0.9961	0.9933
CD46	rs14374	1	206034880	3' UTR	20 (1)	A>G	1	0.15	0.05	0.0466767	0.9889	0.8932
CD46	rs1237	1	206035320	3' UTR	2 (19)	A>C	1	0.53	0.07	NA	NA	NA
CD80	rs35488908	3	120723640	3' (2,190)	17 (2)	G>A	0.997	0.32	0.2	NA	NA	NA
CD80	rs115050005	3	120724341	3' (1,489)	53 (1)	n.a.		Poor clustering		NA	NA	NA
CD80	rs17281703	3	120726239	3' UTR	45 (1)	G>A	1	0.53	0.11	0.120538	0.9721	0.8943
CD80	rs1599795	3	120726545	3' UTR	8 (3)	T>A	1	0.76	0.18	0.195577	0.9996	0.9986
CD80	rs1599796	3	120726624	3' UTR	8 (3)	G>A	1	0.76	0.18	0.195621	1	1
CD80	rs7628626	3	120727111	3' UTR	34 (1)	C>A	1	0.09	0.2	0.171172	0.9976	0.9925
CD80	rs57271503	3	120727283	3' UTR	9 (3)	G>A	1	0.32	0.19	NA	NA	NA
CD80	rs17203188	3	120728406	intron	29 (1)	G>A	1	0.19	0.24	NA	NA	NA
CD80	rs10934493	3	120728647	intron	11 (3)	G>A	1	0.75	0.06	0.0434242	0.9993	0.9937
CD80	rs77922702	3	120729167	intron	10 (3)	A>G	1	0.56	0.06	NA	NA	NA
CD80	rs6778945	3	120729517	intron	18 (2)	G>A	1	0.17	0.14	0.127674	1	0.9999
CD80	rs9855093	3	120731011	intron	20 (1)	G>A	0.999	0.09	0.48	0.459055	0.9982	0.997
CD80	rs2629396	3	120731657	intron	7 (3)	A>C	1	0.16	0.38	0.39668	0.9999	0.9997
CD80	rs11712863	3	120732349	intron	24 (1)	A>G	0.9879	0.09	0.37	NA	NA	NA
CD80	rs1797839	3	120732561	intron	32 (1)	n.a.		Poor clustering		NA	NA	NA
CD80	rs4688014	3	120733580	intron	25 (1)	G>A	1	0.18	0.32	0.284669	0.9995	0.9991
CD80	rs80311270	3	120734035	intron	49 (1)	G>A	0.995	0.11	0.48	NA	NA	NA
CD80	rs610902	3	120734475	intron	23 (1)	C>A	1	0.71	0.41	0.387329	0.9943	0.9903
CD80	rs112225152	3	120734641	intron	57 (1)	C>G	0.9889	0.3	0.03	NA	NA	NA
CD80	rs35505447	3	120735537	intron	50 (1)	G>A	1	0.08	0.09	NA	NA	NA
CD80	rs35181777	3	120736779	intron	47 (1)	A>G	1	0.05	0.1	NA	NA	NA
CD80	rs624035	3	120739769	intron	28 (1)	G>A	0.999	0.97	0.27	0.274527	0.9994	0.9989
CD80	rs7653123	3	120740376	intron	3 (7)	A>G	1	0.06	0.11	0.130958	0.9998	0.9991
CD80	rs61400421	3	120740492	intron	40 (1)	A>C	1	0.84	0.17	NA	NA	NA
CD80	rs59804878	3	120741013	intron	12 (3)	n.a.		Poor clustering		NA	NA	NA
CD80	rs28653390	3	120741853	intron	43 (1)	G>A	0.998	0.97	0.15	NA	NA	NA
CD80	rs6804441	3	120743634	intron	5 (6)	A>G	1	0.84	0.17	0.174381	0.9996	0.9986
CD80	rs7648642	3	120744065	intron	13 (2)	A>C	1	0.34	0.46	0.481467	0.998	0.9971
CD80	rs116015372	3	120745424	intron	48 (1)	n.a.		Poor clustering		NA	NA	NA
CD80	rs9282638	3	120746460	intron	2 (9)	A>G	0.999	0.09	0.13	NA	NA	NA
CD80	rs59789079	3	120747544	intron	19 (2)	C>A	1	0.93	0.17	NA	NA	NA
CD80	rs1720151	3	120748517	intron	4 (6)	A>G	1	0.64	0.27	0.246115	0.9912	0.9812
CD80	rs13071247	3	120749483	intron	38 (1)	A>C	1	0.23	0.14	0.156632	0.9927	0.9778
CD80	rs16829957	3	120749992	intron	26 (1)	G>A	0.999	0.42	0.33	0.331164	0.998	0.9965
CD80	rs79534834	3	120750183	intron	6 (5)	G>A	1	0.74	0.15	NA	NA	NA
CD80	rs34321347	3	120751522	intron	16 (2)	A>C	1	0.08	0.15	NA	NA	NA
CD80	rs527004	3	120751802	intron	33 (1)	G>A	1	0.89	0.24	0.248968	0.999	0.9978
CD80	rs2222631	3	120755081	intron	21 (1)	G>A	0.9859	0.52	0.49	0.460453	0.9884	0.9816
CD80	rs626364	3	120755573	intron	22 (1)	G>A	1	0.77	0.46	0.462484	0.9978	0.9965
CD80	rs2670289	3	120757276	intron	15 (2)	A>C	1	0.32	0.26	0.238923	0.9993	0.9984
CD80	rs1852211	3	120757439	intron	37 (1)	G>A	1	0.74	0.21	0.208741	0.9958	0.9899
CD80	rs6807532	3	120757531	intron	51 (1)	G>A	1	0.28	0.06	0.0558197	0.974	0.8234
CD80	rs1485332	3	120757611	intron	36 (1)	C>G	0.998	0.62	0.2	0.207021	0.9584	0.8984
CD80	rs6810204	3	120757788	intron	46 (1)	G>A	1	0.74	0.09	0.0950232	0.9911	0.957
CD80	rs78271199	3	120757926	intron	54 (1)	C>G	0.999	1	0.04	NA	NA	NA
CD80	rs73189874	3	120758053	intron	56 (1)	A>G	0.999	1	0.05	NA	NA	NA
CD80	rs1385520	3	120758315	intron	35 (1)	A>G	1	0.06	0.2	0.221238	0.92	0.8379
CD80	rs16829980	3	120761158	5' UTR	1 (22)	A>G	0.999	0.39	0.11	NA	NA	NA
CD80	rs16829984	3	120761230	5' (59)	44 (1)	G>C	1	0.24	0.12	0.109841	0.9182	0.7003
CD80	rs41271393	3	120761383	5' (212)	1 (22)	G>A	1	0.37	0.11	NA	NA	NA
CD80	rs1880661	3	120761538	5' (367)	14 (2)	G>A	1	0.49	0.45	0.424066	0.9938	0.9905
CD80	rs68180496	3	120761605	5' (434)	1 (22)	C>A	1	0.37	0.11	NA	NA	NA
CD80	rs34394661	3	120761838	5' (667)	1 (22)	n.a.		Poor clustering		NA	NA	NA
CD80	rs114389356	3	120761909	5' (738)	52 (1)	n.a.		Poor clustering		NA	NA	NA
CD80	rs3915166	3	120761971	5' (800)	1 (22)	A>G	1	0.37	0.11	0.116627	0.9969	0.989
CD80	rs3915165	3	120762041	5' (870)	1 (22)	C>A	1	0.37	0.11	0.116441	0.9967	0.9887
CD80	rs72953001	3	120762499	5' (1,328)	42 (1)	n.a.		Poor clustering		NA	NA	NA
CD86	rs77832668	3	123252548	5' (4,363)	8 (3)	A>G	0.999	0.12	0.1	NA	NA	NA
CD86	rs2255214	3	123253229	5' (3,682)	11 (2)	C>A	1	0.62	0.49	0.493812	0.9978	0.9963
CD86	rs36006255	3	123253334	5' (3,577)	29 (1)	C>A	0.9839	0.81	0.15	NA	NA	NA
CD86	rs2715267	3	123253548	5' (3,363)	24 (1)	A>C	0.999	0.4	0.36	0.355443	0.9999	0.9998
CD86	rs114242768	3	123254133	5' (2,778)	33 (1)	n.a.		Poor clustering		NA	NA	NA
CD86	rs34647267	3	123260722	intron	3 (7)	A>G	0.999	0.33	0.09	NA	NA	NA
CD86	rs115653212	3	123261588	intron	42 (1)	A>G	1	1	0.03	NA	NA	NA
CD86	rs2681404	3	123261660	intron	1 (12)	A>G	1	1	0.14	0.138421	0.9912	0.9707
CD86	rs17203397	3	123264116	intron	12 (2)	A>G	1	0.75	0.41	0.403471	0.9825	0.9688
CD86	rs2715274	3	123264413	intron	2 (7)	A>G	1	0.79	0.19	0.197485	1	0.9999
CD86	rs75937181	3	123265705	intron	4 (5)	A>C	0.996	0.37	0.09	NA	NA	NA
CD86	rs9872483	3	123265783	intron	36 (1)	A>G	0.999	0.41	0.1	0.104098	0.9957	0.9784
CD86	rs13095010	3	123267221	intron	44 (1)	A>G	1	0.85	0.06	0.070316	0.9799	0.897
CD86	rs2681411	3	123268321	intron	22 (1)	A>G	1	0.82	0.39	0.399103	0.9989	0.9984
CD86	rs116154252	3	123272701	intron	14 (2)	G>A	1	0.12	0.18	NA	NA	NA
CD86	rs4308217	3	123275877	intron	21 (1)	C>A	1	0.66	0.34	0.334713	0.9999	0.9998
CD86	rs36226874	3	123278450	intron	45 (1)	G>A	0.999	0.27	0.06	NA	NA	NA
CD86	rs2715261	3	123281267	intron	1 (12)	G>A	1	0.79	0.14	0.136148	0.9998	0.9993
CD86	rs2681422	3	123282244	intron	32 (1)	G>A	0.999	0.5	0.11	0.101846	0.9773	0.9175
CD86	rs9831894	3	123283177	intron	18 (1)	A>C	0.999	0.2	0.42	0.397701	0.9994	0.9989
CD86	rs11717893	3	123289515	intron	27 (1)	A>G	1	0.34	0.25	0.258381	0.9996	0.9992
CD86	rs2715280	3	123291484	intron	30 (1)	G>A	0.995	0.91	0.14	NA	NA	NA
CD86	rs78726365	3	123292592	intron	15 (2)	G>A	1	0.92	0.14	NA	NA	NA
CD86	rs9836399	3	123294501	intron	7 (3)	G>A	1	0.94	0.43	0.454448	0.9882	0.9801
CD86	rs13064913	3	123297201	intron	16 (2)	A>G	0.999	0.39	0.11	0.131675	0.9826	0.9375
CD86	rs34861031	3	123298126	intron	39 (1)	A>G	0.998	0.92	0.14	NA	NA	NA
CD86	rs2681415	3	123298305	intron	17 (2)	A>G	0.9809	0.7	0.12	0.145762	0.9823	0.949
CD86	rs76600394	3	123298413	intron	38 (1)	C>A	1	0.86	0.13	NA	NA	NA
CD86	rs2681416	3	123300303	intron	23 (1)	G>A	0.999	0.82	0.31	NA	NA	NA
CD86	rs62269247	3	123301652	intron	6 (4)	G>A	0.999	0.55	0.11	NA	NA	NA
CD86	rs1915092	3	123306065	intron	20 (1)	T>A	1	0.62	0.45	0.409909	0.9136	0.867
CD86	rs3804588	3	123306847	intron	34 (1)	C>A	0.996	0.01	0.11	0.0931526	0.952	0.7844
CD86	rs111278301	3	123308372	intron	41 (1)	G>A	0.996	1	0.03	NA	NA	NA
CD86	rs13090719	3	123308472	intron	37 (1)	A>C	0.998	0.54	0.1	NA	NA	NA
CD86	rs2254911	3	123311527	intron	43 (1)	G>A	1	0.3	0.06	0.0611217	0.9754	0.8286
CD86	rs76215842	3	123312036	intron	9 (3)	G>A	1	1	0.03	NA	NA	NA
CD86	rs9848900	3	123314187	intron	28 (1)	A>G	1	0.04	0.25	0.266266	0.9997	0.9993
CD86	rs2681420	3	123316747	intron	13 (2)	A>G	0.999	0.41	0.19	NA	NA	NA
CD86	rs1129055	3	123321009	A310T	5 (4)	G>A	0.999	0.75	0.27	0.269416	0.9997	0.9993
CD86	rs114231531	3	123321409	3' UTR	40 (1)	n.a.		Poor clustering		NA	NA	NA
CD86	rs1915087	3	123321481	3' UTR	25 (1)	A>G	1	0.73	0.33	0.314358	0.9857	0.9776
CD86	rs17281995	3	123322331	3' UTR	31 (1)	C>G	0.996	0.46	0.14	0.142986	0.9227	0.7487
CD86	rs2681401	3	123325817	3' (3,144)	10 (2)	C>A	1	0.36	0.42	0.41218	0.997	0.9946
CD86	rs79656993	3	123326806	3' (4,133)	35 (1)	T>A	1	0.46	0.1	NA	NA	NA
CXCL10	rs72653615	4	77158183	3' (3,112)	10 (1)	C>G	1	0.54	0.06	NA	NA	NA
CXCL10	rs4859583	4	77160144	3' (1,151)	9 (1)	A>T	0.999	0.42	0.04	0.0541194	0.9241	0.4064
CXCL10	rs3921	4	77161967	3' UTR	1 (20)	C>G	0.999	0.58	0.47	0.467964	0.9732	0.9524
CXCL10	rs4859584	4	77162161	intron	1 (20)	C>G	0.996	0.64	0.47	0.467923	0.9744	0.9543
CXCL10	rs4256246	4	77164546	5' (872)	8 (1)	G>A	1	0.53	0.16	0.154236	0.9872	0.962
CXCL10	rs4508917	4	77165121	5' (1,447)	6 (1)	A>G	0.999	0.56	0.28	0.290647	0.9851	0.9656
CXCL10	rs56039229	4	77166066	5' (2,392)	2 (3)	C>A	1	0.13	0.08	NA	NA	NA
CXCL10	rs12504339	4	77166328	5' (2,654)	5 (1)	n.a.		Call Rate < 95%		NA	NA	NA
CXCL10	rs4859592	4	77167688	5' (4,014)	7 (1)	G>A	0.997	0.72	0.48	NA	NA	NA
CXCL13	rs726173	4	78648519	5' (3,412)	16 (1)	n.a.		HWE pval < .0001		NA	NA	NA
CXCL13	rs6852819	4	78649096	5' (2,835)	26 (1)	C>A	1	0.54	0.2	0.0842784	0.8847	0.4333
CXCL13	rs34590214	4	78649200	5' (2,731)	34 (1)	A>G	1	0.81	0.07	NA	NA	NA
CXCL13	rs75639832	4	78649846	5' (2,085)	35 (1)	n.a.		Poor clustering		NA	NA	NA
CXCL13	rs1899471	4	78652790	intron	27 (1)	n.a.		Poor clustering		NA	NA	NA
CXCL13	rs17406477	4	78675526	intron	9 (3)	G>A	1	0.19	0.11	0.0962684	0.9615	0.8277
CXCL13	rs1077234	4	78678385	intron	19 (1)	A>G	0.999	0.24	0.22	0.243001	0.9411	0.8761
CXCL13	rs1500500	4	78680272	intron	3 (7)	C>G	1	0.03	0.34	0.339569	0.9422	0.8958
CXCL13	rs75129840	4	78692610	intron	32 (1)	G>A	1	0.93	0.08	NA	NA	NA
CXCL13	rs355674	4	78693113	intron	6 (4)	A>G	1	0.14	0.23	0.2405	0.9414	0.8796
CXCL13	rs355675	4	78693935	intron	17 (1)	A>G	1	0.59	0.27	0.259069	0.9299	0.8608
CXCL13	rs189586	4	78701407	intron	8 (4)	G>A	1	0.32	0.18	0.18142	0.9566	0.8813
CXCL13	rs1827264	4	78718261	intron	5 (4)	n.a.		Poor clustering		NA	NA	NA
CXCL13	rs355682	4	78721201	intron	31 (1)	G>A	0.999	0.89	0.07	0.0258379	0.9697	0.5311
CXCL13	rs355684	4	78722987	intron	7 (4)	A>G	0.999	0.12	0.24	0.237074	0.9975	0.995
CXCL13	rs355686	4	78724396	intron	12 (2)	G>A	1	0.3	0.2	0.189261	0.9987	0.9969
CXCL13	rs355689	4	78726821	intron	18 (1)	A>G	1	0.61	0.28	0.279992	0.994	0.9874
CXCL13	rs920666	4	78730227	intron	4 (5)	A>G	1	0.36	0.26	0.248787	0.9971	0.9935
CXCL13	rs41349845	4	78733973	intron	1 (8)	C>A	1	0.22	0.11	NA	NA	NA
CXCL13	rs62304088	4	78735378	intron	10 (3)	C>A	1	0.12	0.09	NA	NA	NA
CXCL13	rs924499	4	78737775	intron	28 (1)	G>C	1	0.95	0.18	NA	NA	NA
CXCL13	rs355661	4	78742116	intron	14 (2)	A>G	1	1	0.04	0.0398798	0.9888	0.8821
CXCL13	rs62304093	4	78744813	intron	13 (2)	A>G	1	0.55	0.16	NA	NA	NA
CXCL13	rs1052563	4	78751256	3' UTR	2 (8)	A>G	1	0.5	0.11	0.108759	0.9849	0.927
CXCL13	rs10022693	4	78752276	3' (266)	23 (1)	A>G	1	0.49	0.29	0.23407	0.9244	0.8424
CXCL13	rs75253711	4	78754046	3' (2,036)	33 (1)	G>A	1	0.5	0.11	NA	NA	NA
CXCL13	rs62304098	4	78755802	3' (3,792)	29 (1)	n.a.		HWE pval < .0001		NA	NA	NA
CXCL13	rs12647197	4	78756569	3' (4,559)	25 (1)	A>G	1	0.19	0.24	0.239315	0.9078	0.8109
CXCR5	rs76461823	11	118255165	5' (4,612)	17 (1)	n.a.		Poor clustering		NA	NA	NA
CXCR5	rs11217078	11	118255531	5' (4,246)	9 (1)	A>G	0.998	0.45	0.32	0.361919	0.9467	0.9154
CXCR5	rs10892306	11	118256536	5' (3,241)	16 (1)	A>T	1	0.9	0.07	0.0608765	0.9524	0.6919
CXCR5	rs60651507	11	118257108	5' (2,669)	18 (1)	G>A	0.999	0.11	0.04	NA	NA	NA
CXCR5	rs61150131	11	118257388	5' (2,389)	22 (1)	A>G	1	0.15	0.05	NA	NA	NA
CXCR5	rs630923	11	118259563	5' (214)	13 (1)	C>A	1	0.34	0.15	0.160599	0.9972	0.9913
CXCR5	rs10892307	11	118259859	5' UTR	3 (2)	G>C	1	0.4	0.16	0.179221	0.949	0.8642
CXCR5	rs523604	11	118260948	intron	6 (1)	A>G	1	0.11	0.45	0.479211	0.9984	0.9971
CXCR5	rs1623316	11	118262429	intron	8 (1)	G>C	1	0.84	0.36	0.350394	0.7886	0.6385
CXCR5	rs3176912	11	118262998	intron	19 (1)	G>A	1	0.45	0.02	NA	NA	NA
CXCR5	rs497916	11	118263299	intron	10 (1)	n.a.		Poor clustering		NA	NA	NA
CXCR5	rs566416	11	118264820	intron	12 (1)	A>C	1	0.14	0.24	0.239754	0.9985	0.9966
CXCR5	rs76457018	11	118267911	intron	15 (1)	G>A	0.999	0.84	0.13	NA	NA	NA
CXCR5	rs12363277	11	118268946	intron	14 (1)	A>G	1	0.8	0.06	0.0851509	0.9608	0.8013
CXCR5	rs613791	11	118269261	intron	2 (2)	G>A	1	0.11	0.27	0.266574	0.9738	0.9478
CXCR5	rs665648	11	118270493	G344S	21 (1)	n.a.		Poor clustering		NA	NA	NA
CXCR5	rs3922	11	118270810	3' UTR	1 (3)	A>G	1	0.06	0.42	0.420486	0.9938	0.989
CXCR5	rs676925	11	118270898	3' UTR	11 (1)	G>C	0.996	0.09	0.26	0.25487	0.9607	0.9175
CXCR5	rs581063	11	118272287	3' (106)	7 (1)	A>G	0.993	0.03	0.45	NA	NA	NA
CXCR5	rs11217083	11	118275531	3' (3,350)	5 (1)	n.a.		Call Rate < 95%		NA	NA	NA
DUSP4	rs10100468	8	29247150	3' (2,389)	7 (2)	A>G	1	0.73	0.05	0.0324809	0.9942	0.9324
DUSP4	rs6993871	8	29247623	3' (1,916)	3 (5)	C>G	1	0.73	0.05	0.0490197	0.988	0.9067
DUSP4	rs41276299	8	29249935	3' UTR	20 (1)	A>G	1	0.72	0.04	NA	NA	NA
DUSP4	rs11997840	8	29252591	intron	14 (1)	n.a.		Poor clustering		NA	NA	NA
DUSP4	rs6995828	8	29253140	intron	6 (2)	C>A	1	0.51	0.05	NA	NA	NA
DUSP4	rs12540995	8	29253448	intron	11 (1)	G>A	1	0.6	0.27	0.249478	0.9985	0.9965
DUSP4	rs583034	8	29253591	synonymous	8 (1)	A>G	0.996	0.84	0.44	NA	NA	NA
DUSP4	rs2341674	8	29254175	intron	13 (1)	G>A	1	0.65	0.16	0.170546	0.9963	0.9877
DUSP4	rs3757996	8	29255203	intron	12 (1)	G>A	1	0.63	0.24	NA	NA	NA
DUSP4	rs12679247	8	29257004	intron	2 (9)	A>G	1	0.29	0.26	NA	NA	NA
DUSP4	rs114280282	8	29259375	intron	16 (1)	n.a.		Poor clustering		NA	NA	NA
DUSP4	rs56072416	8	29261392	intron	1 (10)	G>A	1	0.19	0.14	NA	NA	NA
DUSP4	rs7831728	8	29261722	intron	15 (1)	A>G	1	0.28	0.13	0.130181	0.9963	0.9847
DUSP4	rs1455915	8	29262045	intron	1 (10)	G>A	0.997	0.26	0.13	0.131027	0.9999	0.9997
DUSP4	rs1455916	8	29262198	intron	1 (10)	n.a.		Poor clustering		NA	NA	NA
DUSP4	rs474824	8	29262709	intron	4 (2)	A>G	0.998	0.7	0.4	0.367019	0.9974	0.9953
DUSP4	rs7823775	8	29264680	5' (576)	1 (10)	C>A	0.997	0.12	0.14	0.131141	0.9982	0.9923
EGR2	rs9990	10	64237944	3' (3,819)	5 (2)	G>A	1	0.07	0.13	0.119222	0.975	0.9244
EGR2	rs10128333	10	64240044	3' (1,719)	7 (1)	G>A	0.999	0.44	0.17	NA	NA	NA
EGR2	rs1509963	10	64240417	3' (1,346)	8 (1)	G>A	1	0.27	0.06	0.0496494	0.9824	0.8784
EGR2	rs61865882	10	64242099	3' UTR	3 (3)	A>G	0.999	0.44	0.07	NA	NA	NA
EGR2	rs61865883	10	64242686	3' UTR	3 (3)	A>T	1	0.77	0.07	NA	NA	NA
EGR2	rs10995315	10	64244577	intron	1 (4)	G>A	1	0.72	0.07	NA	NA	NA
EGR2	rs7076924	10	64248994	5' (2,861)	2 (3)	n.a.		Poor clustering		NA	NA	NA
EGR2	rs1888967	10	64249466	5' (3,333)	6 (1)	A>T	1	0.89	0.44	NA	NA	NA
EGR2	rs224277	10	64250067	5' (3,934)	4 (2)	A>G	1	0.48	0.42	0.405013	0.9909	0.9829
GPR83	rs11020758	11	93749932	3' (199)	8 (3)	n.a.		Poor clustering		NA	NA	NA
GPR83	rs1097	11	93750322	3' UTR	13 (1)	C>G	1	0.37	0.31	0.320767	0.9928	0.9853
GPR83	rs12417810	11	93750818	3' UTR	4 (5)	A>C	1	0.56	0.09	0.0883328	0.9987	0.9934
GPR83	rs7933565	11	93751456	3' UTR	5 (4)	A>G	1	0.04	0.4	NA	NA	NA
GPR83	rs16920237	11	93752453	3' UTR	1 (7)	A>G	1	0.41	0.07	NA	NA	NA
GPR83	rs3740864	11	93752531	3' UTR	4 (5)	G>A	1	0.56	0.09	0.0882958	0.9993	0.9974
GPR83	rs78035409	11	93752602	3' UTR	23 (1)	G>A	1	0.85	0.15	NA	NA	NA
GPR83	rs3740866	11	93752719	3' UTR	4 (5)	G>A	1	0.53	0.09	0.0882683	0.9983	0.9907
GPR83	rs3740868	11	93753114	coding	27 (1)	C>A	1	0.18	0.09	0.0992134	0.9967	0.9833
GPR83	rs61905728	11	93754368	intron	25 (1)	n.a.		Poor clustering		NA	NA	NA
GPR83	rs4753604	11	93756046	intron	16 (1)	A>C	0.997	0.13	0.32	NA	NA	NA
GPR83	rs12224966	11	93768425	intron	6 (3)	A>G	0.992	0.9	0.33	0.333485	0.9743	0.9537
GPR83	rs59678918	11	93768603	intron	15 (1)	n.a.		HWE pval < .0001		NA	NA	NA
GPR83	rs6483341	11	93769990	intron	10 (1)	A>G	1	0.35	0.44	0.448944	0.9842	0.9735
GPR83	rs12796488	11	93771205	intron	22 (1)	C>A	0.999	0.16	0.19	0.175561	0.9919	0.9791
GPR83	rs3758785	11	93771787	intron	12 (1)	A>G	1	0.001	0.27	0.282514	0.9867	0.9724
GPR83	rs3758786	11	93771932	intron	7 (3)	G>A	1	0.0002	0.2	0.21712	0.9888	0.9721
GPR83	rs675478	11	93772695	intron	14 (1)	G>A	1	0.75	0.37	0.372444	0.9825	0.9682
GPR83	rs12791316	11	93774161	5' (95)	9 (2)	C>G	0.994	0.35	0.45	NA	NA	NA
GPR83	rs11020767	11	93774451	5' (385)	17 (1)	G>C	1	0.82	0.27	NA	NA	NA
GPR83	rs546439	11	93775003	5' (937)	2 (6)	G>A	1	0.07	0.36	0.334978	0.9874	0.9755
GPR83	rs547289	11	93775074	5' (1,008)	19 (1)	G>A	0.999	0.53	0.25	NA	NA	NA
GPR83	rs10831223	11	93775626	5' (1,560)	3 (6)	G>C	0.999	0.26	0.1	NA	NA	NA
GPR83	rs12790875	11	93777654	5' (3,588)	11 (1)	A>C	0.9839	0.37	0.27	NA	NA	NA
IDO1	rs11998569	8	39886050	5' (4,435)	11 (1)	A>G	0.997	0.87	0.2	NA	NA	NA
IDO1	rs2111742	8	39886574	5' (3,911)	4 (2)	A>G	0.999	0.99	0.45	NA	NA	NA
IDO1	rs3808606	8	39888532	5' (1,953)	3 (2)	G>A	1	0.31	0.48	0.464242	0.9989	0.998
IDO1	rs10089084	8	39889106	5' (1,379)	5 (2)	C>G	1	0.73	0.35	0.350034	0.9641	0.9356
IDO1	rs28602910	8	39889240	5' (1,245)	13 (1)	n.a.		Poor clustering		NA	NA	NA
IDO1	rs4613984	8	39895699	intron	18 (1)	G>A	1	0.73	0.05	0.0298106	0.975	0.6078
IDO1	rs10108662	8	39899146	intron	6 (2)	C>A	1	0.78	0.34	0.340536	0.997	0.9937
IDO1	rs77622610	8	39899388	intron	17 (1)	G>A	1	0.53	0.06	NA	NA	NA
IDO1	rs7010461	8	39900601	intron	9 (1)	G>A	0.997	0.81	0.34	0.337052	0.9737	0.9468
IDO1	rs62512634	8	39902972	intron	8 (2)	G>C	0.999	0.73	0.1	NA	NA	NA
IDO1	rs3739319	8	39904478	intron	1 (3)	G>A	0.998	0.84	0.4	0.404826	0.8392	0.7218
IDO1	rs13270068	8	39907172	3' (2,065)	2 (3)	A>G	0.999	0.95	0.46	NA	NA	NA
IDO1	rs79753191	8	39907970	3' (2,863)	15 (1)	n.a.		Poor clustering		NA	NA	NA
IDO1	rs6991530	8	39909757	3' (4,650)	7 (2)	A>C	1	0.94	0.13	0.126289	0.9669	0.8659
IKZF2	rs17355424	2	213568404	3' (4,249)	19 (2)	G>A	1	0.38	0.23	0.252392	0.9778	0.9508
IKZF2	rs16849550	2	213568803	3' (3,850)	13 (6)	A>G	1	0.04	0.39	0.402466	0.9843	0.9752
IKZF2	rs16849556	2	213569849	3' (2,804)	64 (1)	A>G	1	0.28	0.07	0.0985343	0.9001	0.5562
IKZF2	rs113430599	2	213570764	3' (1,889)	43 (1)	A>G	1	0.58	0.18	NA	NA	NA
IKZF2	rs13000467	2	213571167	3' (1,486)	58 (1)	T>A	1	0.1	0.16	0.150385	0.9887	0.966
IKZF2	rs12996008	2	213574598	3' UTR	27 (1)	n.a.		Poor clustering		NA	NA	NA
IKZF2	rs7593379	2	213579139	3' UTR	8 (13)	A>G	1	0.15	0.4	NA	NA	NA
IKZF2	rs3768792	2	213579954	3' UTR	14 (5)	A>G	0.997	0.29	0.15	0.13402	0.9993	0.9976
IKZF2	rs11676331	2	213583371	intron	34 (1)	G>A	1	0.13	0.41	0.402095	0.9872	0.9798
IKZF2	rs1871946	2	213587652	intron	28 (1)	A>G	1	0.61	0.41	0.416089	0.9994	0.999
IKZF2	rs4673715	2	213592206	intron	57 (1)	G>A	0.999	0.4	0.16	NA	NA	NA
IKZF2	rs12694291	2	213592697	intron	55 (1)	G>A	0.992	0.38	0.16	NA	NA	NA
IKZF2	rs2291241	2	213594699	intron	53 (1)	A>T	1	0.37	0.15	0.135379	0.9874	0.9626
IKZF2	rs78671234	2	213595476	intron	66 (1)	n.a.		Poor clustering		NA	NA	NA
IKZF2	rs10178238	2	213601135	intron	36 (1)	C>A	1	0.14	0.42	0.420173	0.999	0.9981
IKZF2	rs1119376	2	213607599	intron	2 (25)	A>G	0.995	0.3	0.37	0.367298	0.9757	0.9604
IKZF2	rs10932460	2	213608717	intron	17 (3)	T>A	0.999	0.29	0.47	0.432969	0.9491	0.9182
IKZF2	rs2128391	2	213609981	intron	2 (25)	A>G	1	0.32	0.36	0.367347	0.9779	0.9637
IKZF2	rs2086643	2	213610787	intron	65 (1)	G>A	1	0.53	0.09	NA	NA	NA
IKZF2	rs114201829	2	213611553	intron	60 (1)	C>A	0.998	0.78	0.19	NA	NA	NA
IKZF2	rs1564612	2	213612567	intron	5 (19)	A>T	0.999	0.37	0.43	0.420716	0.9211	0.8754
IKZF2	rs1482579	2	213619287	intron	5 (19)	A>G	0.999	0.37	0.42	0.415081	0.9227	0.8801
IKZF2	rs77987716	2	213628476	intron	56 (1)	A>G	0.999	0.33	0.07	NA	NA	NA
IKZF2	rs11885466	2	213632160	intron	12 (7)	G>A	1	0.44	0.08	0.0789886	0.9906	0.9554
IKZF2	rs6737449	2	213632251	intron	1 (44)	C>G	1	0.99	0.27	0.286144	0.9911	0.9842
IKZF2	rs13008255	2	213637469	intron	61 (1)	A>G	1	0.92	0.07	0.0699738	0.9873	0.9145
IKZF2	rs10186029	2	213637531	intron	30 (1)	G>A	0.998	0.34	0.43	0.436623	0.9817	0.9687
IKZF2	rs62187833	2	213637708	intron	41 (1)	A>G	0.999	0.71	0.1	NA	NA	NA
IKZF2	rs9288465	2	213638861	intron	3 (23)	A>G	1	0.19	0.42	0.442238	0.9181	0.8731
IKZF2	rs1025820	2	213642023	intron	4 (20)	A>C	1	0.37	0.43	0.456629	0.9139	0.868
IKZF2	rs1026886	2	213642958	intron	21 (2)	A>G	0.999	0.47	0.12	NA	NA	NA
IKZF2	rs79957297	2	213645265	intron	62 (1)	n.a.		Poor clustering		NA	NA	NA
IKZF2	rs13007271	2	213646012	intron	4 (20)	C>G	1	0.3	0.45	0.472668	0.9543	0.93
IKZF2	rs11689895	2	213646798	intron	18 (2)	C>A	0.999	0.43	0.47	NA	NA	NA
IKZF2	rs1530239	2	213651879	intron	22 (2)	G>A	1	0.82	0.1	0.0841544	0.9993	0.9966
IKZF2	rs115486939	2	213652538	intron	49 (1)	n.a.		Poor clustering		NA	NA	NA
IKZF2	rs76611777	2	213653428	intron	70 (1)	C>A	0.999	0.47	0.06	NA	NA	NA
IKZF2	rs7582752	2	213662648	intron	38 (1)	A>G	1	0.97	0.27	0.309376	0.9208	0.8576
IKZF2	rs1530237	2	213665967	intron	7 (15)	A>G	1	0.78	0.13	NA	NA	NA
IKZF2	rs79726235	2	213672457	intron	20 (2)	G>A	1	1	0.05	NA	NA	NA
IKZF2	rs114117602	2	213674521	intron	54 (1)	A>C	0.999	0.6	0.19	NA	NA	NA
IKZF2	rs10932463	2	213676559	intron	44 (1)	n.a.		HWE pval < .0001		NA	NA	NA
IKZF2	rs78559085	2	213677246	intron	52 (1)	n.a.		Poor clustering		NA	NA	NA
IKZF2	rs10497992	2	213678527	intron	47 (1)	A>G	1	0.9	0.15	0.145112	0.9962	0.9874
IKZF2	rs10207421	2	213684672	intron	33 (1)	G>A	0.999	0.57	0.38	0.379237	0.9946	0.9908
IKZF2	rs77472772	2	213685963	intron	71 (1)	A>C	1	0.22	0.1	NA	NA	NA
IKZF2	rs12616255	2	213687140	intron	31 (1)	n.a.		Poor clustering		NA	NA	NA
IKZF2	rs6435757	2	213688698	intron	6 (19)	A>G	1	0.41	0.36	0.367666	0.9993	0.9986
IKZF2	rs920525	2	213694940	intron	51 (1)	A>G	0.998	0.26	0.1	0.102487	0.999	0.9946
IKZF2	rs12694296	2	213699622	intron	26 (1)	G>A	0.998	0.14	0.46	NA	NA	NA
IKZF2	rs920524	2	213700029	intron	6 (19)	G>C	1	0.31	0.35	0.370715	0.9813	0.9664
IKZF2	rs10497996	2	213706110	intron	25 (1)	n.a.		Poor clustering		NA	NA	NA
IKZF2	rs72949917	2	213711410	intron	69 (1)	G>A	1	0.21	0.04	NA	NA	NA
IKZF2	rs12052695	2	213711804	intron	9 (9)	A>C	1	0.19	0.46	0.471152	0.9959	0.9934
IKZF2	rs16849846	2	213714684	intron	40 (1)	n.a.		Poor clustering		NA	NA	NA
IKZF2	rs6747303	2	213717718	intron	11 (7)	T>A	0.999	1	0.05	0.0546735	0.9833	0.8743
IKZF2	rs1372133	2	213723727	intron	15 (4)	A>G	0.999	0.95	0.07	NA	NA	NA
IKZF2	rs1372134	2	213723833	intron	15 (4)	G>A	1	0.81	0.07	NA	NA	NA
IKZF2	rs3768788	2	213723990	intron	10 (7)	A>G	1	0.92	0.41	0.391826	0.9988	0.9977
IKZF2	rs80317363	2	213725157	5' (579)	63 (1)	A>C	0.999	0.67	0.06	NA	NA	NA
IKZF2	rs10209675	2	213725362	5' (784)	10 (7)	A>G	1	0.87	0.41	NA	NA	NA
IKZF2	rs7583371	2	213726569	5' (1,991)	37 (1)	G>A	0.999	0.89	0.24	NA	NA	NA
IKZF2	rs1922790	2	213726708	5' (2,130)	16 (4)	C>A	1	0.87	0.16	0.132632	0.999	0.9964
IKZF4	rs74553409	12	54696475	5' (4,481)	5 (1)	n.a.		Poor clustering		NA	NA	NA
IKZF4	rs115639688	12	54702848	intron	4 (1)	n.a.		Poor clustering		NA	NA	NA
IKZF4	rs2456973	12	54703195	intron	2 (4)	A>C	1	0.63	0.32	0.338945	0.9956	0.9907
IKZF4	rs77508451	12	54714511	intron	7 (1)	G>A	1	0.92	0.07	NA	NA	NA
IKZF4	rs35485002	12	54715842	3' UTR	1 (7)	A>G	1	0.05	0.09	NA	NA	NA
IKZF4	rs78865465	12	54720413	3' (1,927)	6 (1)	G>A	1	0.92	0.07	NA	NA	NA
IKZF4	rs1131017	12	54722196	3' (3,710)	3 (1)	C>G	0.994	0	0.36	NA	NA	NA
IL10RB	rs6517157	21	33556678	5' (3,864)	34 (1)	n.a.		Poor clustering		NA	NA	NA
IL10RB	rs1131668	21	33556748	5' (3,794)	7 (2)	n.a.		Poor clustering		NA	NA	NA
IL10RB	rs999788	21	33559901	5' (641)	26 (1)	G>A	1	0.53	0.19	0.155446	0.9366	0.82
IL10RB	rs2834167	21	33562658	K47E	20 (1)	A>G	1	0.95	0.25	0.239117	0.996	0.9908
IL10RB	rs2284552	21	33565952	intron	23 (1)	C>A	1	0.31	0.21	0.195105	0.9965	0.9916
IL10RB	rs2843986	21	33569400	intron	14 (1)	n.a.		Poor clustering		NA	NA	NA
IL10RB	rs2849997	21	33570678	intron	3 (7)	G>A	0.999	0.77	0.44	NA	NA	NA
IL10RB	rs8178474	21	33571207	intron	27 (1)	A>G	1	0.32	0.12	NA	NA	NA
IL10RB	rs2834168	21	33572661	intron	19 (1)	A>G	0.999	0.99	0.31	0.302801	0.9962	0.9917
IL10RB	rs2850001	21	33578523	intron	1 (32)	G>A	1	0.82	0.46	0.465294	0.9743	0.9513
IL10RB	rs2247526	21	33579557	intron	1 (32)	A>G	1	0.82	0.46	0.464227	0.9936	0.9885
IL10RB	rs765429	21	33581871	intron	1 (32)	G>A	0.999	0.96	0.47	0.462258	0.956	0.921
IL10RB	rs116867085	21	33582623	intron	36 (1)	C>G	0.999	0.99	0.46	NA	NA	NA
IL10RB	rs8178528	21	33582850	intron	9 (1)	G>A	0.993	0.74	0.46	NA	NA	NA
IL10RB	rs2843697	21	33583652	intron	12 (1)	G>A	0.999	0.88	0.46	NA	NA	NA
IL10RB	rs2248118	21	33584581	intron	13 (1)	G>A	0.997	0.9	0.38	0.381118	0.8953	0.819
IL10RB	rs2843944	21	33585814	intron	17 (1)	G>A	0.999	0.76	0.32	NA	NA	NA
IL10RB	rs735299	21	33586460	intron	4 (3)	A>G	0.999	0.67	0.49	0.492382	0.8806	0.8118
IL10RB	rs999261	21	33588030	intron	2 (20)	A>G	1	0.3	0.2	0.182269	0.9987	0.9963
IL10RB	rs1467845	21	33588246	intron	15 (1)	n.a.		Call Rate < 95%		NA	NA	NA
IL10RB	rs999259	21	33588362	intron	10 (1)	n.a.		Call Rate < 95%		NA	NA	NA
IL10RB	rs8178556	21	33588425	intron	31 (1)	A>C	0.995	0.09	0.07	0.0511874	0.9994	0.9959
IL10RB	rs73191832	21	33588565	intron	24 (1)	n.a.		Poor clustering		NA	NA	NA
IL10RB	rs3171425	21	33590617	3' UTR	5 (2)	G>A	1	0.67	0.41	0.403462	0.9804	0.9614
IL10RB	rs1058867	21	33591251	3' UTR	5 (2)	A>G	0.999	0.71	0.41	0.403077	0.9991	0.9983
IL10RB	rs7281762	21	33591442	3' (52)	2 (20)	G>A	0.999	0.29	0.2	0.187689	0.9939	0.9836
IL10RB	rs2409485	21	33592112	3' (722)	11 (1)	A>C	0.998	0.2	0.49	NA	NA	NA
IL10RB	rs7277902	21	33592443	3' (1,053)	28 (1)	C>A	0.999	0.46	0.12	0.112784	0.9976	0.991
IL10RB	rs2834175	21	33594831	3' (3,441)	16 (1)	G>A	1	0.58	0.26	0.289842	0.9719	0.9388
IL10RB	rs6517159	21	33595270	3' (3,880)	8 (2)	G>C	1	0.29	0.29	NA	NA	NA
IL10RB	rs79732266	21	33595544	3' (4,154)	35 (1)	n.a.		Poor clustering		NA	NA	NA
IL10RB	rs79734182	21	33595843	3' (4,453)	33 (1)	A>G	1	1	0.02	NA	NA	NA
IL10RB	rs78900274	21	33596258	3' (4,868)	37 (1)	A>G	1	1	0.02	NA	NA	NA
IL15RA	rs41294013	10	6031350	3' (2,990)	6 (4)	A>G	1	0.28	0.03	NA	NA	NA
IL15RA	rs17146980	10	6032550	3' (1,790)	14 (2)	G>A	1	0.93	0.15	0.145237	0.9909	0.9718
IL15RA	rs41294029	10	6033467	3' (873)	43 (1)	G>A	0.998	0.77	0.09	NA	NA	NA
IL15RA	rs2296135	10	6034700	3' UTR	3 (4)	C>A	1	0.25	0.48	0.477802	0.9995	0.9993
IL15RA	rs2229135	10	6035058	3' UTR	5 (4)	G>A	1	0.39	0.08	0.0829779	0.9984	0.9918
IL15RA	rs3136630	10	6037826	intron	23 (1)	G>A	0.998	0.36	0.3	0.295037	0.9992	0.9983
IL15RA	rs2296140	10	6038702	intron	37 (1)	G>A	0.998	0.7	0.12	0.121951	0.9706	0.8842
IL15RA	rs3136626	10	6041022	intron	7 (3)	A>G	1	0.02	0.3	0.30515	0.9999	0.9998
IL15RA	rs3136620	10	6041448	intron	4 (4)	G>A	1	0.03	0.2	0.214421	0.9985	0.9962
IL15RA	rs2228059	10	6042374	N149T	9 (2)	A>C	1	0.32	0.49	0.489799	0.9989	0.9985
IL15RA	rs8177701	10	6043318	intron	31 (1)	n.a.		Poor clustering		NA	NA	NA
IL15RA	rs117590560	10	6043392	intron	51 (1)	n.a.		Poor clustering		NA	NA	NA
IL15RA	rs11574674	10	6043457	intron	35 (1)	A>G	1	0.38	0.15	0.160566	0.9885	0.9691
IL15RA	rs8177694	10	6043841	intron	39 (1)	C>A	0.999	0.53	0.18	0.171534	0.9615	0.8947
IL15RA	rs8177692	10	6044018	intron	25 (1)	A>G	1	0.74	0.28	0.279673	0.9996	0.9992
IL15RA	rs3136615	10	6045516	intron	33 (1)	G>C	1	0.77	0.2	0.185816	0.9528	0.88
IL15RA	rs3136614	10	6045680	intron	27 (1)	A>G	1	0.75	0.21	0.221989	0.9993	0.998
IL15RA	rs117110581	10	6047196	intron	50 (1)	n.a.		Poor clustering		NA	NA	NA
IL15RA	rs3181148	10	6048036	intron	36 (1)	G>A	1	0.59	0.09	0.0984212	0.9864	0.9339
IL15RA	rs2296139	10	6048178	synonymous	12 (2)	G>A	1	0.57	0.12	0.129543	0.9986	0.9951
IL15RA	rs8177685	10	6048619	intron	45 (1)	A>G	0.999	0.4	0.11	0.106476	0.9996	0.9984
IL15RA	rs7917197	10	6049032	intron	46 (1)	G>A	1	0.11	0.12	0.118118	0.9998	0.9994
IL15RA	rs4747823	10	6049146	intron	30 (1)	G>A	0.999	1	0.03	NA	NA	NA
IL15RA	rs7097780	10	6050233	intron	2 (5)	A>G	0.999	0.5	0.34	0.334673	0.9996	0.9992
IL15RA	rs8177676	10	6050633	intron	13 (2)	T>A	1	0.55	0.1	0.104459	0.9922	0.9636
IL15RA	rs8177664	10	6053311	intron	48 (1)	A>T	1	0.7	0.07	0.0733428	0.9914	0.9501
IL15RA	rs3736862	10	6054278	intron	11 (2)	G>C	0.995	0.99	0.21	0.200325	0.9723	0.9395
IL15RA	rs8177655	10	6055125	intron	20 (1)	G>A	1	0.4	0.33	0.324392	0.9977	0.9952
IL15RA	rs8177652	10	6055390	intron	10 (2)	G>A	0.996	0.85	0.34	NA	NA	NA
IL15RA	rs7086174	10	6056405	intron	22 (1)	C>A	0.999	0.89	0.34	NA	NA	NA
IL15RA	rs2274035	10	6059186	intron	8 (3)	n.a.		Poor clustering		NA	NA	NA
IL15RA	rs8177628	10	6059704	intron	24 (1)	G>A	0.999	0.83	0.17	NA	NA	NA
IL15RA	rs8177762	10	6060197	5' (49)	49 (1)	G>A	0.998	0.05	0.07	0.061217	0.9967	0.9769
IL15RA	rs3136611	10	6061553	5' (1,405)	1 (7)	A>G	0.999	0.94	0.43	NA	NA	NA
IL15RA	rs7913599	10	6062568	5' (2,420)	16 (1)	G>A	1	0.74	0.35	0.340129	0.9999	0.9998
IL15RA	rs115607475	10	6064168	5' (4,020)	42 (1)	n.a.		Poor clustering		NA	NA	NA
IL15RA	rs4747826	10	6064319	5' (4,171)	34 (1)	G>A	1	0.77	0.15	NA	NA	NA
IL2RB	rs2543538	22	35846931	3' (4,893)	36 (1)	n.a.		Poor clustering		NA	NA	NA
IL2RB	rs16997734	22	35848578	3' (3,246)	33 (1)	A>G	1	0.51	0.14	NA	NA	NA
IL2RB	rs5995384	22	35849613	3' (2,211)	15 (1)	G>A	1	0.69	0.35	NA	NA	NA
IL2RB	rs5750383	22	35850171	3' (1,653)	6 (3)	G>A	1	0.9	0.5	NA	NA	NA
IL2RB	rs3218340	22	35850841	3' (983)	17 (1)	G>C	1	0.23	0.47	NA	NA	NA
IL2RB	rs228937	22	35850917	3' (907)	26 (1)	A>C	0.999	0.71	0.2	0.245732	0.7963	0.5719
IL2RB	rs3218339	22	35851157	3' (667)	35 (1)	G>A	1	0.24	0.12	0.127961	0.9955	0.9862
IL2RB	rs228941	22	35853667	3' UTR	3 (5)	n.a.		Call Rate < 95%		NA	NA	NA
IL2RB	rs228942	22	35854565	D391E	12 (2)	C>A	1	0.38	0.18	0.185973	0.9988	0.9968
IL2RB	rs62230829	22	35855879	intron	41 (1)	A>G	0.999	0.21	0.03	NA	NA	NA
IL2RB	rs228946	22	35856305	intron	14 (1)	G>A	0.9899	0.49	0.35	NA	NA	NA
IL2RB	rs228947	22	35856475	intron	27 (1)	G>A	0.9748	0.04	0.25	0.235289	0.9922	0.9847
IL2RB	rs2072861	22	35858308	intron	5 (4)	A>C	0.999	0.26	0.29	0.325396	0.9996	0.9993
IL2RB	rs3218315	22	35859670	intron	10 (2)	G>A	0.998	0.46	0.35	0.3707	0.9943	0.99
IL2RB	rs3218313	22	35860029	intron	31 (1)	G>A	1	0.75	0.25	NA	NA	NA
IL2RB	rs3218312	22	35860278	intron	20 (1)	n.a.		Poor clustering		NA	NA	NA
IL2RB	rs2543537	22	35861063	intron	16 (1)	G>A	0.9879	0.08	0.44	NA	NA	NA
IL2RB	rs228953	22	35861382	synonymous	1 (7)	G>A	1	0.19	0.43	0.434943	0.9535	0.9292
IL2RB	rs3218299	22	35862153	intron	38 (1)	G>A	1	0.58	0.07	NA	NA	NA
IL2RB	rs3218295	22	35863014	intron	2 (6)	G>A	1	0.96	0.13	0.150676	0.9994	0.9983
IL2RB	rs3218292	22	35863476	intron	29 (1)	G>C	1	0.58	0.18	0.169503	0.8069	0.4934
IL2RB	rs3218288	22	35864922	intron	40 (1)	G>A	1	0.57	0.08	NA	NA	NA
IL2RB	rs2281094	22	35865417	intron	8 (3)	G>A	1	0.33	0.3	0.288001	0.9987	0.9977
IL2RB	rs228963	22	35865894	intron	7 (3)	A>G	1	0.13	0.44	0.434863	0.9462	0.9119
IL2RB	rs3218284	22	35867009	intron	42 (1)	G>A	1	0.27	0.05	NA	NA	NA
IL2RB	rs228968	22	35868274	intron	34 (1)	A>G	1	0.65	0.13	0.14643	0.9525	0.8457
IL2RB	rs1003694	22	35869074	intron	24 (1)	G>A	0.999	0.22	0.29	0.281778	0.9959	0.9918
IL2RB	rs1003692	22	35869143	intron	28 (1)	G>C	0.996	0.48	0.21	NA	NA	NA
IL2RB	rs2235330	22	35869659	intron	32 (1)	A>G	1	0.22	0.2	0.199788	0.998	0.9946
IL2RB	rs3218266	22	35871777	intron	25 (1)	G>C	0.999	0.42	0.33	0.312448	0.9489	0.9136
IL2RB	rs3218264	22	35871944	intron	11 (2)	G>A	1	0.3	0.33	0.318313	0.9548	0.9229
IL2RB	rs228975	22	35872147	intron	21 (1)	G>A	1	0.3	0.37	0.370336	0.9932	0.9877
IL2RB	rs2284034	22	35872708	intron	23 (1)	G>A	1	0.34	0.33	0.322556	0.9393	0.8862
IL2RB	rs3218261	22	35873102	intron	43 (1)	n.a.		HWE pval < .0001		NA	NA	NA
IL2RB	rs2284035	22	35874548	intron	9 (2)	G>A	0.999	0.42	0.47	NA	NA	NA
IL2RB	rs3218253	22	35874756	intron	4 (5)	G>A	1	0.63	0.26	0.266836	0.9846	0.9692
IL2RB	rs228979	22	35874877	intron	18 (1)	C>A	0.999	0.47	0.27	0.281216	0.9962	0.9919
IL6ST	rs115524105	5	55267951	3' (4,500)	19 (1)	n.a.		Poor clustering		NA	NA	NA
IL6ST	rs111512088	5	55268426	3' (4,025)	10 (1)	n.a.		Poor clustering		NA	NA	NA
IL6ST	rs72763900	5	55275356	intron	9 (1)	A>G	0.9799	0.91	0.28	NA	NA	NA
IL6ST	rs11574780	5	55279795	intron	18 (1)	A>G	1	0.7	0.04	0.0450139	0.9992	0.9915
IL6ST	rs7719246	5	55280534	intron	2 (13)	A>T	0.999	0.84	0.15	0.13812	0.9654	0.8817
IL6ST	rs2228043	5	55287688	L397V	1 (24)	C>G	1	0.58	0.13	0.126004	0.9741	0.8997
IL6ST	rs78247297	5	55288741	intron	12 (1)	n.a.		Poor clustering		NA	NA	NA
IL6ST	rs1373998	5	55291322	intron	2 (13)	G>A	1	0.71	0.15	0.139374	0.9776	0.9194
IL6ST	rs114884106	5	55293359	intron	16 (1)	n.a.		Poor clustering		NA	NA	NA
IL6ST	rs11745285	5	55299098	intron	13 (1)	C>A	1	0.34	0.13	NA	NA	NA
IL6ST	rs2228044	5	55299910	G148R	1 (24)	n.a.		Poor clustering		NA	NA	NA
IL6ST	rs10055770	5	55302479	intron	7 (1)	n.a.		Poor clustering		NA	NA	NA
IL6ST	rs10471420	5	55308353	intron	8 (1)	A>G	1	0.11	0.27	NA	NA	NA
IL6ST	rs2112979	5	55327793	5' (1,273)	3 (5)	n.a.		Poor clustering		NA	NA	NA
IL6ST	rs6870870	5	55330085	5' (3,565)	4 (2)	C>A	0.995	0.83	0.43	0.423443	0.9999	0.9997
IL9	rs9327734	5	135251612	3' (4,222)	8 (1)	C>A	1	0.84	0.17	NA	NA	NA
IL9	rs58183315	5	135252664	3' (3,170)	2 (4)	n.a.		Poor clustering		NA	NA	NA
IL9	rs2069885	5	135256064	T117M	4 (3)	G>A	1	0.33	0.14	0.131739	0.9999	0.9995
IL9	rs2069882	5	135257532	intron	7 (1)	A>G	1	0.83	0.21	0.201108	0.9976	0.995
IL9	rs31564	5	135258152	intron	6 (1)	A>C	1	0.74	0.36	0.366456	0.9974	0.995
IL9	rs1799962	5	135259755	5' (340)	11 (1)	A>G	1	0.63	0.07	NA	NA	NA
IL9	rs2069870	5	135260560	5' (1,145)	1 (4)	A>G	0.999	0.5	0.19	0.19195	0.9958	0.9883
IL9	rs79388951	5	135260646	5' (1,231)	3 (4)	G>A	1	0.62	0.03	NA	NA	NA
IL9	rs74476359	5	135261049	5' (1,634)	12 (1)	G>C	1	0.62	0.03	NA	NA	NA
IL9	rs77552972	5	135263267	5' (3,852)	13 (1)	A>G	1	1	0.04	NA	NA	NA
IL9	rs31563	5	135263505	5' (4,090)	9 (1)	G>A	1	0.56	0.14	0.134795	0.9961	0.9863
IL9	rs17169344	5	135263914	5' (4,499)	5 (2)	A>G	0.999	0.95	0.11	0.113547	0.9984	0.9926
INHBA	rs6967889	7	41690416	3' (4,710)	4 (1)	G>A	0.993	0.97	0.32	NA	NA	NA
INHBA	rs2237436	7	41697456	intron	6 (1)	C>G	1	0.66	0.36	0.377293	0.9102	0.8448
INHBA	rs2237435	7	41697578	intron	3 (2)	C>A	1	0.79	0.28	0.26233	0.9599	0.9095
INHBA	rs11770488	7	41699379	intron	10 (1)	A>T	0.999	0.45	0.17	0.185145	0.8539	0.6082
INHBA	rs75407316	7	41702171	intron	11 (1)	G>A	1	1	0.24	NA	NA	NA
INHBA	rs3801158	7	41705666	intron	8 (1)	C>G	1	0.44	0.19	0.1674	0.9394	0.8423
INHBA	rs73100934	7	41709183	5' UTR	1 (4)	A>G	1	0.56	0.08	NA	NA	NA
INHBA	rs2877098	7	41709819	5' (588)	7 (1)	G>A	1	0.82	0.32	0.324901	0.9984	0.9965
INHBA	rs2007475	7	41713082	5' (3,851)	2 (3)	G>A	1	0.61	0.46	0.441243	0.8787	0.7944
INHBB	rs35704069	2	120815818	5' (4,371)	4 (1)	A>G	0.9889	0.41	0.27	NA	NA	NA
INHBB	rs72827460	2	120816345	5' (3,844)	12 (1)	A>G	0.999	0.12	0.13	NA	NA	NA
INHBB	rs10204633	2	120816639	5' (3,550)	10 (1)	A>G	1	0.63	0.07	NA	NA	NA
INHBB	rs61546266	2	120819004	5' (1,185)	14 (1)	n.a.		Call Rate < 95%		NA	NA	NA
INHBB	rs11902591	2	120822473	intron	15 (1)	A>G	0.999	0.24	0.06	0.0695163	0.9355	0.6158
INHBB	rs116459044	2	120822725	intron	13 (1)	n.a.		Poor clustering		NA	NA	NA
INHBB	rs7581178	2	120826857	3' (1,004)	1 (2)	C>G	1	0.17	0.05	0.0652535	0.9325	0.5007
INHBB	rs60130558	2	120827029	3' (1,176)	7 (1)	n.a.		Poor clustering		NA	NA	NA
INHBB	rs4848587	2	120827730	3' (1,877)	6 (1)	G>A	1	0.02	0.15	NA	NA	NA
INHBB	rs11888504	2	120828905	3' (3,052)	8 (1)	C>A	0.997	1	0.01	NA	NA	NA
INHBB	rs745723	2	120829226	3' (3,373)	11 (1)	G>C	1	0.04	0.08	0.0837164	0.9393	0.7113
INHBB	rs10175965	2	120829351	3' (3,498)	9 (1)	G>A	1	0.77	0.09	NA	NA	NA
INHBB	rs28626798	2	120829876	3' (4,023)	5 (1)	A>G	1	0.15	0.15	NA	NA	NA
INHBB	rs7576183	2	120830733	3' (4,880)	2 (1)	G>A	1	0.31	0.41	0.390744	0.9953	0.9911
INHBB	rs6542588	2	120830848	3' (4,995)	3 (1)	A>C	0.9738	0.03	0.32	NA	NA	NA
IRF4	rs116709199	6	337687	intron	25 (1)	n.a.		Poor clustering		NA	NA	NA
IRF4	rs12203592	6	341321	intron	16 (1)	G>A	1	0.13	0.14	0.181144	0.9861	0.9611
IRF4	rs6900384	6	342937	intron	1 (21)	A>C	0.999	0.79	0.07	0.0965764	0.9557	0.8328
IRF4	rs2666970	6	343242	intron	1 (21)	G>A	1	0.12	0.11	0.0995745	0.9644	0.8618
IRF4	rs6918132	6	343701	intron	22 (1)	C>G	1	1	0.03	NA	NA	NA
IRF4	rs2292383	6	347087	intron	8 (3)	n.a.		HWE pval < .0001		NA	NA	NA
IRF4	rs66922646	6	347159	intron	21 (1)	G>A	1	1	0.04	NA	NA	NA
IRF4	rs62389397	6	348737	intron	26 (1)	A>C	1	1	0.03	NA	NA	NA
IRF4	rs3778607	6	348799	intron	11 (1)	G>A	0.999	0.04	0.49	0.47255	0.9877	0.9791
IRF4	rs2001508	6	349632	intron	3 (5)	A>C	0.999	0.49	0.15	0.156424	0.96	0.8747
IRF4	rs17825664	6	350873	intron	6 (4)	A>G	1	0.86	0.05	0.0571692	0.9981	0.9849
IRF4	rs1131442	6	352656	3' UTR	13 (1)	n.a.		Poor clustering		NA	NA	NA
IRF4	rs4959248	6	352882	3' UTR	23 (1)	G>A	1	1	0	NA	NA	NA
IRF4	rs1050975	6	353012	3' UTR	5 (4)	A>G	1	0.2	0.09	0.0851979	0.9998	0.9989
IRF4	rs1050976	6	353079	3' UTR	4 (4)	G>A	1	0.06	0.49	0.489539	0.9565	0.9343
IRF4	rs7768807	6	353246	3' UTR	15 (1)	A>G	1	0.85	0.25	0.233738	0.9734	0.9518
IRF4	rs12211228	6	353833	3' UTR	9 (2)	G>C	1	0.4	0.15	0.158926	0.9663	0.898
IRF4	rs9391997	6	354119	3' UTR	4 (4)	A>G	1	0.04	0.49	0.492698	0.9731	0.955
IRF4	rs1050979	6	355417	3' UTR	4 (4)	A>G	1	0.04	0.49	NA	NA	NA
IRF4	rs1877175	6	355493	3' UTR	2 (7)	G>A	0.999	0.44	0.2	0.211468	0.981	0.9513
IRF4	rs9392502	6	355608	3' UTR	7 (3)	C>G	0.997	0.72	0.2	0.183602	0.9858	0.9629
IRF4	rs2316515	6	355848	3' UTR	12 (1)	G>A	0.999	0.05	0.41	NA	NA	NA
IRF4	rs872071	6	356064	3' UTR	4 (4)	A>G	0.994	0.03	0.49	0.493436	0.999	0.9983
IRF4	rs7757906	6	357741	3' (1548)	14 (1)	G>A	0.998	0.37	0.27	0.271424	0.9998	0.9996
IRF4	rs9392504	6	357802	3' (1,609)	10 (1)	A>G	1	0.01	0.49	NA	NA	NA
IRF4	rs6927233	6	358666	3' (2,473)	19 (1)	A>G	1	0.08	0.13	NA	NA	NA
ITGAE	rs56327477	17	3560958	3' (3,710)	64 (1)	n.a.		Poor clustering		NA	NA	NA
ITGAE	rs35750614	17	3561034	3' (3,634)	100 (1)	C>G	1	0.23	0.07	NA	NA	NA
ITGAE	rs76082813	17	3561988	3' (2,680)	94 (1)	n.a.		Poor clustering		NA	NA	NA
ITGAE	rs1367950	17	3565047	intron	1 (26)	G>A	1	0.26	0.49	0.488587	0.9951	0.9934
ITGAE	rs2737126	17	3565564	intron	43 (1)	n.a.		Call Rate < 95%		NA	NA	NA
ITGAE	rs117731760	17	3566213	intron	75 (1)	n.a.		Poor clustering		NA	NA	NA
ITGAE	rs2293881	17	3566887	intron	42 (1)	G>A	1	0.74	0.39	NA	NA	NA
ITGAE	rs1431977	17	3567466	intron	1 (26)	C>A	1	0.1	0.5	0.476033	0.9554	0.9292
ITGAE	rs2875740	17	3568180	intron	47 (1)	G>A	0.999	0.62	0.39	NA	NA	NA
ITGAE	rs1977020	17	3569257	intron	29 (1)	G>A	0.996	0.09	0.47	NA	NA	NA
ITGAE	rs75053862	17	3573230	intron	71 (1)	T>A	1	0.92	0.11	NA	NA	NA
ITGAE	rs16953429	17	3573565	intron	13 (3)	n.a.		Poor clustering		NA	NA	NA
ITGAE	rs170208	17	3576447	intron	12 (3)	G>A	1	0.1	0.47	0.453816	0.9866	0.9772
ITGAE	rs71366571	17	3577299	intron	89 (1)	G>A	1	0.72	0.06	NA	NA	NA
ITGAE	rs2976230	17	3577990	coding	21 (2)	A>G	0.994	0.36	0.22	0.214522	0.9993	0.9981
ITGAE	rs7219600	17	3578222	intron	5 (4)	C>G	1	0.33	0.33	0.313441	0.9786	0.9576
ITGAE	rs2915555	17	3579341	intron	57 (1)	G>A	1	0.95	0.32	0.337441	0.9892	0.9837
ITGAE	rs1716	17	3579585	coding	6 (4)	G>A	0.998	0.72	0.34	0.338975	0.9928	0.9886
ITGAE	rs2976234	17	3580845	intron	19 (2)	A>G	1	0.56	0.32	0.30631	0.9556	0.9246
ITGAE	rs57784565	17	3582238	intron	104 (1)	G>A	1	0.53	0.07	NA	NA	NA
ITGAE	rs56163349	17	3582352	intron	86 (1)	A>G	0.999	0.1	0.07	NA	NA	NA
ITGAE	rs3744678	17	3582517	intron	66 (1)	A>C	1	0.89	0.22	0.214553	0.9919	0.9796
ITGAE	rs62072595	17	3583381	intron	101 (1)	G>A	0.999	0.09	0.08	NA	NA	NA
ITGAE	rs220468	17	3584083	intron	48 (1)	A>G	0.999	0.38	0.29	0.308876	0.9263	0.8683
ITGAE	rs178323	17	3584702	intron	4 (4)	A>G	1	0.18	0.48	0.495254	0.9939	0.9892
ITGAE	rs12946675	17	3587056	intron	16 (2)	G>C	0.998	0.08	0.45	0.383203	0.848	0.7367
ITGAE	rs7359554	17	3589111	intron	41 (1)	G>A	1	1	0.35	NA	NA	NA
ITGAE	rs170211	17	3589186	intron	36 (1)	T>A	1	0.15	0.46	0.468472	0.8524	0.7649
ITGAE	rs2325724	17	3590416	intron	31 (1)	n.a.		Poor clustering		NA	NA	NA
ITGAE	rs71366572	17	3590974	intron	88 (1)	G>A	0.994	0.003	0.09	NA	NA	NA
ITGAE	rs2915548	17	3592245	intron	49 (1)	A>G	1	0.21	0.39	NA	NA	NA
ITGAE	rs34715307	17	3595281	intron	22 (2)	A>C	1	0.03	0.12	NA	NA	NA
ITGAE	rs1183610	17	3595963	coding	65 (1)	A>G	1	0.54	0.21	0.195921	0.9985	0.996
ITGAE	rs1178562	17	3596321	intron	63 (1)	C>A	1	0.03	0.19	NA	NA	NA
ITGAE	rs12952331	17	3599305	intron	78 (1)	A>G	1	0.1	0.11	NA	NA	NA
ITGAE	rs66703183	17	3600280	intron	14 (3)	A>G	0.9879	0.21	0.09	NA	NA	NA
ITGAE	rs220482	17	3601494	intron	53 (1)	A>G	1	0.87	0.29	NA	NA	NA
ITGAE	rs11652878	17	3601729	coding	9 (4)	A>G	0.999	0.34	0.1	0.105865	0.9648	0.8595
ITGAE	rs220479	17	3603924	coding	8 (4)	n.a.		Call Rate < 95%		NA	NA	NA
ITGAE	rs62070383	17	3604770	intron	38 (1)	A>G	0.9899	0.35	0.42	NA	NA	NA
ITGAE	rs170213	17	3607613	intron	3 (8)	A>G	1	0.8	0.3	0.277593	0.9993	0.9985
ITGAE	rs118026276	17	3609191	intron	95 (1)	n.a.		Poor clustering		NA	NA	NA
ITGAE	rs8080482	17	3611865	intron	39 (1)	G>A	0.995	0.27	0.4	NA	NA	NA
ITGAE	rs118083259	17	3612596	intron	25 (2)	n.a.		Poor clustering		NA	NA	NA
ITGAE	rs71366575	17	3614542	intron	80 (1)	n.a.		Poor clustering		NA	NA	NA
ITGAE	rs35020724	17	3615949	intron	23 (2)	G>A	1	0.07	0.1	NA	NA	NA
ITGAE	rs6502743	17	3617632	intron	58 (1)	C>A	1	0.67	0.3	0.27729	0.975	0.9553
ITGAE	rs58196389	17	3618870	intron	10 (4)	A>G	1	0.97	0.09	NA	NA	NA
ITGAE	rs9916609	17	3619263	intron	55 (1)	A>C	0.999	0.75	0.3	0.280367	0.9927	0.9847
ITGAE	rs12604024	17	3620902	intron	56 (1)	A>G	1	0.18	0.3	0.264753	0.95	0.8931
ITGAE	rs11649973	17	3621288	intron	2 (10)	C>G	1	0.83	0.09	0.0717207	0.9781	0.8678
ITGAE	rs117361715	17	3621579	intron	26 (2)	n.a.		Poor clustering		NA	NA	NA
ITGAE	rs7209750	17	3622085	intron	2 (10)	G>C	1	0.96	0.08	0.0720642	0.9753	0.8498
ITGAE	rs78884712	17	3623091	intron	73 (1)	G>A	1	0.93	0.18	NA	NA	NA
ITGAE	rs36026186	17	3623952	intron	15 (3)	A>G	1	0.41	0.08	NA	NA	NA
ITGAE	rs34131517	17	3626423	intron	105 (1)	A>G	1	0.28	0.03	NA	NA	NA
ITGAE	rs35286032	17	3632738	intron	11 (4)	C>A	1	0.62	0.05	NA	NA	NA
ITGAE	rs72825422	17	3635226	intron	81 (1)	A>G	0.999	0.82	0.13	NA	NA	NA
ITGAE	rs11869207	17	3636575	intron	34 (1)	G>A	0.998	0.98	0.43	0.456021	0.6272	0.3633
ITGAE	rs11651728	17	3640149	intron	35 (1)	G>C	0.999	0.44	0.47	0.492758	0.6155	0.3415
ITGAE	rs9902054	17	3640574	intron	61 (1)	n.a.		Poor clustering		NA	NA	NA
ITGAE	rs12051659	17	3641355	intron	51 (1)	n.a.		Poor clustering		NA	NA	NA
ITGAE	rs17175691	17	3642730	intron	85 (1)	G>A	1	0.08	0.16	0.113106	0.8144	0.2481
ITGAE	rs6502747	17	3644713	intron	20 (2)	A>G	0.996	0.48	0.2	NA	NA	NA
ITGAE	rs117173265	17	3645973	intron	93 (1)	n.a.		Poor clustering		NA	NA	NA
ITGAE	rs80153256	17	3646164	intron	46 (1)	n.a.		Poor clustering		NA	NA	NA
ITGAE	rs11078464	17	3646824	intron	7 (4)	T>A	0.9899	0.24	0.28	0.251675	0.703	0.3646
ITGAE	rs11078465	17	3647000	intron	54 (1)	G>C	1	0.09	0.29	0.246082	0.7124	0.3752
ITGAE	rs9915516	17	3648337	intron	72 (1)	A>G	0.993	0.86	0.2	0.165712	0.8001	0.4272
ITGAE	rs9914255	17	3649061	intron	77 (1)	G>C	0.999	0.51	0.16	0.146048	0.8178	0.4252
ITGAE	rs4300684	17	3650531	intron	84 (1)	G>A	0.999	0.61	0.09	0.0824013	0.9899	0.9433
ITGAE	rs3809805	17	3651232	5' UTR	79 (1)	n.a.		Poor clustering		NA	NA	NA
ITGAE	rs2891	17	3652275	5' (989)	28 (1)	A>G	0.999	0.69	0.49	0.493943	0.9973	0.9947
ITGAE	rs78365117	17	3653704	5' (2,418)	99 (1)	G>A	0.999	0.46	0.1	NA	NA	NA
ITGAE	rs7503464	17	3654783	5' (3,497)	17 (2)	A>G	1	0.69	0.48	0.473302	0.8545	0.7773
ITGAE	rs9901371	17	3655968	5' (4,682)	30 (1)	G>A	1	0.38	0.47	NA	NA	NA
KLF10	rs12114453	8	103726082	3' (4,115)	7 (1)	A>G	1	0.06	0.35	0.376965	0.9271	0.8628
KLF10	rs16869676	8	103726173	3' (4,024)	4 (3)	G>A	1	0.63	0.09	0.0823179	0.9998	0.9991
KLF10	rs2436969	8	103726285	3' (3,912)	5 (2)	G>A	1	0.96	0.14	0.141392	0.9969	0.9884
KLF10	rs1991934	8	103726642	3' (3,555)	9 (1)	A>G	1	0.66	0.21	0.209817	0.9775	0.9416
KLF10	rs6981411	8	103727887	3' (2,310)	10 (1)	A>G	1	0.69	0.16	0.162804	0.9979	0.993
KLF10	rs2511718	8	103728121	3' (2,076)	3 (4)	G>A	0.998	0.58	0.12	0.118825	0.9997	0.999
KLF10	rs6935	8	103730518	3' UTR	8 (1)	C>A	0.995	0.82	0.5	NA	NA	NA
KLF10	rs12547834	8	103730987	3' UTR	6 (2)	A>G	1	0.44	0.07	0.0779944	0.9838	0.9111
KLF10	rs11552577	8	103733088	synonymous	11 (1)	A>C	1	0.7	0.17	NA	NA	NA
KLF10	rs11779292	8	103735147	intron	12 (1)	n.a.		Poor clustering		NA	NA	NA
KLF10	rs117431243	8	103735394	intron	15 (1)	A>T	0.996	0.67	0.04	NA	NA	NA
KLF10	rs79614714	8	103737148	5' (20)	13 (1)	G>A	0.999	0.51	0.05	NA	NA	NA
KLF10	rs72685128	8	103738662	5' (1,534)	2 (5)	C>A	1	0.26	0.1	NA	NA	NA
KLF10	rs4734654	8	103739167	5' (2,039)	1 (5)	A>G	1	0.48	0.37	0.371043	0.9321	0.8751
KLF10	rs75695975	8	103740327	5' (3,199)	14 (1)	n.a.		Poor clustering		NA	NA	NA
LAG3	rs17887160	12	6747982	5' (3,949)	4 (1)	G>A	1	0.84	0.26	NA	NA	NA
LAG3	rs12313899	12	6748119	5' (3,812)	1 (3)	A>G	1	0.17	0.41	0.430577	0.9755	0.9579
LAG3	rs67706382	12	6748451	5' (3,480)	8 (1)	G>A	1	0.17	0.18	NA	NA	NA
LAG3	rs2301333	12	6751257	5' (674)	13 (1)	G>A	1	0.97	0.05	0.0604968	0.995	0.9653
LAG3	rs2365094	12	6753931	intron	9 (1)	G>C	1	0.24	0.29	0.220343	0.8028	0.5476
LAG3	rs2302365	12	6754505	intron	3 (1)	n.a.		Call Rate < 95%		NA	NA	NA
LAG3	rs3782735	12	6755337	intron	5 (1)	A>G	1	0.65	0.4	0.40736	0.9965	0.9941
LAG3	rs4764620	12	6755490	intron	6 (1)	A>G	1	0.48	0.33	NA	NA	NA
LAG3	rs1882545	12	6755671	intron	7 (1)	A>G	1	0.7	0.35	0.346536	0.9963	0.9934
LAG3	rs870849	12	6757281	I455T	2 (1)	G>A	1	0.25	0.4	0.398384	0.993	0.9875
LAG3	rs11064382	12	6761456	3' (3,576)	12 (1)	G>A	1	0.3	0.13	0.116438	0.9393	0.7816
LRRC32	rs7950838	11	76041465	3' (4,757)	7 (1)	G>A	1	0.45	0.49	0.479523	0.9947	0.9919
LRRC32	rs1892952	11	76042374	3' (3,848)	8 (1)	A>G	1	0.42	0.49	0.483732	0.9985	0.9974
LRRC32	rs11236836	11	76043103	3' (3,119)	12 (1)	A>G	1	0.26	0.48	0.458557	0.9248	0.8817
LRRC32	rs7943302	11	76043419	3' (2,803)	17 (1)	G>C	1	0.75	0.21	NA	NA	NA
LRRC32	rs61893515	11	76044173	3' (2,049)	21 (1)	G>A	1	0.54	0.18	NA	NA	NA
LRRC32	rs12718488	11	76044338	3' (1,884)	15 (1)	A>C	0.999	0.47	0.34	NA	NA	NA
LRRC32	rs4944114	11	76045334	3' (888)	32 (1)	G>A	1	0.68	0.04	0.0334418	0.9794	0.7753
LRRC32	rs6592656	11	76045702	3' (520)	2 (2)	G>C	1	0.57	0.48	0.486943	0.9558	0.9284
LRRC32	rs4945097	11	76046201	3' (21)	13 (1)	A>G	0.999	0.27	0.48	0.48524	0.991	0.986
LRRC32	rs7685	11	76046287	3' UTR	1 (7)	A>C	1	0.67	0.35	NA	NA	NA
LRRC32	rs3197153	11	76046720	3' UTR	1 (7)	A>G	0.998	0.83	0.34	0.360354	0.9789	0.9683
LRRC32	rs1803627	11	76046992	3' UTR	6 (2)	A>C	1	0.19	0.1	0.104381	0.9931	0.9705
LRRC32	rs3781701	11	76047067	3' UTR	1 (7)	G>A	0.9889	0.85	0.35	0.350518	0.9925	0.9879
LRRC32	rs3781700	11	76047357	3' UTR	1 (7)	C>A	0.994	2.3e-06	0.33	0.352112	0.983	0.97
LRRC32	rs3781699	11	76047433	3' UTR	1 (7)	A>C	1	0.63	0.35	0.353717	0.9743	0.9563
LRRC32	rs11236839	11	76047561	3' UTR	19 (1)	G>A	0.999	0.84	0.21	0.212772	0.9947	0.9878
LRRC32	rs3824890	11	76047652	3' UTR	25 (1)	G>A	0.999	0.55	0.1	0.11465	0.957	0.8444
LRRC32	rs1320645	11	76047736	3' UTR	11 (1)	C>A	1	0.57	0.5	0.495946	0.9229	0.8828
LRRC32	rs3740778	11	76050066	coding	24 (1)	G>A	1	0.55	0.14	0.127822	0.9943	0.98
LRRC32	rs10751259	11	76050212	intron	4 (2)	G>A	0.996	0.6	0.4	NA	NA	NA
LRRC32	rs7944357	11	76051687	intron	10 (1)	G>A	0.998	0.27	0.44	0.435746	0.957	0.936
LRRC32	rs72936105	11	76054084	intron	29 (1)	G>C	1	0.74	0.11	NA	NA	NA
LRRC32	rs4944115	11	76054953	intron	26 (1)	A>C	1	0.74	0.12	0.117576	0.9585	0.8512
LRRC32	rs6592657	11	76055467	intron	3 (2)	G>A	1	0.1	0.43	0.442624	0.9955	0.9927
LRRC32	rs11236843	11	76055747	intron	28 (1)	A>G	0.999	0.77	0.12	NA	NA	NA
LRRC32	rs61893519	11	76056774	intron	30 (1)	A>G	1	0.91	0.05	NA	NA	NA
LRRC32	rs17812076	11	76057554	intron	14 (1)	C>A	1	0.43	0.37	NA	NA	NA
LRRC32	rs10899249	11	76058005	intron	9 (1)	A>G	1	0.31	0.5	0.483974	0.9976	0.9966
LRRC32	rs11606717	11	76058385	intron	22 (1)	G>A	1	0.36	0.13	NA	NA	NA
LRRC32	rs117051189	11	76059462	5' (919)	27 (1)	n.a.		Poor clustering		NA	NA	NA
LRRC32	rs3814710	11	76059608	5' (1,065)	5 (2)	G>A	0.998	0.35	0.37	NA	NA	NA
LRRC32	rs947998	11	76061454	5' (2,911)	23 (1)	C>A	0.997	0.19	0.12	0.121078	0.9993	0.9975
LRRC32	rs12362027	11	76062710	5' (4,167)	31 (1)	C>G	1	0.78	0.05	NA	NA	NA
MDFIC	rs13241812	7	114346595	5' (2,850)	38 (1)	n.a.		Poor clustering		NA	NA	NA
MDFIC	rs61499730	7	114347013	5' (2,432)	16 (2)	G>A	1	0.07	0.15	NA	NA	NA
MDFIC	rs4335064	7	114347118	5' (2,327)	27 (1)	A>C	1	0.25	0.39	0.378995	0.9543	0.922
MDFIC	rs12706002	7	114348063	5' (1,382)	42 (1)	G>A	1	0.66	0.16	NA	NA	NA
MDFIC	rs61743574	7	114349659	5' UTR	35 (1)	G>A	0.9859	0.9	0.14	NA	NA	NA
MDFIC	rs2709507	7	114352579	intron	45 (1)	G>A	1	0.23	0.07	0.0880217	0.9978	0.9883
MDFIC	rs6961343	7	114353505	intron	12 (3)	T>A	1	0.16	0.07	0.0879416	0.9982	0.9898
MDFIC	rs13225906	7	114355340	intron	21 (1)	A>G	1	0.81	0.44	0.464403	0.9989	0.9977
MDFIC	rs10262081	7	114355615	intron	43 (1)	A>C	0.999	0.05	0.08	NA	NA	NA
MDFIC	rs7777885	7	114357045	intron	1 (13)	C>A	1	0.04	0.08	0.0876561	0.9998	0.9988
MDFIC	rs4466338	7	114360380	intron	48 (1)	C>G	1	0.05	0.08	0.087606	0.9997	0.9984
MDFIC	rs115703898	7	114360562	intron	51 (1)	n.a.		Poor clustering		NA	NA	NA
MDFIC	rs17583919	7	114366668	intron	49 (1)	A>G	1	0.41	0.07	0.0691838	0.9339	0.5997
MDFIC	rs4615508	7	114369427	intron	39 (1)	G>A	0.998	0.8	0.14	0.1458	0.9938	0.9798
MDFIC	rs2594460	7	114369931	intron	18 (2)	A>G	1	0.24	0.07	0.0876134	0.9992	0.9956
MDFIC	rs2594458	7	114373041	intron	44 (1)	A>G	0.998	0.46	0.07	0.0874656	0.9934	0.9617
MDFIC	rs6979441	7	114374530	intron	17 (2)	G>A	1	0.49	0.07	0.0714744	0.9989	0.9925
MDFIC	rs4344019	7	114375776	intron	1 (13)	G>A	0.998	0.05	0.08	0.0881666	0.9684	0.8527
MDFIC	rs10247983	7	114377464	intron	47 (1)	A>G	0.999	0.12	0.08	0.0855629	0.9745	0.8805
MDFIC	rs10281007	7	114378267	intron	41 (1)	C>A	0.999	0.63	0.07	NA	NA	NA
MDFIC	rs4727809	7	114379285	intron	25 (1)	n.a.		Poor clustering		NA	NA	NA
MDFIC	rs7800698	7	114379469	intron	36 (1)	A>G	1	0.17	0.14	0.152237	0.9854	0.9559
MDFIC	rs2709505	7	114384077	intron	56 (1)	A>C	1	0.34	0.07	0.0603411	0.971	0.8273
MDFIC	rs7802986	7	114384744	intron	2 (6)	G>A	1	0.79	0.46	0.463493	0.9986	0.9973
MDFIC	rs112375860	7	114385601	intron	55 (1)	C>A	1	0.9	0.06	NA	NA	NA
MDFIC	rs7783637	7	114388330	intron	11 (3)	G>A	1	0.45	0.1	0.101755	0.9972	0.9881
MDFIC	rs116862091	7	114390663	intron	59 (1)	A>T	1	0.81	0.07	NA	NA	NA
MDFIC	rs10273599	7	114393815	intron	26 (1)	G>A	1	0.92	0.45	NA	NA	NA
MDFIC	rs2594452	7	114399345	intron	14 (2)	G>A	0.999	0.78	0.4	0.422009	0.9644	0.9478
MDFIC	rs12538651	7	114400511	intron	46 (1)	A>G	0.994	0.22	0.08	0.084506	0.9971	0.9848
MDFIC	rs4730660	7	114401074	intron	53 (1)	A>G	1	0.86	0.11	0.101261	0.9955	0.9787
MDFIC	rs73214714	7	114404153	intron	54 (1)	A>G	1	1	0.04	NA	NA	NA
MDFIC	rs7799732	7	114408696	intron	7 (3)	G>A	0.999	0.62	0.47	0.468406	0.9719	0.9578
MDFIC	rs62470665	7	114410100	intron	23 (1)	G>A	1	0.51	0.38	NA	NA	NA
MDFIC	rs6466505	7	114410802	intron	22 (1)	A>G	1	0.96	0.43	0.44413	0.9996	0.9993
MDFIC	rs34264986	7	114414115	intron	52 (1)	A>G	1	0.83	0.1	NA	NA	NA
MDFIC	rs12537464	7	114414429	intron	3 (6)	A>G	1	0.57	0.11	0.106323	0.9911	0.9585
MDFIC	rs7784447	7	114416521	intron	5 (4)	G>A	1	0.55	0.29	0.310964	0.9998	0.9995
MDFIC	rs34808205	7	114423985	intron	10 (3)	A>C	1	0.85	0.1	NA	NA	NA
MDFIC	rs6957727	7	114426213	intron	29 (1)	A>G	0.999	0.15	0.22	0.277052	0.9538	0.9087
MDFIC	rs2709517	7	114428062	intron	4 (4)	G>A	1	0.12	0.46	0.442183	0.9982	0.9969
MDFIC	rs4380861	7	114431164	intron	8 (3)	G>A	0.999	0.53	0.43	0.446951	0.9879	0.979
MDFIC	rs117622060	7	114434224	intron	40 (1)	n.a.		Poor clustering		NA	NA	NA
MDFIC	rs2709501	7	114435489	intron	20 (2)	A>G	1	0.15	0.07	0.057886	0.9997	0.9975
MDFIC	rs6961386	7	114441275	intron	19 (2)	G>A	0.997	0.78	0.1	0.115653	0.9999	0.9995
MDFIC	rs1055521	7	114445456	3' UTR	31 (1)	A>G	1	0.9	0.31	0.3168	0.975	0.9504
MDFIC	rs13237006	7	114445722	3' UTR	33 (1)	n.a.		Call Rate < 95%		NA	NA	NA
MDFIC	rs17585463	7	114446731	3' (230)	6 (4)	A>T	1	0.16	0.23	0.262404	0.9814	0.9594
MDFIC	rs2709496	7	114450257	3' (3,756)	13 (2)	A>G	1	0.37	0.46	0.419912	0.974	0.9546
MDFIC	rs10241046	7	114451387	3' (4,886)	9 (3)	C>G	1	0.9	0.09	NA	NA	NA
NRP1	rs2474738	10	33502293	3' (4,139)	105 (1)	n.a.		Poor clustering		NA	NA	NA
NRP1	rs7099537	10	33502584	3' (3,848)	68 (2)	A>G	0.999	0.15	0.07	0.067205	1	0.9999
NRP1	rs7912484	10	33503607	3' (2,825)	14 (8)	A>G	1	0.72	0.05	0.0436151	1	0.9999
NRP1	rs17599379	10	33504585	3' (1,847)	92 (1)	n.a.		Call Rate < 95%		NA	NA	NA
NRP1	rs2474737	10	33504934	3' (1,498)	111 (1)	G>A	1	0.63	0.16	0.159713	0.9922	0.9736
NRP1	rs79616072	10	33505464	3' (968)	139 (1)	A>G	1	0.12	0.07	NA	NA	NA
NRP1	rs1044268	10	33506572	3' UTR	34 (4)	G>A	1	0.33	0.12	0.134214	0.9999	0.9997
NRP1	rs10080	10	33507114	3' UTR	48 (2)	G>A	1	0.99	0.41	0.425149	0.9548	0.918
NRP1	rs1044210	10	33507327	3' UTR	13 (8)	C>A	1	0.22	0.28	0.292733	0.9958	0.9911
NRP1	rs2506140	10	33507545	3' UTR	22 (5)	A>G	1	0.5	0.16	0.158162	0.9986	0.9955
NRP1	rs2506141	10	33508020	3' UTR	70 (1)	A>G	1	0.92	0.47	0.490401	0.9413	0.8989
NRP1	rs2506142	10	33508130	3' UTR	93 (1)	n.a.		HWE pval < .0001		NA	NA	NA
NRP1	rs2506144	10	33508462	3' UTR	22 (5)	G>A	1	0.53	0.16	0.158012	0.9999	0.9996
NRP1	rs1048804	10	33509187	synonymous	98 (1)	A>G	1	0.38	0.23	0.260575	0.9695	0.9365
NRP1	rs2474732	10	33509711	intron	123 (1)	A>G	1	0.37	0.11	0.121542	0.9731	0.911
NRP1	rs2506145	10	33511136	intron	58 (2)	A>G	0.997	0.23	0.13	0.125936	0.9995	0.9982
NRP1	rs77424218	10	33511769	intron	131 (1)	n.a.		Poor clustering		NA	NA	NA
NRP1	rs2474728	10	33513749	intron	16 (7)	G>A	1	0.35	0.11	0.107701	0.9895	0.9558
NRP1	rs2228638	10	33515288	V733I	33 (4)	G>A	0.999	0.23	0.11	0.103387	0.9998	0.9988
NRP1	rs2073322	10	33516357	intron	38 (3)	G>A	1	0.81	0.26	0.262672	0.9873	0.975
NRP1	rs55696830	10	33517959	intron	102 (1)	G>C	1	0.5	0.23	NA	NA	NA
NRP1	rs34217492	10	33519964	intron	165 (1)	n.a.		Poor clustering		NA	NA	NA
NRP1	rs12572518	10	33520147	intron	147 (1)	G>C	1	0.79	0.12	NA	NA	NA
NRP1	rs12573679	10	33520321	intron	43 (3)	A>C	1	0.76	0.12	NA	NA	NA
NRP1	rs2243920	10	33521484	intron	80 (1)	A>G	1	0.4	0.36	0.351447	0.9904	0.9825
NRP1	rs10827207	10	33522358	intron	160 (1)	G>A	0.999	0.77	0.12	NA	NA	NA
NRP1	rs2506151	10	33524193	intron	21 (5)	G>A	1	0.32	0.24	NA	NA	NA
NRP1	rs734186	10	33524835	intron	10 (9)	G>A	1	0.55	0.38	0.375767	0.9996	0.9993
NRP1	rs2506153	10	33524928	intron	120 (1)	G>A	1	0.71	0.12	0.0212857	0.9923	0.8555
NRP1	rs2474723	10	33525968	intron	96 (1)	A>G	0.995	0.24	0.27	NA	NA	NA
NRP1	rs9299705	10	33528146	intron	56 (2)	A>G	1	0.31	0.18	0.0731784	0.9387	0.6587
NRP1	rs11009281	10	33528820	intron	174 (1)	A>G	1	0.31	0.09	0.0971958	0.9779	0.9005
NRP1	rs2247486	10	33529600	intron	50 (2)	A>G	1	0.82	0.41	0.422928	0.9675	0.9532
NRP1	rs41306338	10	33530109	intron	6 (10)	A>G	1	0.94	0.14	NA	NA	NA
NRP1	rs2284944	10	33530847	intron	3 (20)	G>A	1	0.46	0.23	0.241934	0.9784	0.9611
NRP1	rs11009285	10	33531041	intron	3 (20)	G>A	1	0.44	0.23	NA	NA	NA
NRP1	rs2284942	10	33534861	intron	1 (44)	A>G	1	0.89	0.25	NA	NA	NA
NRP1	rs2474715	10	33535312	intron	12 (8)	A>G	0.998	0.96	0.46	0.460663	0.9986	0.9974
NRP1	rs10827212	10	33536295	intron	46 (3)	A>G	1	0.98	0.11	0.106803	0.9633	0.8644
NRP1	rs2474712	10	33537715	intron	100 (1)	A>G	1	0.52	0.2	0.205739	0.9797	0.9515
NRP1	rs2269103	10	33539226	intron	17 (7)	C>A	1	0.96	0.11	0.107326	0.967	0.8756
NRP1	rs2506155	10	33543185	intron	119 (1)	C>A	0.992	0.78	0.15	0.159467	0.9992	0.9973
NRP1	rs2254826	10	33544471	intron	47 (2)	C>A	1	0.83	0.46	0.468737	0.9999	0.9998
NRP1	rs1411923	10	33546784	intron	1 (44)	G>A	1	0.93	0.26	0.265818	1	1
NRP1	rs1360456	10	33546934	intron	1 (44)	G>A	0.998	0.94	0.26	0.265827	0.9998	0.9996
NRP1	rs2273466	10	33551053	intron	23 (5)	A>G	1	0.96	0.18	0.18142	0.9999	0.9996
NRP1	rs2269095	10	33553797	intron	20 (5)	A>G	1	0.77	0.28	0.288474	0.9966	0.9936
NRP1	rs3851076	10	33554562	intron	6 (10)	A>G	1	0.77	0.14	0.150634	0.9917	0.9717
NRP1	rs56239610	10	33556485	intron	53 (2)	G>A	1	0.63	0.3	NA	NA	NA
NRP1	rs11009309	10	33557589	intron	168 (1)	C>A	1	0.2	0.08	0.0770665	0.9599	0.8113
NRP1	rs1331317	10	33557653	intron	31 (4)	A>G	1	0.93	0.33	0.331273	0.9997	0.9994
NRP1	rs11009311	10	33560360	intron	133 (1)	C>A	1	0.45	0.16	0.158615	0.9975	0.9927
NRP1	rs72790215	10	33561404	intron	97 (1)	G>C	1	0.73	0.2	NA	NA	NA
NRP1	rs78905792	10	33561637	intron	146 (1)	n.a.		Poor clustering		NA	NA	NA
NRP1	rs77828306	10	33562263	intron	66 (2)	G>A	1	0.84	0.08	NA	NA	NA
NRP1	rs1331314	10	33564687	intron	26 (5)	G>C	1	0.87	0.11	0.115726	0.9958	0.9829
NRP1	rs77211942	10	33565524	intron	167 (1)	G>A	1	0.69	0.04	NA	NA	NA
NRP1	rs927099	10	33565842	intron	35 (3)	G>A	1	0.71	0.49	0.486977	0.9658	0.9506
NRP1	rs7915584	10	33567378	intron	54 (2)	A>T	1	0.19	0.19	0.192637	0.9901	0.9754
NRP1	rs56242597	10	33568277	intron	101 (1)	A>G	0.999	0.86	0.2	NA	NA	NA
NRP1	rs56291819	10	33569061	intron	57 (2)	A>C	0.999	0.92	0.18	NA	NA	NA
NRP1	rs12762312	10	33570303	intron	51 (2)	G>A	1	0.76	0.36	0.349975	0.9717	0.9497
NRP1	rs12570078	10	33572136	intron	162 (1)	G>A	1	0.94	0.1	NA	NA	NA
NRP1	rs10827219	10	33572589	intron	72 (1)	C>A	1	0.66	0.5	NA	NA	NA
NRP1	rs17413169	10	33573154	intron	90 (1)	A>G	0.999	0.06	0.26	0.270963	0.9912	0.9833
NRP1	rs117540682	10	33573805	intron	169 (1)	A>C	1	0.5	0.03	NA	NA	NA
NRP1	rs10490939	10	33574886	intron	118 (1)	G>A	1	0.42	0.16	0.154806	0.9998	0.9994
NRP1	rs60232263	10	33575170	intron	134 (1)	T>A	1	0.53	0.13	NA	NA	NA
NRP1	rs72790230	10	33575529	intron	117 (1)	n.a.		Poor clustering		NA	NA	NA
NRP1	rs725328	10	33576543	intron	4 (15)	G>A	0.999	0.55	0.13	0.1328	0.9995	0.9982
NRP1	rs61843210	10	33577669	intron	135 (1)	T>A	1	0.53	0.13	NA	NA	NA
NRP1	rs12779935	10	33577963	intron	4 (15)	A>G	0.999	0.52	0.13	NA	NA	NA
NRP1	rs2383987	10	33579334	intron	27 (5)	A>G	1	0.12	0.07	0.0671814	0.9999	0.9994
NRP1	rs11598565	10	33580454	intron	74 (1)	A>G	1	0.09	0.43	0.428648	0.9951	0.9915
NRP1	rs10763919	10	33581712	intron	24 (5)	T>A	1	0.3	0.2	0.200132	0.9928	0.9823
NRP1	rs7074620	10	33582841	intron	49 (2)	n.a.		Poor clustering		NA	NA	NA
NRP1	rs1537174	10	33583872	intron	137 (1)	n.a.		Poor clustering		NA	NA	NA
NRP1	rs1319013	10	33583935	intron	36 (3)	C>A	1	0.02	0.46	0.456673	0.9951	0.9921
NRP1	rs7096016	10	33584222	intron	173 (1)	C>A	0.997	0.08	0.04	0.0393703	0.9987	0.9856
NRP1	rs1028548	10	33584843	intron	91 (1)	T>A	1	0.06	0.25	0.260142	0.9826	0.9655
NRP1	rs11593943	10	33585087	intron	77 (1)	G>A	0.998	0.25	0.4	0.388856	0.9958	0.9927
NRP1	rs10827221	10	33585470	intron	84 (1)	G>C	1	0.02	0.31	0.310049	0.9844	0.9708
NRP1	rs3780869	10	33587471	intron	59 (2)	G>A	1	0.35	0.15	0.150687	0.9999	0.9996
NRP1	rs10490938	10	33588382	intron	40 (3)	G>A	0.999	0.01	0.17	0.176515	0.9998	0.9993
NRP1	rs16934292	10	33589474	intron	64 (2)	G>A	1	0.2	0.1	0.0928643	0.9989	0.9948
NRP1	rs11598845	10	33589567	intron	41 (3)	A>G	0.999	0.92	0.15	0.144638	0.9985	0.9946
NRP1	rs116968267	10	33589946	intron	171 (1)	n.a.		Poor clustering		NA	NA	NA
NRP1	rs2383988	10	33591688	intron	81 (1)	G>A	0.996	0.99	0.37	0.372408	0.9945	0.9896
NRP1	rs2073320	10	33593263	intron	19 (5)	G>A	1	0.71	0.39	0.389444	0.9997	0.9995
NRP1	rs2284938	10	33594059	intron	126 (1)	n.a.		Poor clustering		NA	NA	NA
NRP1	rs11819443	10	33594248	intron	138 (1)	G>A	1	0.3	0.12	0.116208	0.9986	0.9942
NRP1	rs72790248	10	33594662	intron	155 (1)	G>A	1	0.52	0.07	NA	NA	NA
NRP1	rs6481842	10	33595368	intron	76 (1)	C>A	1	0.71	0.39	0.387826	0.9749	0.9541
NRP1	rs1331312	10	33595519	intron	9 (9)	C>G	1	0.46	0.47	0.484352	0.9622	0.938
NRP1	rs78483727	10	33596627	intron	28 (5)	G>A	0.999	0.89	0.05	NA	NA	NA
NRP1	rs73251999	10	33596719	intron	141 (1)	A>G	1	0.2	0.1	NA	NA	NA
NRP1	rs7095842	10	33597827	intron	67 (2)	A>G	1	0.18	0.08	NA	NA	NA
NRP1	rs10827225	10	33599092	intron	15 (7)	A>T	0.997	0.14	0.13	0.134117	0.9502	0.8339
NRP1	rs4934584	10	33600558	intron	115 (1)	A>G	1	0.71	0.18	0.147786	0.9637	0.8973
NRP1	rs12769036	10	33600711	intron	124 (1)	T>A	0.999	0.17	0.15	0.149977	0.9622	0.8898
NRP1	rs11009328	10	33601112	intron	104 (1)	C>A	1	0.27	0.19	0.0607014	0.9831	0.8837
NRP1	rs17296443	10	33601580	intron	110 (1)	G>A	1	0.42	0.17	0.160518	0.9931	0.9774
NRP1	rs10827227	10	33601794	intron	73 (1)	G>A	1	0.81	0.43	0.437352	0.9871	0.977
NRP1	rs9299707	10	33602908	intron	89 (1)	T>A	1	0.91	0.23	0.232652	0.9583	0.9098
NRP1	rs2243668	10	33603899	intron	129 (1)	G>A	1	0.79	0.11	0.111211	0.9996	0.9984
NRP1	rs117827557	10	33604514	intron	69 (2)	G>A	1	1	0	NA	NA	NA
NRP1	rs78540951	10	33605654	intron	170 (1)	G>A	1	0.69	0.04	NA	NA	NA
NRP1	rs11009330	10	33606885	intron	136 (1)	A>C	1	0.96	0.14	NA	NA	NA
NRP1	rs10827228	10	33607139	intron	18 (6)	C>A	1	0.52	0.48	0.479592	0.98	0.9662
NRP1	rs75731135	10	33608874	intron	159 (1)	A>G	1	0.9	0.07	NA	NA	NA
NRP1	rs869636	10	33612045	intron	30 (4)	A>G	0.999	0.35	0.37	0.367849	0.9999	0.9998
NRP1	rs10763923	10	33613405	intron	5 (10)	A>G	1	0.53	0.34	0.349035	0.9976	0.9954
NRP1	rs2804470	10	33613636	intron	65 (2)	A>G	0.998	0.8	0.11	0.110648	0.9998	0.9991
NRP1	rs7079372	10	33613812	intron	114 (1)	G>A	1	0.32	0.19	0.202171	0.9999	0.9999
NRP1	rs2776928	10	33614411	intron	44 (3)	A>G	0.999	0.27	0.08	0.0915346	1	0.9999
NRP1	rs72790258	10	33614839	intron	166 (1)	G>A	1	0.46	0.08	NA	NA	NA
NRP1	rs79137925	10	33619191	intron	42 (3)	A>G	1	0.04	0.07	NA	NA	NA
NRP1	rs1331326	10	33619896	intron	5 (10)	A>G	1	0.6	0.34	0.35052	0.9996	0.9993
NRP1	rs4934871	10	33623095	intron	113 (1)	G>A	1	0.87	0.19	0.176893	0.9962	0.9895
NRP1	rs12780696	10	33623837	intron	158 (1)	C>A	1	0.81	0.08	NA	NA	NA
NRP1	rs4277057	10	33626696	intron	7 (10)	C>A	0.999	0.37	0.15	0.131856	0.9985	0.9949
NRP1	rs12573233	10	33627876	intron	7 (10)	n.a.		Call Rate < 95%		NA	NA	NA
NRP1	rs1331324	10	33629471	intron	29 (4)	C>G	1	0.98	0.47	0.476339	0.9898	0.9819
NRP1	rs11009334	10	33631427	intron	62 (2)	A>G	1	0.48	0.13	NA	NA	NA
NRP1	rs2776932	10	33632412	intron	63 (2)	A>G	1	0.82	0.14	0.153179	0.9995	0.9984
NRP1	rs4934896	10	33633615	intron	55 (2)	A>G	0.998	0.28	0.21	NA	NA	NA
NRP1	rs78052786	10	33633942	intron	45 (3)	G>A	1	0.86	0.05	NA	NA	NA
NRP1	rs2065364	10	33634008	intron	52 (2)	G>A	1	0.93	0.26	0.276473	0.9996	0.9991
NRP1	rs114362575	10	33635550	intron	107 (1)	n.a.		Poor clustering		NA	NA	NA
NRP1	rs4934901	10	33636052	intron	112 (1)	A>T	0.996	0.46	0.21	0.189597	0.9892	0.9724
NRP1	rs11009336	10	33637775	intron	128 (1)	C>A	0.999	0.46	0.13	NA	NA	NA
NRP1	rs12358711	10	33638553	intron	71 (1)	T>A	1	0.6	0.48	0.454939	0.981	0.9719
NRP1	rs77765204	10	33640237	intron	161 (1)	C>A	1	0.8	0.05	NA	NA	NA
NRP1	rs56810162	10	33640887	intron	32 (4)	A>G	1	0.58	0.12	NA	NA	NA
NRP1	rs117247294	10	33641168	intron	172 (1)	G>A	1	1	0.01	NA	NA	NA
NRP1	rs2804492	10	33642052	intron	75 (1)	G>A	1	0.53	0.41	0.404307	0.9991	0.9982
NRP1	rs28384345	10	33642951	intron	83 (1)	n.a.		Poor clustering		NA	NA	NA
NRP1	rs2768421	10	33643268	intron	78 (1)	A>G	0.997	0.04	0.34	NA	NA	NA
NRP1	rs76932011	10	33643718	intron	8 (10)	G>A	1	0.72	0.04	NA	NA	NA
NRP1	rs2776937	10	33646195	intron	87 (1)	G>A	0.999	0.28	0.24	0.24806	0.9994	0.9987
NRP1	rs11009338	10	33646312	intron	79 (1)	T>A	0.998	0.28	0.35	0.353986	0.8612	0.7566
NRP1	rs61843241	10	33647718	intron	164 (1)	n.a.		Poor clustering		NA	NA	NA
NRP1	rs75860236	10	33649894	intron	156 (1)	G>A	0.999	1	0.04	NA	NA	NA
NRP1	rs2776922	10	33651888	intron	39 (3)	G>A	0.993	0.27	0.16	0.147885	0.9795	0.9349
NRP1	rs17296492	10	33653038	intron	175 (1)	A>G	1	0.84	0.07	NA	NA	NA
NRP1	rs10827236	10	33653158	intron	2 (21)	A>G	1	0.14	0.08	0.0880241	0.9985	0.992
NRP1	rs1411926	10	33655900	intron	145 (1)	A>T	0.992	0.02	0.04	NA	NA	NA
NRP1	rs11009344	10	33656091	intron	61 (2)	G>A	1	0.39	0.12	0.136719	0.9993	0.9976
NRP1	rs12359279	10	33657239	intron	176 (1)	G>A	1	0.15	0.08	NA	NA	NA
NRP1	rs61758245	10	33659131	intron	8 (10)	A>G	1	0.72	0.05	NA	NA	NA
NRP1	rs117735909	10	33659343	intron	177 (1)	n.a.		Poor clustering		NA	NA	NA
NRP1	rs2804498	10	33660713	intron	37 (3)	A>G	1	0.35	0.28	0.293858	0.9846	0.9666
NRP1	rs75981447	10	33661187	intron	143 (1)	n.a.		Poor clustering		NA	NA	NA
NRP1	rs118021301	10	33661934	intron	150 (1)	n.a.		Poor clustering		NA	NA	NA
NRP1	rs78236030	10	33662140	intron	11 (9)	A>G	1	1	0.04	NA	NA	NA
NRP1	rs1888684	10	33662983	intron	25 (5)	G>A	1	0.86	0.11	0.110382	0.9963	0.9843
NRP1	rs3750733	10	33663257	synonymous	148 (1)	G>A	1	0.14	0.07	0.0868474	0.9958	0.979
NRP1	rs35320960	10	33663449	5' UTR	149 (1)	G>A	0.999	0.001	0.07	NA	NA	NA
NRP1	rs80286291	10	33664439	5' (600)	2 (21)	C>A	0.998	0.3	0.07	NA	NA	NA
NRP1	rs112578611	10	33666155	5' (2,316)	86 (1)	n.a.		Poor clustering		NA	NA	NA
PDCD1	rs62193129	2	242436462	3' (4,249)	13 (1)	G>A	1	0.41	0.22	NA	NA	NA
PDCD1	rs55677174	2	242439999	3' (712)	14 (1)	G>A	0.9889	0.73	0.22	NA	NA	NA
PDCD1	rs11568821	2	242442585	intron	12 (1)	G>A	0.998	0.39	0.1	NA	NA	NA
PDCD1	rs7419333	2	242443985	intron	3 (6)	G>C	0.999	0.95	0.34	NA	NA	NA
PDCD1	rs35399295	2	242444615	intron	5 (2)	G>A	0.999	3.4e-10	0.27	NA	NA	NA
PDCD1	rs6605258	2	242445333	intron	4 (2)	G>A	1	0.54	0.41	NA	NA	NA
PDCD1	rs7603052	2	242445501	intron	7 (1)	A>G	0.998	0.72	0.38	NA	NA	NA
PDCD1	rs7565639	2	242445736	intron	8 (1)	G>A	0.997	0.33	0.31	NA	NA	NA
PDCD1	rs7560086	2	242445942	intron	16 (1)	n.a.		Poor clustering		NA	NA	NA
PDCD1	rs13023138	2	242448311	intron	1 (9)	n.a.		Poor clustering		NA	NA	NA
PDCD1	rs41362146	2	242451811	5' (2,080)	2 (7)	G>C	0.999	0.05	0.08	NA	NA	NA
PDCD1	rs41417748	2	242451885	5' (2,154)	18 (1)	n.a.		HWE pval < .0001		NA	NA	NA
PDCD1	rs77147807	2	242452007	5' (2,276)	11 (1)	n.a.		Poor clustering		NA	NA	NA
PDCD1	rs67155746	2	242452100	5' (2,369)	6 (1)	n.a.		Call Rate < 95%		NA	NA	NA
PLAGL1	rs117139692	6	144298505	3' (4,625)	109 (1)	n.a.		Poor clustering		NA	NA	NA
PLAGL1	rs1884088	6	144300343	3' (2,787)	7 (8)	n.a.		Poor clustering		NA	NA	NA
PLAGL1	rs3736746	6	144301247	3' (1,883)	18 (3)	A>G	1	0.77	0.46	0.468347	0.9896	0.9838
PLAGL1	rs3818091	6	144301451	3' (1,679)	24 (3)	n.a.		Poor clustering		NA	NA	NA
PLAGL1	rs12213307	6	144301684	3' (1,446)	78 (1)	C>G	0.9839	0.87	0.11	NA	NA	NA
PLAGL1	rs62427099	6	144303072	3' (58)	17 (4)	G>A	1	0.45	0.12	NA	NA	NA
PLAGL1	rs1049846	6	144303173	3' UTR	20 (3)	n.a.		Poor clustering		NA	NA	NA
PLAGL1	rs6938720	6	144305836	intron	66 (1)	A>G	0.993	1	0.02	NA	NA	NA
PLAGL1	rs9403539	6	144306059	intron	13 (5)	A>G	1	0.36	0.12	0.107658	0.9987	0.9944
PLAGL1	rs2257104	6	144306633	intron	38 (1)	C>A	1	0.97	0.43	NA	NA	NA
PLAGL1	rs2268440	6	144307303	intron	52 (1)	n.a.		Call Rate < 95%		NA	NA	NA
PLAGL1	rs28627035	6	144308876	intron	43 (1)	A>G	1	0.56	0.48	NA	NA	NA
PLAGL1	rs78343481	6	144309322	intron	83 (1)	G>A	1	0.1	0.06	NA	NA	NA
PLAGL1	rs6930726	6	144309787	intron	39 (1)	A>C	1	0.46	0.44	0.459052	0.9898	0.9842
PLAGL1	rs2076682	6	144310345	intron	86 (1)	G>A	1	0.47	0.11	0.106813	0.9949	0.9793
PLAGL1	rs2076683	6	144310647	intron	22 (3)	C>A	1	0.87	0.44	0.446987	0.9986	0.9974
PLAGL1	rs2076684	6	144311234	5' UTR	96 (1)	G>C	1	0.66	0.09	0.0860753	0.9806	0.903
PLAGL1	rs2064494	6	144311626	intron	51 (1)	n.a.		Poor clustering		NA	NA	NA
PLAGL1	rs2064495	6	144311694	intron	61 (1)	A>G	0.999	0.38	0.2	NA	NA	NA
PLAGL1	rs2268442	6	144312022	intron	50 (1)	G>A	0.995	0.8	0.41	NA	NA	NA
PLAGL1	rs17073244	6	144312509	intron	107 (1)	G>A	1	0.46	0.07	NA	NA	NA
PLAGL1	rs2268443	6	144313933	intron	62 (1)	A>G	0.999	0.74	0.3	0.268129	0.9926	0.9852
PLAGL1	rs7770529	6	144314167	intron	37 (1)	G>A	1	0.09	0.4	0.401099	0.8189	0.7141
PLAGL1	rs2268444	6	144314596	intron	95 (1)	G>A	1	0.52	0.11	NA	NA	NA
PLAGL1	rs12528876	6	144315903	intron	79 (1)	A>G	0.999	0.73	0.18	0.142161	0.9518	0.8566
PLAGL1	rs77512896	6	144317387	intron	110 (1)	G>C	1	0.5	0.03	NA	NA	NA
PLAGL1	rs2268445	6	144319128	intron	16 (4)	G>A	1	0.98	0.22	0.232537	0.9119	0.7977
PLAGL1	rs75685935	6	144319757	intron	71 (1)	G>A	1	0.97	0.14	NA	NA	NA
PLAGL1	rs3819812	6	144322492	intron	6 (9)	A>G	1	0.47	0.32	0.304565	0.9999	0.9999
PLAGL1	rs9373409	6	144328911	intron	2 (12)	G>A	1	0.35	0.43	0.439001	0.9994	0.999
PLAGL1	rs17073273	6	144330243	intron	57 (1)	A>C	1	0.97	0.3	0.310643	0.9722	0.9484
PLAGL1	rs77203559	6	144330665	intron	64 (1)	G>C	1	0.94	0.14	NA	NA	NA
PLAGL1	rs2273323	6	144331154	intron	101 (1)	G>A	1	0.84	0.07	0.0664513	0.9806	0.8779
PLAGL1	rs13218225	6	144332843	intron	73 (1)	C>A	0.999	0.16	0.14	0.135775	0.9902	0.9689
PLAGL1	rs62427103	6	144333836	intron	113 (1)	G>C	0.999	0.14	0.09	NA	NA	NA
PLAGL1	rs78198773	6	144334186	intron	106 (1)	A>G	0.999	1	0.04	NA	NA	NA
PLAGL1	rs1884402	6	144334872	intron	25 (3)	A>G	0.998	0.22	0.25	0.236255	0.9772	0.9509
PLAGL1	rs768874	6	144337227	intron	92 (1)	G>C	0.9909	0.94	0.2	0.197482	0.987	0.9643
PLAGL1	rs9386053	6	144338845	intron	2 (12)	A>G	1	0.32	0.46	0.463446	0.9977	0.9963
PLAGL1	rs73006229	6	144339115	intron	74 (1)	n.a.		Poor clustering		NA	NA	NA
PLAGL1	rs6900939	6	144339921	intron	80 (1)	G>C	0.9769	0	0.15	NA	NA	NA
PLAGL1	rs9376802	6	144340426	intron	55 (1)	n.a.		Poor clustering		NA	NA	NA
PLAGL1	rs4379308	6	144342912	intron	99 (1)	A>C	1	0.58	0.03	0.0539667	0.9614	0.7137
PLAGL1	rs76194939	6	144344833	intron	68 (1)	A>G	0.998	0.66	0.19	NA	NA	NA
PLAGL1	rs9321955	6	144346420	intron	8 (8)	C>A	1	0.26	0.2	0.197014	0.9994	0.9986
PLAGL1	rs9403542	6	144347261	intron	23 (3)	G>A	1	0.33	0.35	0.360858	0.9996	0.9993
PLAGL1	rs78345318	6	144349863	intron	4 (11)	G>A	0.999	0.95	0.14	NA	NA	NA
PLAGL1	rs6914948	6	144350757	intron	56 (1)	A>G	1	0.65	0.26	NA	NA	NA
PLAGL1	rs77923789	6	144352963	intron	75 (1)	n.a.		Poor clustering		NA	NA	NA
PLAGL1	rs79924684	6	144356795	intron	88 (1)	A>G	1	0.45	0.1	NA	NA	NA
PLAGL1	rs6928827	6	144356912	intron	104 (1)	G>A	1	0.44	0.12	NA	NA	NA
PLAGL1	rs74748302	6	144357112	intron	82 (1)	G>A	1	0.36	0.1	NA	NA	NA
PLAGL1	rs1998017	6	144358817	intron	4 (11)	G>A	1	0.94	0.14	0.155828	0.9659	0.9033
PLAGL1	rs9399469	6	144360222	intron	53 (1)	n.a.		Call Rate < 95%		NA	NA	NA
PLAGL1	rs4552753	6	144360691	intron	32 (2)	n.a.		Poor clustering		NA	NA	NA
PLAGL1	rs6570599	6	144361100	intron	58 (1)	n.a.		HWE pval < .0001		NA	NA	NA
PLAGL1	rs76974282	6	144361733	intron	67 (1)	G>A	1	0.88	0.15	NA	NA	NA
PLAGL1	rs73006262	6	144361862	intron	72 (1)	G>A	1	0.8	0.2	NA	NA	NA
PLAGL1	rs56211878	6	144361967	intron	65 (1)	A>C	1	0.93	0.17	NA	NA	NA
PLAGL1	rs80037662	6	144364681	intron	60 (1)	T>A	1	0.1	0.24	NA	NA	NA
PLAGL1	rs2328538	6	144365311	intron	42 (1)	C>A	1	0.87	0.41	NA	NA	NA
PLAGL1	rs12529147	6	144365394	intron	10 (6)	G>A	1	0.64	0.16	NA	NA	NA
PLAGL1	rs2328539	6	144365522	intron	19 (3)	T>A	0.999	0.91	0.41	0.429132	0.9897	0.9837
PLAGL1	rs62427128	6	144367407	intron	26 (3)	G>A	1	0.81	0.16	NA	NA	NA
PLAGL1	rs11155339	6	144369121	intron	59 (1)	A>G	0.998	0.81	0.24	NA	NA	NA
PLAGL1	rs2281476	6	144370661	intron	5 (10)	A>G	0.9909	0.24	0.25	0.25079	0.9986	0.997
PLAGL1	rs28364590	6	144371507	intron	5 (10)	A>G	0.997	0.53	0.24	NA	NA	NA
PLAGL1	rs62427131	6	144374418	intron	89 (1)	A>G	1	0.21	0.09	NA	NA	NA
PLAGL1	rs2207851	6	144379579	intron	28 (2)	G>A	1	0.2	0.43	NA	NA	NA
PLAGL1	rs7752303	6	144380902	intron	47 (1)	T>A	1	0.82	0.33	0.344752	0.8685	0.7795
PLAGL1	rs117536505	6	144383545	intron	36 (2)	n.a.		Poor clustering		NA	NA	NA
PLAGL1	rs7773278	6	144384511	intron	77 (1)	A>G	1	0.52	0.17	0.166112	0.9985	0.9959
PLAGL1	rs9496839	6	144385301	intron	46 (1)	n.a.		Poor clustering		NA	NA	NA
PLAGL1	rs11155340	6	144385854	intron	48 (1)	T>A	1	0.34	0.34	0.372058	0.8683	0.7873
PLAGL1	rs35131977	6	144390574	intron	12 (5)	G>A	1	0.74	0.14	NA	NA	NA
PLAGL1	rs6930429	6	144397367	intron	14 (5)	G>A	1	0.35	0.09	0.0887638	0.9997	0.9986
PLAGL1	rs9321958	6	144399810	intron	15 (4)	A>G	0.998	0.15	0.45	0.481102	0.9967	0.9944
PLAGL1	rs2144571	6	144401619	intron	31 (2)	A>G	0.999	0.33	0.09	0.0885144	0.9991	0.996
PLAGL1	rs4629703	6	144404017	intron	3 (12)	A>G	0.992	0.76	0.15	NA	NA	NA
PLAGL1	rs73008217	6	144412024	intron	97 (1)	G>A	0.999	0.85	0.08	NA	NA	NA
PLAGL1	rs12525521	6	144412958	intron	1 (14)	G>A	1	0.41	0.09	0.0883633	0.9995	0.9977
PLAGL1	rs11757814	6	144415611	intron	1 (14)	A>G	0.998	0.83	0.09	0.0891121	0.9982	0.9911
PLAGL1	rs117059750	6	144417845	intron	27 (3)	C>G	1	0.47	0.07	NA	NA	NA
PLAGL1	rs78430069	6	144418498	intron	105 (1)	G>A	0.999	0.36	0.07	NA	NA	NA
PLAGL1	rs13195390	6	144418805	intron	11 (5)	A>G	1	0.59	0.21	0.196899	0.9997	0.9992
PLAGL1	rs62427138	6	144419172	intron	9 (8)	G>A	1	0.48	0.07	NA	NA	NA
PLAGL1	rs73592669	6	144420182	intron	33 (2)	A>G	1	0.93	0.1	NA	NA	NA
PLAGL1	rs10457757	6	144423621	intron	54 (1)	C>A	1	0.75	0.32	0.289968	0.9911	0.9834
PLAGL1	rs2328542	6	144423987	intron	21 (3)	A>G	0.999	0.57	0.47	0.440591	0.998	0.997
PLAGL1	rs2223498	6	144426097	intron	3 (12)	G>A	1	0.68	0.15	0.147523	0.9991	0.9973
PLAGL1	rs117818420	6	144428843	5' (1,415)	30 (2)	n.a.		Poor clustering		NA	NA	NA
PLAGL1	rs1883447	6	144429391	5' (1,963)	76 (1)	G>A	1	0.36	0.13	0.116678	0.9994	0.9977
PLAGL1	rs28452541	6	144430345	5' (2,917)	63 (1)	n.a.		Poor clustering		NA	NA	NA
PLAGL1	rs4895628	6	144431246	5' (3,818)	70 (1)	A>G	1	0.42	0.24	NA	NA	NA
PLAGL1	rs2064249	6	144431966	5' (4,538)	44 (1)	G>C	0.998	0.86	0.4	0.366511	0.9812	0.9699
PRNP	rs76468561	20	4610313	5' (4,484)	24 (1)	G>A	0.999	1	0.02	NA	NA	NA
PRNP	rs2756271	20	4613262	5' (1,535)	9 (1)	G>A	1	0.4	0.41	0.425518	0.9981	0.9964
PRNP	rs75748440	20	4613886	5' (911)	17 (1)	C>A	0.994	1	0.02	NA	NA	NA
PRNP	rs57633656	20	4614109	5' (688)	23 (1)	n.a.		Poor clustering		NA	NA	NA
PRNP	rs13040327	20	4614924	5' UTR	20 (1)	G>C	0.999	0.8	0.13	NA	NA	NA
PRNP	rs1931969	20	4616328	intron	8 (2)	A>C	1	0.82	0.25	NA	NA	NA
PRNP	rs6116471	20	4617534	intron	5 (3)	G>A	1	0.89	0.28	0.285577	0.9261	0.8601
PRNP	rs6052769	20	4619225	intron	10 (1)	A>C	0.997	0.87	0.35	NA	NA	NA
PRNP	rs6084833	20	4620759	intron	1 (8)	G>A	1	0.75	0.05	0.0547198	0.9982	0.9872
PRNP	rs35643278	20	4621532	intron	18 (1)	G>A	1	0.41	0.14	NA	NA	NA
PRNP	rs6037932	20	4623155	intron	6 (3)	A>T	1	0.73	0.3	0.293347	0.9594	0.9219
PRNP	rs13045348	20	4623589	intron	15 (1)	A>G	1	0.41	0.21	0.202404	0.9618	0.9078
PRNP	rs6107516	20	4625092	intron	3 (4)	G>A	0.997	0.82	0.24	0.227828	0.9984	0.9958
PRNP	rs1799990	20	4628251	M129V	7 (2)	A>G	1	0.99	0.33	0.358714	0.9048	0.8435
PRNP	rs7274758	20	4629310	3' UTR	2 (7)	A>G	1	0.26	0.03	0.0315479	0.9854	0.8059
PRNP	rs12625444	20	4630507	3' (273)	13 (1)	G>A	1	0.9	0.21	0.197245	0.9915	0.9783
PRNP	rs2065706	20	4631295	3' (1,061)	16 (1)	A>G	0.999	0.09	0.19	0.191683	0.9439	0.8592
PRNP	rs6084836	20	4632286	3' (2,052)	12 (1)	n.a.		Poor clustering		NA	NA	NA
PRNP	rs2855412	20	4632718	3' (2,484)	19 (1)	A>G	1	0.35	0.12	0.120351	0.9957	0.9855
PRNP	rs6084839	20	4633707	3' (3,473)	21 (1)	A>C	1	0.75	0.06	0.0615807	0.9904	0.9358
PRNP	rs6084840	20	4634025	3' (3,791)	4 (4)	C>G	0.995	0.53	0.08	NA	NA	NA
RGS1	rs1323292	1	190807644	5' (3836)	2 (6)	A>G	1	0.51	0.18	0.183328	0.998	0.9939
RGS1	rs114157258	1	190811389	5' (91)	13 (1)	n.a.		Poor clustering		NA	NA	NA
RGS1	rs10921202	1	190813675	intron	12 (1)	C>A	1	0.01	0.07	0.0673596	0.9906	0.9456
RGS1	rs1923949	1	190814333	intron	9 (1)	A>G	1	0.88	0.26	0.248012	0.9936	0.9843
RGS1	rs3790365	1	190814470	intron	14 (1)	A>T	1	0.08	0.07	NA	NA	NA
RGS1	rs2816306	1	190814668	intron	10 (1)	A>G	1	0.1	0.13	0.146106	0.9193	0.7569
RGS1	rs2816307	1	190814852	intron	4 (2)	C>A	1	0.27	0.06	0.0084064	0.9855	0.2954
RGS1	rs2816308	1	190815182	3' UTR	1 (15)	G>C	1	0.25	0.09	NA	NA	NA
RGS1	rs2760535	1	190816535	3' (753)	1 (15)	G>A	1	0.24	0.09	0.0869171	0.9987	0.9925
RGS1	rs2984921	1	190818247	3' (2,465)	6 (1)	G>A	0.997	0.64	0.27	0.27279	0.9978	0.9947
RGS1	rs6657799	1	190819223	3' (3,441)	7 (1)	G>A	0.999	0.31	0.22	0.223386	0.9888	0.9735
RGS1	rs6658019	1	190819425	3' (3,643)	5 (1)	C>A	1	0.82	0.33	0.302467	0.8818	0.7764
RGS1	rs61824676	1	190820488	3' (4,706)	11 (1)	G>A	1	0.15	0.12	NA	NA	NA
RGS1	rs11576991	1	190820569	3' (4,787)	3 (4)	C>A	1	0.16	0.12	0.106751	0.9305	0.6992
RGS16	rs10494534	1	180830685	3' (3696)	10 (1)	C>A	1	0.75	0.05	0.031699	0.9536	0.4266
RGS16	rs942436	1	180831897	3' (2484)	1 (7)	G>A	1	0.37	0.38	0.399914	0.9559	0.9184
RGS16	rs79510536	1	180832463	3' (1918)	8 (1)	n.a.		Poor clustering		NA	NA	NA
RGS16	rs4652734	1	180834142	3' (239)	9 (1)	G>A	0.999	0.19	0.05	NA	NA	NA
RGS16	rs597880	1	180839498	intron	2 (4)	A>G	1	0.52	0.4	0.380559	0.8993	0.818
RGS16	rs55934782	1	180844008	5' (3837)	6 (1)	A>G	1	0.32	0.22	NA	NA	NA
RGS16	rs10911103	1	180844113	5' (3942)	4 (1)	C>G	0.999	0.08	0.35	NA	NA	NA
RGS16	rs571556	1	180844284	5' (4113)	5 (1)	A>T	1	0.95	0.23	0.235049	0.8524	0.6689
RGS16	rs606796	1	180844434	5' (4263)	3 (1)	C>G	0.999	0.95	0.36	NA	NA	NA
SH3BGRL2	rs2812722	6	80393855	5' (3,864)	28 (1)	G>A	1	0.7	0.29	NA	NA	NA
SH3BGRL2	rs6934345	6	80393987	5' (3,732)	16 (3)	G>A	1	0.07	0.25	NA	NA	NA
SH3BGRL2	rs10455123	6	80395310	5' (2,409)	39 (1)	n.a.		Poor clustering		NA	NA	NA
SH3BGRL2	rs2655684	6	80395807	5' (1,912)	30 (1)	G>A	0.9869	0.005	0.3	0.332542	0.9993	0.9986
SH3BGRL2	rs1504366	6	80396235	5' (1,484)	12 (3)	G>A	1	0.53	0.43	NA	NA	NA
SH3BGRL2	rs1504367	6	80396960	5' (759)	37 (1)	A>G	1	0.28	0.12	NA	NA	NA
SH3BGRL2	rs3812155	6	80397614	5' (105)	4 (9)	G>A	0.9879	0.86	0.11	NA	NA	NA
SH3BGRL2	rs72905713	6	80399336	intron	20 (3)	G>A	1	0.5	0.09	NA	NA	NA
SH3BGRL2	rs10455361	6	80401667	intron	13 (3)	G>A	1	0.91	0.35	0.364133	0.9975	0.9967
SH3BGRL2	rs1910597	6	80403721	intron	21 (2)	G>A	0.994	0.64	0.47	0.475235	0.9797	0.9684
SH3BGRL2	rs2655685	6	80407253	intron	7 (5)	G>A	0.999	0.61	0.07	NA	NA	NA
SH3BGRL2	rs12199165	6	80411084	intron	10 (4)	A>G	0.999	0.86	0.32	0.333689	0.9951	0.9912
SH3BGRL2	rs9359386	6	80412692	intron	2 (12)	G>A	1	0.43	0.09	0.0815045	0.9956	0.9765
SH3BGRL2	rs12204739	6	80413774	intron	27 (1)	n.a.		Poor clustering		NA	NA	NA
SH3BGRL2	rs62413425	6	80414320	intron	36 (1)	G>A	1	0.26	0.11	NA	NA	NA
SH3BGRL2	rs4140508	6	80415671	intron	9 (4)	A>G	1	0.85	0.37	0.390537	0.9758	0.9577
SH3BGRL2	rs12216227	6	80418250	intron	3 (11)	A>G	0.992	0.13	0.47	0.463654	0.9996	0.9993
SH3BGRL2	rs12210005	6	80422061	intron	3 (11)	G>A	1	0.11	0.47	0.464934	0.9949	0.9917
SH3BGRL2	rs2746313	6	80422864	intron	34 (1)	A>G	1	0.34	0.18	0.179456	0.9995	0.9989
SH3BGRL2	rs9448761	6	80435039	intron	15 (3)	C>G	1	0.53	0.36	NA	NA	NA
SH3BGRL2	rs80265756	6	80435888	intron	40 (1)	n.a.		Poor clustering		NA	NA	NA
SH3BGRL2	rs1883878	6	80439635	intron	5 (7)	A>C	1	0.22	0.19	0.199489	0.9879	0.9669
SH3BGRL2	rs80214847	6	80440469	intron	44 (1)	G>A	1	1	0.03	NA	NA	NA
SH3BGRL2	rs2295013	6	80440865	intron	2 (12)	G>A	1	0.48	0.09	0.083842	0.977	0.8909
SH3BGRL2	rs2812706	6	80442420	intron	32 (1)	A>G	1	0.1	0.24	0.219801	0.9829	0.9591
SH3BGRL2	rs1883879	6	80443651	intron	6 (7)	C>G	1	0.68	0.11	0.113912	0.9843	0.9428
SH3BGRL2	rs2812704	6	80444120	intron	17 (3)	C>A	1	0.83	0.3	0.3129	0.9684	0.9456
SH3BGRL2	rs2874759	6	80449007	intron	23 (1)	A>G	0.9728	0.55	0.39	0.39789	0.9993	0.9987
SH3BGRL2	rs17506032	6	80451085	intron	33 (1)	G>A	0.994	0.17	0.16	0.163257	0.9988	0.9963
SH3BGRL2	rs4140507	6	80454604	intron	8 (4)	G>C	1	0.44	0.48	0.497595	0.9909	0.9843
SH3BGRL2	rs2812701	6	80456296	intron	18 (3)	A>C	1	0.93	0.21	NA	NA	NA
SH3BGRL2	rs2295014	6	80462555	intron	26 (1)	G>A	1	0.47	0.33	0.341077	0.9997	0.9994
SH3BGRL2	rs6927296	6	80463525	intron	41 (1)	G>C	1	0.7	0.06	0.0871554	0.9319	0.691
SH3BGRL2	rs726695	6	80465241	intron	19 (3)	n.a.		Poor clustering		NA	NA	NA
SH3BGRL2	rs41270549	6	80466880	3' UTR	11 (4)	G>A	1	0.54	0.08	NA	NA	NA
SH3BGRL2	rs2295015	6	80467675	3' UTR	45 (1)	A>G	1	0.52	0.07	0.0466928	0.9723	0.7599
SH3BGRL2	rs55699131	6	80467817	3' UTR	1 (23)	T>A	1	0.12	0.15	NA	NA	NA
SH3BGRL2	rs1062793	6	80468115	3' UTR	14 (3)	A>G	0.999	0.43	0.35	0.360749	0.9998	0.9997
SH3BGRL2	rs1503	6	80468230	3' UTR	14 (3)	A>C	1	0.33	0.35	0.360888	0.9972	0.9943
SH3BGRL2	rs72907708	6	80469215	3' UTR	49 (1)	G>A	1	0.64	0.04	NA	NA	NA
SH3BGRL2	rs1044204	6	80469644	3' UTR	1 (23)	A>G	1	0.12	0.15	0.151068	0.9812	0.9345
SH3BGRL2	rs67970395	6	80470805	3' (717)	43 (1)	A>T	0.997	0.34	0.09	NA	NA	NA
SH3BGRL2	rs6899814	6	80470921	3' (833)	25 (1)	A>G	1	0.4	0.42	0.429384	0.9968	0.9944
SH3BGRL2	rs55728170	6	80471480	3' (1,392)	47 (1)	G>A	0.999	0.52	0.08	NA	NA	NA
SH3BGRL2	rs62411093	6	80472621	3' (2,533)	31 (1)	G>A	1	0.13	0.26	NA	NA	NA
SH3BGRL2	rs12210764	6	80474900	3' (4,812)	24 (1)	G>A	1	0.38	0.4	0.419484	0.8779	0.803
SLC22A2	rs2619264	6	160555248	3' (2,532)	17 (1)	n.a.		Poor clustering		NA	NA	NA
SLC22A2	rs77898327	6	160556627	3' (1,153)	31 (1)	G>A	1	0.88	0.14	NA	NA	NA
SLC22A2	rs596881	6	160557229	3' (551)	4 (11)	G>A	1	0.33	0.1	0.106163	0.9964	0.9833
SLC22A2	rs595374	6	160557552	3' (228)	19 (1)	G>A	1	0.25	0.22	NA	NA	NA
SLC22A2	rs2450975	6	160557965	3' UTR	22 (1)	C>A	1	0.25	0.22	0.230483	0.9926	0.9805
SLC22A2	rs3103352	6	160558715	intron	49 (1)	G>A	0.9708	0.002	0.1	0.125166	0.9979	0.9918
SLC22A2	rs117844748	6	160559395	intron	44 (1)	n.a.		Poor clustering		NA	NA	NA
SLC22A2	rs117542150	6	160559459	intron	39 (1)	n.a.		Poor clustering		NA	NA	NA
SLC22A2	rs117364211	6	160559521	intron	52 (1)	n.a.		Poor clustering		NA	NA	NA
SLC22A2	rs114537399	6	160559781	intron	37 (1)	n.a.		Poor clustering		NA	NA	NA
SLC22A2	rs116952208	6	160559911	intron	59 (1)	n.a.		Poor clustering		NA	NA	NA
SLC22A2	rs62639067	6	160559974	intron	26 (1)	n.a.		Poor clustering		NA	NA	NA
SLC22A2	rs117081241	6	160560135	intron	41 (1)	n.a.		Poor clustering		NA	NA	NA
SLC22A2	rs316002	6	160563809	intron	27 (1)	G>A	1	0.3	0.16	0.227699	0.812	0.5891
SLC22A2	rs3127575	6	160564002	intron	3 (12)	G>A	0.994	0.19	0.11	0.121452	0.9967	0.9864
SLC22A2	rs316003	6	160565822	synonymous	1 (30)	A>G	1	0.3	0.22	0.236988	0.9999	0.9998
SLC22A2	rs315984	6	160579713	intron	1 (30)	A>G	1	0.24	0.23	0.237203	0.9985	0.9963
SLC22A2	rs315986	6	160579942	intron	33 (1)	A>G	0.999	0.12	0.1	NA	NA	NA
SLC22A2	rs3101823	6	160581158	intron	34 (1)	n.a.		Call Rate < 95%		NA	NA	NA
SLC22A2	rs115747650	6	160582963	intron	48 (1)	A>T	0.9899	0.23	0.22	NA	NA	NA
SLC22A2	rs17588242	6	160583220	intron	14 (1)	A>G	1	0.69	0.26	0.256636	0.7661	0.5207
SLC22A2	rs315993	6	160584173	intron	15 (1)	A>G	1	0.24	0.23	NA	NA	NA
SLC22A2	rs315995	6	160585451	intron	1 (30)	A>G	1	0.24	0.23	0.236988	0.9996	0.999
SLC22A2	rs617217	6	160586346	intron	23 (1)	C>G	0.999	0.22	0.23	0.237042	0.9967	0.9929
SLC22A2	rs3912161	6	160589708	intron	45 (1)	A>G	1	0.92	0.06	0.0721563	0.9506	0.7052
SLC22A2	rs316019	6	160590272	A270S	5 (4)	C>A	1	0.4	0.1	0.11019	0.9999	0.9995
SLC22A2	rs316015	6	160592254	intron	2 (13)	A>G	1	0.26	0.23	0.240208	0.998	0.9953
SLC22A2	rs316012	6	160593874	intron	2 (13)	G>A	1	0.39	0.23	0.240666	0.9973	0.9935
SLC22A2	rs3798156	6	160596206	intron	7 (3)	G>A	0.995	0.25	0.12	0.131536	0.9956	0.9826
SLC22A2	rs624249	6	160599390	synonymous	9 (1)	C>A	0.996	0.02	0.42	0.414253	0.7609	0.6125
SLC22A2	rs316023	6	160601304	5' (1,355)	10 (1)	A>G	1	0.13	0.37	NA	NA	NA
SLC22A2	rs3127573	6	160601383	5' (1,434)	6 (3)	A>G	1	0.79	0.11	0.126228	0.9956	0.9819
SLC22A2	rs316024	6	160602227	5' (2,278)	12 (1)	G>A	1	0.47	0.32	0.31463	0.9017	0.8091
SLC22A2	rs16891266	6	160602644	5' (2,695)	57 (1)	G>A	1	0.55	0.03	0.0183826	0.9824	0.6427
SLC22A2	rs492453	6	160603259	5' (3,310)	13 (1)	A>G	0.997	0.88	0.31	0.312152	0.9392	0.8701
SLC22A2	rs316025	6	160603371	5' (3,422)	16 (1)	G>A	1	0.34	0.25	0.270005	0.9806	0.9586
SLC22A2	rs316026	6	160604360	5' (4,411)	8 (1)	n.a.		Poor clustering		NA	NA	NA
SMAD3	rs62005979	15	65141882	5' (3,367)	66 (1)	n.a.		Poor clustering		NA	NA	NA
SMAD3	rs34307601	15	65143276	5' (1,973)	14 (5)	C>A	1	0.91	0.23	NA	NA	NA
SMAD3	rs11635753	15	65143477	5' (1,772)	70 (1)	A>G	0.999	0.24	0.24	NA	NA	NA
SMAD3	rs36221701	15	65143543	5' (1,706)	96 (1)	n.a.		Call Rate < 95%		NA	NA	NA
SMAD3	rs3809572	15	65143828	5' (1,421)	40 (2)	n.a.		HWE pval < .0001		NA	NA	NA
SMAD3	rs36222034	15	65144732	5' (517)	16 (5)	G>A	0.9718	0.76	0.16	NA	NA	NA
SMAD3	rs12901148	15	65148320	intron	87 (1)	A>G	1	0.84	0.13	NA	NA	NA
SMAD3	rs12904944	15	65148828	intron	33 (2)	n.a.		HWE pval < .0001		NA	NA	NA
SMAD3	rs4776879	15	65151374	intron	48 (1)	T>A	1	0.81	0.43	NA	NA	NA
SMAD3	rs12908498	15	65153542	intron	4 (15)	G>C	1	0.93	0.46	NA	NA	NA
SMAD3	rs12913535	15	65154333	intron	98 (1)	A>T	0.999	0.6	0.1	NA	NA	NA
SMAD3	rs11638611	15	65154656	intron	103 (1)	C>G	1	0.01	0.05	NA	NA	NA
SMAD3	rs1498507	15	65154760	intron	46 (1)	A>C	1	0.93	0.46	NA	NA	NA
SMAD3	rs11635145	15	65157175	intron	4 (15)	A>G	1	0.89	0.46	0.470239	0.9913	0.9875
SMAD3	rs12901071	15	65157443	intron	31 (2)	A>G	1	0.4	0.33	0.342908	0.9584	0.93
SMAD3	rs6494629	15	65161165	intron	57 (1)	A>G	1	0.96	0.47	0.471936	0.9911	0.9849
SMAD3	rs12910698	15	65162598	intron	1 (31)	C>A	1	0.89	0.44	0.44337	0.9607	0.9347
SMAD3	rs4776881	15	65163054	intron	1 (31)	A>G	0.999	0.87	0.44	0.444055	0.9605	0.9346
SMAD3	rs12324036	15	65164544	intron	1 (31)	G>A	1	0.9	0.45	0.444727	0.9607	0.9354
SMAD3	rs58419901	15	65165077	intron	11 (7)	A>G	0.997	1	0.05	NA	NA	NA
SMAD3	rs4776882	15	65165257	intron	60 (1)	n.a.		Poor clustering		NA	NA	NA
SMAD3	rs12907997	15	65167663	intron	19 (4)	A>G	0.999	0.3	0.5	0.491875	0.9817	0.9694
SMAD3	rs117621261	15	65174942	intron	92 (1)	n.a.		Poor clustering		NA	NA	NA
SMAD3	rs62006014	15	65177768	intron	65 (1)	A>C	0.994	0.12	0.13	NA	NA	NA
SMAD3	rs9972423	15	65178859	intron	29 (2)	T>A	1	0.93	0.35	0.406781	0.8624	0.7601
SMAD3	rs4776890	15	65180099	intron	58 (1)	A>C	1	0.58	0.42	0.392714	0.8988	0.8217
SMAD3	rs17213990	15	65181073	intron	6 (13)	G>A	1	0.07	0.13	0.120281	0.9969	0.9896
SMAD3	rs55712515	15	65181661	intron	102 (1)	n.a.		Poor clustering		NA	NA	NA
SMAD3	rs1530060	15	65183742	intron	22 (3)	A>G	1	0.76	0.29	NA	NA	NA
SMAD3	rs2118611	15	65188520	intron	25 (3)	A>G	1	0.37	0.21	0.197153	0.9919	0.9772
SMAD3	rs11071933	15	65188800	intron	15 (5)	G>C	0.998	0.33	0.35	0.32873	0.955	0.915
SMAD3	rs1438386	15	65194953	intron	62 (1)	A>G	0.9708	0.26	0.4	0.342046	0.8717	0.7792
SMAD3	rs7168228	15	65195295	intron	107 (1)	T>A	1	0.87	0.08	0.0669032	0.983	0.888
SMAD3	rs60428975	15	65195541	intron	84 (1)	A>G	1	0.001	0.15	NA	NA	NA
SMAD3	rs35887379	15	65196964	intron	56 (1)	n.a.		Poor clustering		NA	NA	NA
SMAD3	rs11637581	15	65199103	intron	35 (2)	G>A	0.999	0.45	0.28	0.274079	0.9986	0.9967
SMAD3	rs718663	15	65199650	intron	41 (2)	A>G	1	0.96	0.08	0.067167	0.9885	0.9269
SMAD3	rs7163381	15	65201109	intron	67 (1)	G>A	1	0.54	0.29	0.263822	0.9767	0.9513
SMAD3	rs4776892	15	65201291	intron	77 (1)	A>T	1	0.41	0.2	0.182053	0.9782	0.9414
SMAD3	rs920293	15	65201479	intron	6 (13)	A>G	0.9809	0.19	0.09	0.0807995	0.9993	0.9966
SMAD3	rs4776341	15	65201965	intron	54 (1)	C>A	1	0.53	0.5	NA	NA	NA
SMAD3	rs16950615	15	65203806	intron	42 (2)	C>G	1	0.71	0.04	0.0400683	0.9808	0.8168
SMAD3	rs16950625	15	65204724	intron	26 (3)	G>A	1	0.89	0.07	NA	NA	NA
SMAD3	rs117692380	15	65205383	intron	110 (1)	n.a.		Poor clustering		NA	NA	NA
SMAD3	rs1992215	15	65205991	intron	2 (23)	A>G	1	0.83	0.32	0.334251	0.9996	0.9994
SMAD3	rs991157	15	65206067	intron	59 (1)	G>A	0.998	0.49	0.3	0.299461	0.9669	0.9364
SMAD3	rs12442452	15	65206666	intron	2 (23)	C>G	0.999	0.97	0.31	0.333597	0.9989	0.9982
SMAD3	rs12102184	15	65212197	intron	21 (4)	G>A	0.997	0.02	0.18	NA	NA	NA
SMAD3	rs62006053	15	65214644	intron	81 (1)	A>G	1	0.92	0.16	NA	NA	NA
SMAD3	rs28587205	15	65214951	intron	44 (1)	A>T	0.999	0.6	0.46	NA	NA	NA
SMAD3	rs4147358	15	65215068	intron	20 (4)	C>A	1	0.07	0.23	0.217513	0.9999	0.9998
SMAD3	rs2118610	15	65215388	intron	13 (5)	G>A	0.996	0.67	0.46	0.449259	0.9999	0.9999
SMAD3	rs12916244	15	65216081	intron	99 (1)	n.a.		Poor clustering		NA	NA	NA
SMAD3	rs12914140	15	65217606	intron	104 (1)	A>G	1	0.59	0.07	0.0726082	0.9983	0.9899
SMAD3	rs10518714	15	65219215	intron	32 (2)	A>C	0.998	0.68	0.31	0.317662	0.9853	0.9746
SMAD3	rs2414937	15	65219730	intron	75 (1)	C>G	1	0.59	0.2	0.182991	0.9591	0.8951
SMAD3	rs17293408	15	65221112	intron	100 (1)	G>A	1	0.81	0.08	0.128793	0.8783	0.6132
SMAD3	rs71400358	15	65221328	intron	39 (2)	A>G	0.999	0.9	0.15	NA	NA	NA
SMAD3	rs12915039	15	65221402	intron	37 (2)	A>C	1	0.39	0.23	0.24738	0.9936	0.9862
SMAD3	rs745103	15	65222129	intron	53 (1)	A>G	1	0.27	0.47	0.449242	0.9963	0.9947
SMAD3	rs12439792	15	65224439	intron	105 (1)	A>T	0.9909	0.45	0.1	0.0890569	0.9624	0.8275
SMAD3	rs17293443	15	65224917	intron	36 (2)	A>G	1	0.18	0.22	0.226716	0.9966	0.9923
SMAD3	rs893473	15	65225145	intron	78 (1)	G>A	0.997	0.13	0.2	0.189369	0.994	0.9855
SMAD3	rs750766	15	65225640	intron	28 (2)	G>A	1	0.51	0.46	0.481354	0.9876	0.9797
SMAD3	rs62006055	15	65226683	intron	72 (1)	A>G	0.9909	0.79	0.25	NA	NA	NA
SMAD3	rs7167532	15	65228310	intron	8 (8)	C>A	1	0.92	0.22	NA	NA	NA
SMAD3	rs1866317	15	65228818	intron	9 (7)	G>C	0.996	0.01	0.13	0.119752	0.9768	0.9132
SMAD3	rs11637659	15	65229440	intron	74 (1)	G>A	1	0.05	0.21	0.185351	0.9972	0.9927
SMAD3	rs731874	15	65233885	intron	7 (9)	G>A	1	0.33	0.28	0.285657	0.9999	0.9997
SMAD3	rs11634793	15	65234506	intron	18 (4)	A>G	1	0.25	0.5	0.484931	0.9948	0.9902
SMAD3	rs72743467	15	65238464	intron	79 (1)	n.a.		Poor clustering		NA	NA	NA
SMAD3	rs56062135	15	65242684	intron	5 (14)	G>A	1	0.01	0.23	NA	NA	NA
SMAD3	rs2289261	15	65244539	intron	61 (1)	G>C	0.999	0.97	0.36	NA	NA	NA
SMAD3	rs17228313	15	65247680	intron	10 (7)	A>G	1	0.38	0.07	0.0693233	0.9989	0.9918
SMAD3	rs11639295	15	65247811	intron	64 (1)	G>A	1	0.75	0.3	0.307811	0.9973	0.9946
SMAD3	rs7183244	15	65248365	intron	27 (2)	G>A	1	0.15	0.41	0.402364	0.9794	0.9682
SMAD3	rs116923750	15	65249019	intron	111 (1)	n.a.		Poor clustering		NA	NA	NA
SMAD3	rs72743477	15	65251345	intron	76 (1)	A>G	1	0.01	0.21	NA	NA	NA
SMAD3	rs4776344	15	65252417	intron	97 (1)	G>A	0.998	0.8	0.13	0.123313	0.992	0.9702
SMAD3	rs4776345	15	65252650	intron	108 (1)	C>A	0.9879	0.12	0.06	NA	NA	NA
SMAD3	rs2278545	15	65253933	intron	38 (2)	C>A	1	0.35	0.13	0.107928	0.9994	0.9975
SMAD3	rs12912010	15	65254197	intron	24 (3)	C>A	1	0.55	0.21	NA	NA	NA
SMAD3	rs12708492	15	65254595	intron	45 (1)	G>A	1	0.07	0.49	0.471563	0.9957	0.9924
SMAD3	rs117255140	15	65254705	intron	93 (1)	n.a.		Poor clustering		NA	NA	NA
SMAD3	rs17294280	15	65255339	intron	69 (1)	A>G	1	0.02	0.25	0.253146	0.932	0.8507
SMAD3	rs35251008	15	65255579	intron	73 (1)	A>G	0.998	0.92	0.28	NA	NA	NA
SMAD3	rs117009032	15	65255713	intron	90 (1)	G>A	1	0.34	0.07	NA	NA	NA
SMAD3	rs3784680	15	65256182	intron	55 (1)	A>C	0.997	0.63	0.43	NA	NA	NA
SMAD3	rs1470003	15	65256389	intron	47 (1)	C>G	0.999	0.57	0.49	0.454968	0.8863	0.8245
SMAD3	rs1470002	15	65256622	intron	30 (2)	n.a.		HWE pval < .0001		NA	NA	NA
SMAD3	rs28447655	15	65257124	intron	52 (1)	C>A	0.999	0.38	0.42	NA	NA	NA
SMAD3	rs55994097	15	65257188	intron	51 (1)	A>G	1	0.68	0.46	NA	NA	NA
SMAD3	rs893475	15	65257262	intron	63 (1)	A>G	1	0.18	0.34	NA	NA	NA
SMAD3	rs79545745	15	65261765	intron	106 (1)	G>A	1	0.17	0.04	NA	NA	NA
SMAD3	rs10152566	15	65262137	intron	34 (2)	G>A	0.999	0.29	0.29	NA	NA	NA
SMAD3	rs35779650	15	65262914	intron	17 (5)	A>G	0.995	0.69	0.04	NA	NA	NA
SMAD3	rs3825977	15	65268302	intron	80 (1)	G>A	1	0.61	0.2	0.192877	0.994	0.9851
SMAD3	rs28503201	15	65268568	intron	101 (1)	G>A	1	0.26	0.06	NA	NA	NA
SMAD3	rs11629568	15	65269422	intron	49 (1)	A>C	0.999	0.45	0.45	0.462222	0.8724	0.8065
SMAD3	rs8025774	15	65270330	3' UTR	3 (16)	G>A	1	0.19	0.23	0.23427	0.9719	0.9363
SMAD3	rs8031440	15	65271033	3' UTR	3 (16)	G>A	0.999	0.2	0.23	0.234468	0.972	0.9373
SMAD3	rs8031627	15	65271173	3' UTR	3 (16)	G>A	1	0.2	0.23	0.234658	0.9724	0.9391
SMAD3	rs2278670	15	65271351	3' UTR	3 (16)	G>A	1	0.2	0.23	NA	NA	NA
SMAD3	rs11638476	15	65272155	3' UTR	50 (1)	G>A	0.999	0.38	0.45	NA	NA	NA
SMAD3	rs3743342	15	65272721	3' UTR	3 (16)	G>A	1	0.2	0.23	0.235029	0.9741	0.9453
SMAD3	rs11556089	15	65273132	3' UTR	112 (1)	G>A	1	0.16	0.09	NA	NA	NA
SMAD3	rs11556090	15	65273437	3' UTR	12 (5)	G>A	0.999	0.45	0.47	NA	NA	NA
SMAD3	rs1052488	15	65273901	3' UTR	23 (3)	A>G	0.999	0.57	0.25	0.229138	0.9116	0.8015
SMAD3	rs28412970	15	65277407	3' (2,820)	82 (1)	G>C	1	0.69	0.18	NA	NA	NA
SOCS2	rs10859531	12	92482788	5' (4,941)	8 (1)	A>G	1	0.14	0.1	0.0704042	0.9525	0.7386
SOCS2	rs2053196	12	92487090	5' (639)	1 (11)	A>G	1	0.57	0.21	NA	NA	NA
SOCS2	rs2200160	12	92488004	5' UTR	1 (11)	G>A	1	0.57	0.21	NA	NA	NA
SOCS2	rs1498708	12	92488095	5' UTR	6 (1)	G>A	1	0.98	0.13	0.118984	0.9854	0.9461
SOCS2	rs1316739	12	92492387	intron	2 (2)	G>A	0.998	0.92	0.24	NA	NA	NA
SOCS2	rs3816997	12	92494917	3' (808)	5 (1)	A>C	0.997	0.61	0.14	0.125137	0.9993	0.9973
SOCS2	rs11107115	12	92497118	3' (3,009)	7 (1)	A>G	1	0.6	0.21	0.219654	0.9845	0.9622
SOCS2	rs10745657	12	92497632	3' (3,523)	3 (1)	G>A	0.998	0.54	0.46	0.446222	0.9971	0.9943
TNFRSF18-TNFRSF4	rs11260558	1	1124496	3' (4,255) TNFRSF18	2 (2)	n.a.		Poor clustering		NA	NA	NA
TNFRSF18-TNFRSF4	rs9729550	1	1125105	3' (3,646) TNFRSF18	4 (1)	A>C	0.999	0.45	0.26	0.275218	0.9971	0.9932
TNFRSF18-TNFRSF4	rs74508499	1	1128148	3' (603) TNFRSF18	5 (1)	G>C	0.998	0.37	0.1	NA	NA	NA
TNFRSF18-TNFRSF4	rs1815606	1	1130298	intron TNFRSF18	3 (1)	C>A	1	0.73	0.33	0.311161	0.9395	0.8858
TNFRSF18-TNFRSF4	rs3753348	1	1133520	5' (1,568) TNFRSF18, 3' (3,049) TNFRSF4	6 (1), 7 (1)	C>G	0.996	0.81	0.05	0.043272	0.9897	0.9017
TNFRSF18-TNFRSF4	rs78021605	1	1134516	5' (2,564) TNFRSF18, 3' (2,053) TNFRSF4	1 (4), 1 (9)	G>A	0.999	0.41	0.09	NA	NA	NA
TNFRSF18-TNFRSF4	rs34115518	1	1140311	5' (936) TNFRSF4	5 (1)	A>G	0.9909	0.14	0.09	NA	NA	NA
TNFRSF18-TNFRSF4	rs3813201	1	1141095	5' (1,720) TNFRSF4	2 (3)	A>G	0.999	0.66	0.15	NA	NA	NA
TNFRSF18-TNFRSF4	rs78113662	1	1141405	5' (2,030) TNFRSF4	6 (1)	G>A	0.995	0.52	0.06	NA	NA	NA
TNFRSF18-TNFRSF4	rs11721	1	1142494	5' (3,119) TNFRSF4	4 (1)	C>A	0.999	0.56	0.08	0.0891793	0.9989	0.9944
TNFRSF9	rs72633088	1	7900227	3' (2,267)	9 (1)	A>C	0.999	0.58	0.05	NA	NA	NA
TNFRSF9	rs76198826	1	7906039	intron	8 (1)	G>A	0.998	0.84	0.07	NA	NA	NA
TNFRSF9	rs2453021	1	7912153	intron	5 (1)	G>A	1	0.19	0.34	0.368982	0.9107	0.8535
TNFRSF9	rs863171	1	7915202	intron	1 (4)	G>A	1	0.72	0.47	0.481573	0.9541	0.9357
TNFRSF9	rs226478	1	7919221	intron	2 (2)	G>A	1	0.15	0.35	0.337795	0.9601	0.9346
TNFRSF9	rs7545687	1	7919770	intron	4 (2)	G>A	1	0.02	0.16	NA	NA	NA
TNFRSF9	rs226476	1	7921550	intron	7 (1)	C>A	1	0.11	0.04	0.0413875	0.9976	0.9761
TNFRSF9	rs9434948	1	7927550	5' (4,076)	3 (2)	A>C	1	0.81	0.44	NA	NA	NA
eQTL SNPs							Candidate Gene Study			Genomewide Association Study
gene name	rsid	chr	position	Location (bp) nearest gene	eQTL p-value	Alleles	Call Rate	HWE p	MAF	MAF	Impuation Quality	Imputation r2
ACVR2B	rs11131150	3	8870453	3' (26,107) RAD18	2e-07	A>G	0.999	0.97	0.37	0.335309	0.9787	0.9647
CCL17	rs1552913	5	6820071	3' (9,910) POLS	7e-07	A>G	0.998	0.09	0.41	0.400818	0.9661	0.9496
CCL17	rs9313169	5	6830007	3' (19,846) POLS	1e-06	A>G	0.999	0.09	0.41	0.419337	0.9818	0.9688
CCL22	rs7866753	9	8887215	intron PTPRD	7e-07	G>A	0.994	0.8	0.25	0.215974	0.9386	0.8548
CCL5	rs4838936	1	112381405	3' (46,234) LOC643355	8e-07	G>A	0.999	0.04	0.35	0.370211	0.9735	0.9543
CCL5	rs12565909	1	211986936	5' (241,547) PROX1	1e-07	G>A	1	0.29	0.34	0.320969	0.9792	0.9634
CCR7	rs3767848	1	212240463	intron PROX1	2e-07	G>A	1	0.69	0.25	0.221351	0.9202	0.8138
CCR7	rs4143957	14	100590163	5' (233) MIRN382	9e-07	A>G	0.993	0.17	0.22	0.203518	0.9671	0.9214
CCR7	rs7248861	19	45527538	intron C19orf47	8e-07	A>G	1	0.07	0.16	0.159883	0.9999	0.9996
CD80	rs4390968	3	31526784	5' (22,711) STT3B	8e-07	G>A	1	0.53	0.23	0.216418	0.9704	0.9223
CD80	rs11058	3	31678468	3' UTR OSBPL10	1e-06	A>G	1	0.87	0.21	0.180821	0.995	0.9882
CD80	rs7804190	7	1960425	intron MAD1L1	6e-07	C>A	0.999	0.08	0.37	0.349797	0.9007	0.8251
CD80	rs11172506	12	56921388	5' (99094) LOC338805	1e-06	A>G	1	0.58	0.2	0.208725	1	0.9999
CD80	rs12303970	12	56925404	5' (103,110) LOC338805	1e-06	G>A	1	0.64	0.2	0.209433	0.9949	0.9878
CD80 & CXCL10	rs1947507	3	31667295	3' (10,026) OSBPL10	3e-07 & 9e-07	G>A	1	0.72	0.28	0.268861	0.9951	0.9907
CD86	rs12041676	1	8195979	3' (15,357) LOC100129776	6e-07	n.a.		Poor clustering		NA	NA	NA
CD86	rs6961237	7	24481254	5' (98,356) MPP6	4e-07	G>A	1	0.48	0.07	0.0960814	0.9442	0.7498
CXCL10	rs12139388	1	156601170	3' (7,203) CD1E	2e-07	G>A	1	0.67	0.08	0.0685947	0.9938	0.9579
CXCL10	rs7603819	2	51399726	intron LOC730100	1e-07	T>A	1	0.95	0.12	0.105042	0.9957	0.9793
CXCL10	rs2160408	2	51400550	intron LOC730100	1e-07	C>A	0.998	0.97	0.11	0.103656	0.9996	0.9983
CXCL10	rs7607482	2	107922157	5' (18,021) LOC100128964	1e-07	G>A	0.998	0.48	0.07	0.088035	0.9478	0.7449
CXCL10	rs1843297	3	4048723	3' (184,336) LRRN1	4e-07	C>G	1	0.6	0.08	0.0866054	0.9986	0.9927
CXCL10	rs6788870	3	6074412	3' (610,623) MRPS35P1	1e-06	A>G	0.997	0.26	0.17	0.167213	0.9952	0.9845
CXCL10	rs16881215	4	28562415	5' (127,512) LOC645641	1e-07	G>A	1	0.04	0.05	0.0626587	0.9742	0.8457
CXCL10	rs1862162	5	67620514	intron PIK3R1	2e-07	A>G	1	0.17	0.26	0.259257	0.9831	0.9676
CXCL10	rs10058980	5	174420276	3' (136,722) LOC645398	7e-07	G>A	1	0.92	0.12	0.116053	0.8352	0.3457
CXCL10	rs806426	6	88815013	intron SPACA1	1e-06	A>G	1	0.9	0.11	0.11837	0.992	0.9636
CXCL10	rs4917010	7	50163648	intron LOC100130988	1e-07	C>A	1	0.44	0.18	0.178005	0.9998	0.9993
CXCL10	rs6467665	7	135818458	5' (230,688) LOC392100	4e-09	G>A	1	1	0.03	0.0623538	0.9456	0.6097
CXCL10	rs487910	9	100172302	intron GABBR2	4e-07	G>A	1	0.16	0.2	0.203829	0.999	0.9971
CXCL10	rs10818144	9	120186432	5' (300,925) LOC389787	6e-07	G>A	1	0.39	0.08	0.079717	0.9955	0.973
CXCL10	rs1418510	9	120202384	5' (316,877) LOC389787	6e-07	C>A	1	0.37	0.09	0.0785854	0.9993	0.9952
CXCL10	rs17432804	9	130739571	intron PHYHD1	7e-07	G>A	1	0.54	0.15	0.154475	0.871	0.6009
CXCL10	rs10870210	10	134597903	intron C10orf93	7e-07	G>A	0.999	0.005	0.08	0.0826473	0.9978	0.9872
CXCL10	rs4379844	11	21386574	intron NELL1	1e-07	G>A	1	0.5	0.11	0.109043	0.9938	0.9766
CXCL10	rs1235044	11	121303699	3' (171,976) MIRN125B1	3e-07	A>G	1	0.07	0.23	NA	NA	NA
CXCL10	rs7926154	11	121320305	3' (155,370) MIRN125B1	2e-07	G>A	1	0.26	0.19	0.224413	0.9731	0.934
CXCL10	rs1448130	11	121320633	3' (155,042) MIRN125B1	3e-07	G>A	1	0.31	0.23	0.220515	0.9997	0.9993
CXCL10	rs1789750	11	121321074	3' (154,601) MIRN125B1	6e-07	A>C	1	0.39	0.25	0.245096	0.9947	0.9865
CXCL10	rs11218476	11	121328999	3' (146,676) MIRN125B1	1e-07	C>A	1	0.2	0.19	0.192536	0.9981	0.9953
CXCL10	rs17112212	14	26635173	3' (162,460) RPS27AP4	0	A>G	1	0.02	0.13	0.142571	0.9942	0.9788
CXCL10	rs10139474	14	58640929	3' (31,026) AKR1B1P5	1e-07	G>A	1	0.12	0.09	NA	NA	NA
CXCL10	rs9924434	16	82701613	intron MBTPS1	1e-06	A>G	1	0.16	0.1	0.093743	0.9985	0.9928
CXCL10	rs6049350	20	23964073	3' (44,580) LOC651452	1e-07	A>G	1	0.13	0.07	0.0602482	0.9968	0.9764
IKZF4	rs1886406	10	91627568	3' (40,127) hCG_2024094	6e-07	G>A	0.999	0.15	0.49	0.490108	0.9753	0.9602
IL10RB	rs1344618	8	70145455	intron LOC100129096	1e-06	A>G	0.999	0.1	0.13	0.14545	0.9998	0.9994
IL15RA	rs914181	21	41504622	intron BACE2	3e-07	A>G	1	0.13	0.3	0.303217	0.9868	0.9752
INHBB	rs4149333	9	106592745	intron ABCA1	8e-07	n.a.		Poor clustering		NA	NA	NA
INHBB	rs7127399	11	123966484	5' (10,124) OR8Q1P	3e-07	G>A	0.998	0.39	0.32	0.303057	0.9861	0.973
INHBB	rs11614293	12	12026583	3' (86,980) ETV6	0	A>G	1	0.37	0.13	0.114724	0.9739	0.8981
INHBB	rs728190	12	12052922	5' (62,223) BCL2L14	1e-07	C>A	1	0.42	0.15	0.136999	0.9878	0.9608
INHBB	rs7521	17	41461242	3' UTR MAPT	1e-06	G>A	1	0.56	0.43	0.433235	0.9517	0.9119
IRF4	rs1015226	14	98334469	3' (80,619) C14orf177	6e-07	A>G	1	0.74	0.23	0.237767	0.9999	0.9997
LAG3	rs7609589	3	6106198	3' (642,409) MRPS35P1	4e-07	A>G	0.999	0.56	0.35	0.351148	0.9906	0.983
LRRC32	rs10044891	5	155714444	intron SGCD	4e-07	G>A	0.998	0.1	0.08	0.0867098	0.9982	0.9891
LRRC32	rs1865441	8	69735367	intron C8orf34	1e-06	C>A	1	0.51	0.19	0.205308	0.9967	0.9904
LRRC32	rs10505309	8	118306187	3' (48,053) SLC30A8	4e-07	A>G	0.999	0.67	0.06	0.0670584	0.9952	0.9693
LRRC32	rs10812348	9	26087847	5' (418,991) TUSC1	7e-07	A>G	1	1	0.08	0.084822	0.989	0.9367
LRRC32	rs10757596	9	26126235	5' (457,379) TUSC1	7e-07	A>C	0.999	0.41	0.09	0.0876829	0.9885	0.9494
LRRC32	rs937722	15	67468887	intron PAQR5	3e-07	G>A	1	0.49	0.05	0.0454972	0.9865	0.8761
MDFIC	rs1325609	1	65578550	intron DNAJC6	6e-07	C>G	1	0.14	0.37	0.388591	0.9908	0.9846
MDFIC	rs12086738	1	65580000	intron DNAJC6	4e-07	G>A	1	0.4	0.42	0.429842	0.9999	0.9998
MDFIC	rs2148682	1	65642077	intron DNAJC6	8e-07	A>G	1	0.45	0.37	0.335874	0.9987	0.9974
PLAGL1	rs10003811	4	189943798	3' (44,677) LOC285442	1e-06	A>G	0.993	0.13	0.18	0.200364	0.9997	0.9992
PLAGL1	rs1448744	4	189967775	3' (68,654) LOC285442	9e-07	A>G	0.999	0.38	0.22	NA	NA	NA
PRNP	rs1402292	3	55406449	3' (68,334) WNT5A	6e-07	C>A	1	0.4	0.48	0.480709	0.9969	0.9945
PRNP	rs7255802	19	3802622	intron ZFR2	6e-07	A>G	0.998	0.63	0.39	0.402144	0.9996	0.9994
RGS16	rs11767564	7	131339092	5' (82,473) LOC100132328	1e-07	G>A	0.999	0.02	0.17	0.204953	0.9251	0.8244
RGS16	rs7790679	7	131363421	5' (58,144) LOC100132328	0	G>A	1	0.24	0.24	0.249916	0.9598	0.9149
RGS16	rs6467419	7	131381384	5' (40,181) LOC100132328	2e-07	A>G	0.999	0.54	0.2	0.201543	0.9828	0.9546
SMAD3	rs10515799	5	158919215	5' (229,156) IL12B	2e-07	A>G	1	0.42	0.22	0.198082	0.9509	0.8748
SMAD3	rs11049123	12	27806197	3' (5,702) MRPS35	2e-07	G>A	1	0.64	0.15	0.149685	0.9536	0.8536
SMAD3	rs12814230	12	27809711	3' (9,216) MRPS35	0	C>G	1	0.66	0.15	0.164937	0.9935	0.981
SMAD3	rs9318051	13	71512497	5' (173,166) DACH1	1e-06	G>A	1	0.81	0.07	0.0838991	0.99	0.9454
SMAD3	rs7988569	13	71555819	5' (216,488) DACH1	1e-06	G>A	0.999	0.48	0.07	0.0815537	0.9991	0.9945
SMAD3	rs9572899	13	71644143	5' (304,812) DACH1	8e-07	G>A	1	0.15	0.16	0.163926	0.9994	0.9983
SMAD3	rs4083578	13	71666710	5' (327,379) DACH1	1e-06	C>A	1	0.93	0.2	0.199717	0.9989	0.9969
SMAD3	rs10470090	21	33670227	3' (16,228) IFNAR1	2e-07	C>A	0.999	0.72	0.13	0.106614	0.9722	0.8844
TNFRSF18	rs10202118	2	51803828	3' (52,046) CRYGGP1	1e-06	A>G	1	0.43	0.24	0.247466	0.9998	0.9996
TNFRSF18	rs12869164	13	100672178	intron NALCN	7e-07	G>A	0.995	0.16	0.17	0.178299	0.9962	0.9877
TNFRSF18	rs4761	14	23711366	5' UTR REC8	3e-07	A>G	0.996	0.88	0.35	0.347208	0.9982	0.9965
TNFRSF18	rs11856835	15	72503227	intron SEMA7A	1e-07	G>A	0.999	0.28	0.49	0.497679	0.9969	0.9949
TNFRSF4	rs11241590	5	120661654	3' (253,971) LOC728682	6e-07	A>G	1	0.43	0.16	0.153306	0.9498	0.8485
TNFRSF4	rs12520614	5	120701256	3' (238,186) LOC391825	1e-06	G>A	1	0.07	0.22	0.226251	0.9429	0.8809
TNFRSF4	rs987651	5	146633136	intron STK32A	3e-07	A>G	1	0.69	0.16	0.167666	0.9943	0.9832
Genome build 36.3; chr, chromosome; location (bp) relative to RefSeq provided in Table S1; amino acid changes are provided for non-synonymous SNPs; NA, not available.
